# Supplementary material for: Identification of Candidate Genes for Lint Percentage and Fiber Quality Through QTL Mapping and Transcriptome Analysis in an Allotetraploid Interspecific Cotton CSSLs Population
Source: Front Plant Sci. 2022 Apr 29;13:882051. doi: 10.3389/fpls.2022.882051 (PMC9100888; doi:10.3389/fpls.2022.882051)
Supplement: Supplementary Table S2 — Analysis of variation for lint percentage and fiber quality traits in the CSSLs. [file Table_2.XLSX]

## Sheet: Sheet1
Table S6 Detailed information on the QTL for lint percentage and fiber quality traits in the CSSLs.
Traita	QTL	Chromosome	Environmentb	Nearest marker	Position (cM)	LODc	Additive effect	PVE(%)d	Marker interval	Physical distance interval (bp)
LP	qLP-Chr02-1	Chr02	2019CQ	SWU14030	40.08	3.98	1.66	3.4	CCRI12945-NAU5134	3105422-42215130
	qLP-Chr03-1	Chr03	2019CQ	SWU12765a	39.58	3.56	-2.48	3.1	NAU3839a-CCRI03267	3920553-9430617
	qLP-Chr06-1	Chr06	2019CQ	CCRI10496	76.2	2.29	-1.07	2	CCRI09485-CCRI10976a	33891592-115408896
	qLP-Chr06-2	Chr06	2018CQ	BNL2884	92.76	2.16	-2.28	2	CCRI10569-DPL0257a	118434365-121378989
	qLP-Chr06-3	Chr06	2019CQ	NAU3612	98.29	2.18	-1.51	1.9	DPL0257a-CCRI10846a	121378989-124474050
	qLP-Chr08-1	Chr08	2019CQ	CCRI12469	51	2.44	1.94	2.1	SWU13107a-CCRI06550	5646877-91912709
	qLP-Chr08-2	Chr08	2019CQ	GH390	78.54	2.22	1.7	1.9	CCRI06550-CCRI06336	91912709-114328960
	qLP-Chr09-1	Chr09	2018CQ	NAU3538	9.8	2.3	2.22	2.1	NAU5468-CCRI09096	564075-4329973
	qLP-Chr10-1	Chr10	2018CQ	CCRI07644	9.8	4.07	4.02	3.7	GH379-NAU1120	730085-3946810
	qLP-Chr12-1	Chr12	2019CQ	DPL0695c	126.41	3.15	-1.89	2.7	HAU1454-NAU3778	101133695-105247710
	qLP-Chr14-1	Chr14	2018CQ	SWU14260	65.21	2.24	-2.6	2.1	CCRI12874-SWU14457	9015027-51535517
	qLP-Chr14-2	Chr14	2019XJ	CCRI12809	106.06	2.99	-1.08	2.6	CCRI12157-SWU14675	64623643-67066803
			2018CQ	SWU14675	112.68	2.14	-1.98	2	CCRI12809-CCRI12114	65946140-67444656
	qLP-Chr17-1	Chr17	2019XJ	CCRI02966b	56.61	2.45	-1.08	2.1	SWU12062-NAU2649	4609392-28380381
	qLP-Chr17-2	Chr17	2019CQ	SWU12648b	59.86	9.36	-1.92	7.9	NAU2649-NAU2150	28380381-45393465
			2019XJ	SWU12648b	59.86	5.87	-1.59	5	NAU2649-SWU12765b	28380381-48355755
			2020CQ	SWU12648b	59.86	11.23	-2.38	9.2	NAU2649-SWU12765b	28380381-48355755
	qLP-Chr17-3	Chr17	2020CQ	NAU3797	114.47	2.14	1.65	1.8	NAU5260-SWU12966	51040747-53779566
	qLP-Chr19-1	Chr19	2019CQ	SWU18068	71.35	2.16	-1.63	1.9	SWU17940-CCRI12943	10553151-17652436
			2019XJ	SWU18068	71.35	2.32	-1.66	2	SWU17940-CCRI12943	10553151-17652436
	qLP-Chr22-1	Chr22	2020CQ	NAU2553	2.17	2.78	1.9	2.4	NAU2553-SWU20808	611722-2149127
	qLP-Chr24-1	Chr24	2018CQ	SWU13053	34.41	2.1	-2.36	1.9	SWU13027-SWU13107b	2337356-5222533
	qLP-Chr24-2	Chr24	2019XJ	SWU13134	46.46	2.91	-1.3	2.5	SWU13107b-CCRI06367	5222533-11851786
			2020CQ	SWU13200	51.84	4.75	-1.6	4	SWU13134-CCRI06367	6654747-11851786
	qLP-Chr24-3	Chr24	2018CQ	HAU1567	137.63	2.89	4.94	2.7	NAU3287-CGR5804	66506155-68959323
FL	qFL-Chr01-1	Chr01	2018CQ	CCRI02606	60.34	2.04	0.52	1.7	CCRI03337-CCRI03447	12473707-39156816
	qFL-Chr01-2	Chr01	2019CQ	SWU11692a	106.62	2.16	0.62	2	CCRI00744-SWU11726	110598150-115128064
	qFL-Chr02-1	Chr02	2019CQ	SWU14030	40.08	2.12	-0.55	1.9	CCRI12945-CCRI12829a	3105422-7656327
	qFL-Chr05-1	Chr05	2018CQ	HAU1034	81.44	3.26	0.72	2.7	NAU5295-SWU18103	13051682-17383572
	qFL-Chr05-2	Chr05	2019XJ	NAU0961a	214.34	2.93	0.6	2.6	CIR253-NAU3036	105494259-109255630
	qFL-Chr06-1	Chr06	2018CQ	CCRI10496	76.2	2.65	0.58	2.2	CCRI09485-CCRI10569	33891592-118434365
			2019XJ	CCRI09485	74.05	2.18	0.31	1.9	CCRI10576-CCRI10496	28892690-98239502
	qFL-Chr08-1	Chr08	2018CQ	CCRI12469	51	3.51	-1.11	2.9	SWU13107a-BNL3792	5646877-79354581
			2019XJ	CCRI12469	51	2.17	-0.79	1.9	SWU13107a-BNL3792	5646877-79354581
	qFL-Chr08-2	Chr08	2018CQ	GH390	78.54	4.69	-1.19	3.8	CCRI06550-CCRI06336	91912709-114328960
			2019XJ	GH390	78.54	2.42	-0.77	2.1	CCRI06550-CCRI06336	91912709-114328960
			2019CQ	CCRI06336	91.54	2.17	-0.89	2	GH390-SWU19543	100781847-111785241
	qFL-Chr10-1	Chr10	2019CQ	CCRI05850	124.5	2.72	0.68	2.5	CCRI07795-HAU2824	110776274-114401310
	qFL-Chr11-1	Chr11	2019CQ	CCRI02378	92.4	2.55	0.62	2.3	NAU3234-SWU16031	15101751-22283046
	qFL-Chr12-1	Chr12	2019XJ	HAU3002	104.5	2.46	0.57	2.2	BNL2709-NAU2671	93334983-103465008
			2018CQ	HAU1454	111.09	4.61	0.92	3.8	HAU3002-NAU2671	100289358-103465008
			2019CQ	HAU1454	111.09	3.41	0.73	3.1	HAU3002-NAU2671	100289358-103465008
	qFL-Chr14-1	Chr14	2018CQ	SWU13967	24.14	2.8	0.58	2.3	SWU13946-SWU13988	2685200-4778807
			2019CQ	SWU13967	24.14	3.7	0.61	3.3	SWU13946-SWU13978	2685200-4363465
			2019XJ	SWU13967	24.14	3.1	0.54	2.7	SWU13946-SWU13978	2685200-4363465
			2020CQ	NAU0823	23.07	2.3	0.48	2	SWU13946-SWU13967	2685200-4092693
	qFL-Chr14-2	Chr14	2019XJ	CCRI12741	47.74	2.65	0.45	2.3	SWU13988-NAU3648	4778807-7009372
			2018CQ	NAU3648	53.22	2.68	0.62	2.2	CCRI12741-CCRI12829b	6492490-7594977
	qFL-Chr14-3	Chr14	2018CQ	CCRI12874	59.76	2.77	0.57	2.3	CCRI12829b-SWU14483	7594977-54299973
			2019XJ	SWU14260	65.21	2.36	0.54	2.1	CCRI12874-SWU14457	9015027-51535517
	qFL-Chr14-4	Chr14	2019CQ	CCRI12114	121.61	2.23	0.44	2	SWU14675-CIR228	67066803-68244966
			2020CQ	CCRI12114	121.61	3.66	0.56	3.1	SWU14675-CIR228	67066803-68244966
	qFL-Chr17-1	Chr17	2018CQ	SWU12966	120.94	2.24	-0.83	1.8	NAU3797-SWU12966	52679437-53779566
			2019XJ	SWU12966	120.94	2.09	-0.77	1.8	NAU5260-SWU12966	51040747-53779566
	qFL-Chr18-1	Chr18	2018CQ	SWU21710	0	2.03	-0.53	1.7	SWU21710-GH571	135110-1853139
			2019XJ	SWU21710	0	2.44	-0.51	2.1	SWU21710-GH571	135110-1853139
	qFL-Chr21-1	Chr21	2018CQ	CGR5097	23.01	3.24	0.74	2.7	NAU4865-CIR156	1409800-3677982
			2019CQ	CGR5097	23.01	2.27	0.58	2.1	NAU4865-CIR156	1409800-3677982
	qFL-Chr21-2	Chr21	2018CQ	SWU15839	74.7	2.92	-0.75	2.4	CCRI02756-HAU2442	7449517-11782189
	qFL-Chr21-3	Chr21	2018CQ	SWU16072	117.94	2.63	-0.61	2.2	SWU16036-CCRI07985	18858181-28817088
	qFL-Chr22-1	Chr22	2018CQ	NAU2553	2.17	2.1	-0.73	1.7	NAU2553-SWU20808	611722-2149127
	qFL-Chr25-1	Chr25	2018CQ	SWU19812	128.8	2.58	-0.64	2.1	SWU19804b-SWU19844	64007912-64899957
	qFL-Chr26-1	Chr26	2020CQ	NAU4912	78.74	2.04	0.69	1.7	HAU1292-NAU2750	43280013-49128213
FU	qFU-Chr01-1	Chr01	2019CQ	SWU11783	126.46	3.17	-0.7	2.9	CCRI11684-SWU11783	116177926-117023086
	qFU-Chr03-1	Chr03	2019CQ	CCRI03525	2.17	2.24	-0.46	2	SWU12954-CCRI03869	550365-1821515
	qFU-Chr12-1	Chr12	2020CQ	CGR5111	40.06	2.15	0.36	1.6	NAU5218-NAU4942	4543472-10494537
	qFU-Chr15-1	Chr15	2018CQ	SWU10912b	0	2.96	-0.5	2.4	SWU10903b-CCRI03295	239251-1570620
	qFU-Chr17-1	Chr17	2018CQ	SWU11972b	28.51	2.88	-0.6	2.4	SWU11931b-CCRI08269	1532345-3101874
	qFU-Chr18-1	Chr18	2019CQ	HAU1036	58.3	2.39	-0.52	2.2	SWU22137-CGR5021b	10216262-57748392
	qFU-Chr20-1	Chr20	2019CQ	SWU20693	130.17	2.03	0.47	1.8	SWU20661-SWU20738	63100637-66785966
	qFU-Chr24-1	Chr24	2019CQ	CCRI06367	61.53	2.68	0.51	2.4	SWU13200-NAU5399	9643920-56846810
FS	qFS-Chr05-1	Chr05	2018CQ	HAU1034	81.44	2.42	1.2	2	NAU5295-SWU18103	13051682-17383572
	qFS-Chr06-1	Chr06	2020CQ	NAU5270a	42.89	2.14	1.05	1.8	CCRI09357-CCRI00327	3331337-9622906
	qFS-Chr07-1	Chr07	2020CQ	SWU10228	56.05	2.42	-1.17	2.1	NAU1043a-CCRI00581	5229561-17608555
	qFS-Chr08-1	Chr08	2018CQ	GH390	78.54	3.78	-2.06	3.1	SWU13107a-CCRI06336	5646877-114328960
	qFS-Chr12-1	Chr12	2018CQ	HAU1454	111.09	3.75	1.61	3.1	HAU3002-NAU2671	100289358-103465008
	qFS-Chr13-1	Chr13	2019CQ	CCRI04438	21.25	2.18	0.79	2	CCRI04514-CCRI04219	2419232-4884735
	qFS-Chr14-1	Chr14	2020CQ	NAU1159b	15.52	2.49	0.95	2.1	CCRI12417-SWU13946	1549220-2685200
	qFS-Chr14-2	Chr14	2018CQ	CCRI12760	71.71	2.02	0.68	1.7	SWU14483-SWU14535	54299973-58522604
	qFS-Chr14-3	Chr14	2019XJ	CCRI12114	121.61	2.18	0.76	1.9	SWU14675-CIR228	67066803-68244966
			2020CQ	CCRI12114	121.61	2.49	0.84	2.1	SWU14675-CIR228	67066803-68244966
	qFS-Chr17-1	Chr17	2020CQ	NAU3797	114.47	2.51	-1.26	2.1	NAU5260-SWU12966	51040747-53779566
	qFS-Chr21-1	Chr21	2018CQ	SWU15839	74.7	2.33	-1.3	1.9	CCRI02756-HAU2442	7449517-11782189
	qFS-Chr22-1	Chr22	2019XJ	SWU20628c	120.59	2.08	0.67	1.8	SWU21622-NAU3791b	54787123-55941848
	qFS-Chr23-1	Chr23	2018CQ	SWU15551	111.97	2.31	1	1.9	HAU1414-NAU3414b	46632197-49132067
	qFS-Chr24-1	Chr24	2019CQ	SWU13200	51.84	2.06	0.75	1.9	SWU13134-CCRI06367	6654747-11851786
			2020CQ	SWU13200	51.84	2.19	0.83	1.9	SWU13134-CCRI06367	6654747-11851786
	qFS-Chr25-1	Chr25	2019XJ	NAU6573	53.94	2.96	1.1	2.6	SWU19041-SWU19522	2969257-43008423
			2020CQ	SWU19242	64.81	2.39	1.33	2	NAU6573-SWU19522	8018912-43008423
	qFS-Chr25-2	Chr25	2019CQ	NAU0927	90.92	2.1	1.12	1.9	CCRI10976b-BNL2691b	55691495-59375348
	qFS-Chr25-3	Chr25	2018CQ	SWU19812	128.8	4.36	-1.6	3.6	SWU19804b-SWU19844	64007912-64899957
	qFS-Chr26-1	Chr26	2018CQ	GH386	101.81	2.05	-1.16	1.7	NAU2750-DPL0890	49128213-54660167
FM	qFM-Chr02-1	Chr02	2019XJ	SWU14030	40.08	2.03	0.21	1.8	CCRI12945-CCRI12829a	3105422-7656327
	qFM-Chr06-1	Chr06	2018CQ	NAU3612	98.29	2.76	-0.25	2.3	DPL0257a-CCRI10846a	121378989-124474050
	qFM-Chr08-1	Chr08	2018CQ	CCRI06238	133.09	2.24	0.18	1.9	NAU5078-CCRI06217	121269318-124819609
	qFM-Chr09-1	Chr09	2018CQ	NAU3159a	34.83	2.93	-0.16	2.4	CCRI09260-CCRI05992	6881842-8284577
			2019CQ	NAU3159a	34.83	2.05	-0.12	1.9	CCRI09260-CCRI05992	6881842-8284577
	qFM-Chr09-2	Chr09	2018CQ	CCRI05266	45.7	3.1	-0.15	2.6	CCRI05992-BNL1672	8284577-62135680
	qFM-Chr12-1	Chr12	2018CQ	NAU4942	50.93	2.78	0.16	2.3	NAU5218-HAU1666	4543472-83872431
			2019CQ	NAU4942	50.93	3.06	0.16	2.8	CGR5111-SWU18358a	7217874-57732349
	qFM-Chr12-2	Chr12	2019XJ	NAU2671	122.03	3.04	-0.31	2.7	HAU1454-DPL0695c	101133695-104209836
	qFM-Chr14-1	Chr14	2018CQ	NAU0823	23.07	3.51	-0.2	2.9	SWU13946-SWU13978	2685200-4363465
			2019CQ	SWU13967	24.14	2.02	-0.14	1.8	NAU0823-SWU13978	3869974-4363465
	qFM-Chr14-2	Chr14	2018CQ	SWU14260	65.21	2.36	-0.19	1.9	CCRI12874-SWU14483	9015027-54299973
	qFM-Chr15-1	Chr15	2020CQ	SWU11035	35.27	2.44	-0.18	2.1	SWU10967b-SWU11073	2907406-7871531
	qFM-Chr17-1	Chr17	2019XJ	CCRI03807	52.24	2.43	-0.21	2.1	SWU12010-CCRI02966b	3280764-26177027
			2020CQ	SWU12062	53.39	2.1	-0.19	1.8	CCRI03807-CCRI02966b	4138706-26177027
	qFM-Chr17-2	Chr17	2018CQ	SWU12648b	59.86	8.55	-0.3	6.9	NAU2649-SWU12765b	28380381-48355755
			2019CQ	SWU12648b	59.86	6.49	-0.24	5.8	CCRI02966b-NAU2150	28380381-45393465
			2019XJ	SWU12648b	59.86	4.31	-0.23	3.8	NAU2649-NAU2150	28380381-45393465
			2020CQ	NAU2150	64.21	2.88	-0.18	2.4	NAU2649-HAU1648	28380381-49203384
	qFM-Chr18-1	Chr18	2018CQ	HAU1036	58.3	2.8	0.19	2.3	NAU5032b-CGR5021b	4950009-57748392
	qFM-Chr19-1	Chr19	2018CQ	SWU18068	71.35	3.75	-0.34	3.1	SWU17940-CCRI12943	10553151-17652436
			2019XJ	SWU18068	71.35	4.46	-0.43	3.9	SWU17940-CCRI12943	10553151-17652436
	qFM-Chr20-1	Chr20	2019CQ	CCRI07642	7.6	2.48	-0.26	2.3	CCRI07642-CCRI07880	2199024-2950015
	qFM-Chr22-1	Chr22	2018CQ	NAU2553	2.17	2.34	0.25	1.9	NAU2553-SWU20808	611722-2149127
	qFM-Chr23-1	Chr23	2018CQ	NAU2724	138.1	2.46	-0.14	2	HAU1661-NAU2724	49616389-51146830
	qFM-Chr24-1	Chr24	2019XJ	NAU4099	85.52	2.11	0.18	1.9	NAU5399-SWU13744	56846810-63081297
	qFM-Chr25-1	Chr25	2018CQ	SWU19804b	127.73	2.38	0.2	2	CCRI10846b-SWU19844	63280654-64899957
	qFM-Chr26-1	Chr26	2018CQ	HAU1942	16.69	2.54	-0.22	2.1	SWU16704-NAU4089	1919351-3930586
FE	qFE-Chr03-1	Chr03	2019XJ	CCRI03393	18.94	2.16	0.02	1.9	CCRI03869-NAU3839a	1821515-3920553
	qFE-Chr03-2	Chr03	2020CQ	CCRI03487	39.58	2.22	0.07	1.9	SWU12765a-CCRI03267	5917909-9430617
	qFE-Chr04-1	Chr04	2019XJ	HAU0035	66.91	2.18	0.02	1.9	BNL0530-HAU2724	80082101-85450590
	qFE-Chr05-1	Chr05	2018CQ	HAU1034	81.44	2.88	0.03	2.4	NAU5295-SWU18103	13051682-17383572
	qFE-Chr07-1	Chr07	2019CQ	CCRI00735	77.94	2.69	0.08	2.4	CCRI00581-CGR6815	17608555-51123829
	qFE-Chr08-1	Chr08	2018CQ	CCRI12469	51	2.34	-0.04	1.9	SWU13107a-CCRI06550	5646877-91912709
	qFE-Chr08-2	Chr08	2018CQ	GH390	78.54	2.81	-0.05	2.3	CCRI06550-CCRI06336	91912709-114328960
	qFE-Chr09-1	Chr09	2019CQ	SWU15536	146.19	2.43	-0.06	2.2	JESPR290-NAU3414a	76263717-80018311
	qFE-Chr11-1	Chr11	2019XJ	CIR254	23.29	4.75	0.04	4.1	NAU0980-HAU0848	168170-5486058
	qFE-Chr11-2	Chr11	2018CQ	SWU16031	112.17	2.05	0.05	1.7	NAU1103-CCRI02635	18345535-26101840
	qFE-Chr11-3	Chr11	2019XJ	NAU2152	192.35	3.42	0.02	3	CCRI08725-CCRI02586	111617012-119194780
	qFE-Chr12-1	Chr12	2018CQ	HAU1454	111.09	2.8	0.04	2.3	HAU3002-NAU2671	100289358-103465008
	qFE-Chr14-1	Chr14	2020CQ	NAU1159b	15.52	2.91	0.04	2.5	CCRI12417-SWU13946	979066-2685200
	qFE-Chr15-1	Chr15	2019CQ	SWU10912b	0	2.01	-0.05	1.8	SWU10903b-CCRI03295	239251-1570620
			2020CQ	SWU10903b	0	2.53	-0.04	2.1	SWU10903b-CCRI03295	239251-1570620
	qFE-Chr15-2	Chr15	2018CQ	CCRI03676	62.31	2.02	-0.04	1.7	HAU2528b-SWU11613	25920923-56852605
	qFE-Chr17-1	Chr17	2019XJ	SWU12010	45.71	2.15	-0.02	1.9	CCRI08269-SWU12042	3101874-4096953
aLP, lint percentage; FL, fiber length; FU, fiber uniformity; FS, fiber strength; FM, fiber micronaire; FE, fiber elongation
b2018CQ, 2018 in Chongqing; 2019CQ, 2019 in Chongqing; 2019XJ, 2019 in Xinjiang; 2020CQ, 2020 in Chongqing
cLOD, log of odds
dPVE, phenotypic variance explained
