# Supplementary material for: Identification of Candidate Genes for Lint Percentage and Fiber Quality Through QTL Mapping and Transcriptome Analysis in an Allotetraploid Interspecific Cotton CSSLs Population
Source: Front Plant Sci. 2022 Apr 29;13:882051. doi: 10.3389/fpls.2022.882051 (PMC9100888; doi:10.3389/fpls.2022.882051)
Supplement: Supplementary Table S7 — Summary of generated read data, quality control and mapping on the TM-1 genome for all samples. [file Table_7.XLSX]

## Sheet: Sheet1
Table S12 Expression level of candidate genes in QTL clusters during fiber development.
Cluster ID	Gene ID	CCRI35_0DPA	Pima S-7_0DPA	CCRI35_8DPA	Pima S-7_8DPA	CCRI35_18DPA	Pima S-7_18DPA	CCRI35_25DPA	Pima S-7_25DPA	CCRI35_32DPA	Pima S-7_32DPA
Cluster-Chr02-1	GH_A02G0289	5.14	6.8	3.17	2.95	0.46	0.49	0.15	0.18	0.21	0.33
Cluster-Chr02-1	GH_A02G0291	6.34	1.49	3.37	0.69	1.81	0.63	2.16	3.17	2.8	0.85
Cluster-Chr02-1	GH_A02G0294	0.93	0.38	0.54	0.16	1.1	0.1	0.36	0.14	1.14	0.04
Cluster-Chr02-1	GH_A02G0295	0.15	0.19	0.51	0.53	0.46	0.2	1.41	0.28	2.42	0.3
Cluster-Chr02-1	GH_A02G0297	2.68	3.57	1.58	2.22	0.24	0.41	0.21	3.45	4.3	9.83
Cluster-Chr02-1	GH_A02G0298	5.54	4.09	2.4	1.94	3.47	2.5	2.97	2.51	2.7	1.98
Cluster-Chr02-1	GH_A02G0299	10.83	6.86	8.66	5.81	8.6	6.08	9.13	8.99	10.55	7.45
Cluster-Chr02-1	GH_A02G0300	5.94	6.23	5.5	6.64	4.83	4.56	4.16	3.36	2.75	3.7
Cluster-Chr02-1	GH_A02G0309	5.33	6.49	2.57	2.43	2.09	1.33	11.01	7.92	10.07	9.26
Cluster-Chr02-1	GH_A02G0310	30.27	25.26	51.33	42.53	43.64	69.79	62.1	62.72	38.91	31.62
Cluster-Chr02-1	GH_A02G0311	6.26	7.16	0.9	1.49	0.19	1.14	1.76	10.07	1.45	4.01
Cluster-Chr02-1	GH_A02G0312	3.15	3.57	2	1.59	3.07	2	11.14	7.26	8.23	4
Cluster-Chr02-1	GH_A02G0313	24.96	21.21	35.35	42.1	54.14	56.96	32.41	33.67	30.43	35
Cluster-Chr02-1	GH_A02G0314	6	3.61	18.94	3.72	20.87	4.78	7.8	1.16	1.34	0.26
Cluster-Chr02-1	GH_A02G0315	4.25	3.31	1.68	1.27	0.74	0.77	0.8	0.14	0.17	0.92
Cluster-Chr02-1	GH_A02G0316	0.21	0.11	0.65	0.25	0.83	0.05	1	0.13	5.38	1.17
Cluster-Chr02-1	GH_A02G0317	22.38	25.27	13.52	11.72	11.49	10.76	5.96	3.46	6.02	2.95
Cluster-Chr02-1	GH_A02G0318	14.58	15.08	12.37	11.93	11.59	11.22	15.9	13.42	12.21	11.18
Cluster-Chr02-1	GH_A02G0319	9.46	15.72	10.92	12.75	11.76	13.92	7.92	5.67	3.38	0.94
Cluster-Chr02-1	GH_A02G0320	5.25	5.26	23.97	9.34	10.86	10.02	1.9	3.09	0.49	1.11
Cluster-Chr02-1	GH_A02G0321	10.6	14.21	6.93	7.11	8.34	10.62	6.83	6.69	8.4	6.94
Cluster-Chr02-1	GH_A02G0322	19.48	24.5	20.34	18.76	21.55	17.15	14.81	5.46	4.69	3.54
Cluster-Chr02-1	GH_A02G0323	8.83	11.66	13.27	11.97	13.2	12.39	19.3	17.56	20.34	17.63
Cluster-Chr02-1	GH_A02G0324	7.03	5.5	1.94	1.14	0.75	0.47	0.6	0.32	1.99	2.28
Cluster-Chr02-1	GH_A02G0325	0.52	0.38	0.52	0.9	9.8	16.08	31.3	73.99	27.2	41.85
Cluster-Chr02-1	GH_A02G0326	0.42	0.09	2.19	1.83	4.97	2.48	13.46	9.95	1.35	1.8
Cluster-Chr02-1	GH_A02G0327	1.47	1.21	17.48	2.19	16.02	0.72	1.94	1.12	8.4	1.31
Cluster-Chr02-1	GH_A02G0328	2.5	2.64	5.46	3.29	0.35	0.06	0.03	0.01	0	0
Cluster-Chr02-1	GH_A02G0329	1.46	2.69	2.92	2.62	0.52	0.31	0	0	0	0.03
Cluster-Chr02-1	GH_A02G0330	5.31	2.39	0.47	0.53	0.02	0.1	0.02	0.05	0.06	0
Cluster-Chr02-1	GH_A02G0331	46.21	33.09	9.08	10.33	2.83	3.05	1.71	1.32	5.59	3.52
Cluster-Chr02-1	GH_A02G0332	3.95	1.24	8.34	9.57	5.31	4.91	2.54	0.47	3.98	0.31
Cluster-Chr02-1	GH_A02G0334	8.89	7.42	16.73	16.93	16.24	19.9	17.15	18.29	17.89	20.79
Cluster-Chr02-1	GH_A02G0336	15.9	20.1	11.91	13.23	8.42	8.53	6.6	6.83	6.87	3.85
Cluster-Chr02-1	GH_A02G0337	61.28	52.94	46.29	38.95	36.45	35.34	30.52	26.74	25.34	24.03
Cluster-Chr02-1	GH_A02G0338	4.08	5.23	3.85	4.06	3.49	3.23	1.79	1.45	1.87	0.62
Cluster-Chr02-1	GH_A02G0342	63.34	72.32	40.81	41.86	43.72	43.02	38.08	38.23	29.34	25.89
Cluster-Chr02-1	GH_A02G0343	25.08	26.47	81.47	94.84	97.87	107.27	104.05	90.57	57.28	81.78
Cluster-Chr02-1	GH_A02G0345	0.1	0.32	4	11.13	11.04	140.48	34.15	202.91	5.91	64.46
Cluster-Chr02-1	GH_A02G0347	5	6.43	1.46	0.71	0.13	0.13	0.56	5.99	1.74	8.17
Cluster-Chr02-1	GH_A02G0348	3.73	0.04	6.82	8.95	40.35	11.69	669.93	721.99	2432.26	3226.62
Cluster-Chr02-1	GH_A02G0349	0.26	0.09	15.93	18.78	3.77	0.79	43.04	6.97	97.31	14.26
Cluster-Chr02-1	GH_A02G0350	2.15	0.78	2.89	4.41	81.36	10.88	646.83	907.71	1054.8	1409.49
Cluster-Chr02-1	GH_A02G0351	11.33	11.59	11.62	10.16	10.48	6.91	16.38	3.68	32.94	5.86
Cluster-Chr02-1	GH_A02G0352	0.29	0.43	0.04	0.08	0.03	0	1.1	0.09	0.21	0.04
Cluster-Chr02-1	GH_A02G0353	0.12	0.1	0.51	0.16	0.3	0.35	2.29	0.09	2.84	1.05
Cluster-Chr02-1	GH_A02G0354	0.11	0.35	0.11	0.02	0.29	0.19	0.66	0.08	1.4	0.38
Cluster-Chr02-1	GH_A02G0355	31.03	35.44	16.56	16.51	5.89	9.96	1.54	0.48	1.33	0.4
Cluster-Chr02-1	GH_A02G0357	7.28	6.13	0.93	1.45	0.7	0.43	0.46	0.31	0.67	0.33
Cluster-Chr02-1	GH_A02G0358	80.34	75.42	79.99	98.41	62.48	82.61	63.04	53.14	38.21	61.16
Cluster-Chr02-1	GH_A02G0360	31.93	30.37	8.03	7.18	1	1.65	0.36	0.38	1.35	0.29
Cluster-Chr02-1	GH_A02G0361	29.57	29.53	74.46	83.3	114.21	121.27	125.47	120.15	77.17	109.82
Cluster-Chr02-1	GH_A02G0365	5.2	5.18	1.25	0.92	0.62	0.79	1.11	0.95	1.15	1.62
Cluster-Chr02-1	GH_A02G0366	0.36	0.08	0.86	1.35	0.81	1.61	0.42	0.64	0.45	0.07
Cluster-Chr02-1	GH_A02G0367	1.06	0.14	0	0.22	0	0.02	0	0	0.16	0.03
Cluster-Chr02-1	GH_A02G0368	3.22	3.92	1.97	1.05	0.39	0.73	0.85	0.66	1.46	0.38
Cluster-Chr02-1	GH_A02G0370	0.54	0.11	0.84	0.75	0.68	1.28	2.97	2.31	5.51	2.27
Cluster-Chr02-1	GH_A02G0371	5.32	5.12	2.62	1.37	0.22	0.09	0.23	0.18	1.67	0.51
Cluster-Chr02-1	GH_A02G0372	1.03	2.71	3.5	6.1	4.51	6.76	0.38	0.16	0.38	0.44
Cluster-Chr02-1	GH_A02G0373	1.8	0.21	3.4	0.69	2.09	0.37	1.59	0.07	1.85	0.13
Cluster-Chr02-1	GH_A02G0374	4.79	5.45	3.07	3.45	2.2	2.67	2.99	2.54	2.16	1.61
Cluster-Chr02-1	GH_A02G0376	67.07	59.28	55.41	55.07	49.15	57.75	60.79	46.44	45.93	62.6
Cluster-Chr02-1	GH_A02G0378	6.52	7.64	1.57	1.86	0.7	0.82	0.5	0.47	0.88	0.3
Cluster-Chr02-1	GH_A02G0380	11.04	6.19	1.2	1.25	0.11	0.16	0.32	0.24	0.89	0.35
Cluster-Chr02-1	GH_A02G0382	10.09	8.73	2.16	2.19	1.52	1.35	0.76	0.68	0.15	0.26
Cluster-Chr02-1	GH_A02G0383	0	1.6	0	0.59	0	0.15	0	0.43	0	0.64
Cluster-Chr02-1	GH_A02G0384	12.64	17.66	8.53	9.56	7.54	7.43	4.8	4.75	5	3.4
Cluster-Chr02-1	GH_A02G0389	10.9	17.57	16.56	12.47	25.99	36.25	25.93	23.87	25.83	42.09
Cluster-Chr02-1	GH_A02G0391	4.47	6.13	3.73	3.74	1.38	1.64	0.29	0.12	0.21	0.06
Cluster-Chr02-1	GH_A02G0394	0.37	2.41	1.8	10.07	3.03	21.35	0.71	10.4	0.28	4.22
Cluster-Chr02-1	GH_A02G0395	27.57	28.11	40.35	38.97	43.15	42.39	39.14	27.02	24.46	26.5
Cluster-Chr02-1	GH_A02G0396	0.43	1.6	0.3	2	0.58	6.93	0.37	1.88	0.34	1.29
Cluster-Chr02-1	GH_A02G0403	5.92	1.93	1.66	0.95	2.67	1.54	2.67	0.75	5.87	1.47
Cluster-Chr02-1	GH_A02G0406	3.17	1.18	0.16	0.16	0.02	0.02	0.02	0	0.59	0.36
Cluster-Chr02-1	GH_A02G0407	1.31	1.21	0.33	0.47	0.02	0.16	0.08	0.02	0.34	0.43
Cluster-Chr02-1	GH_A02G0410	45.81	81.1	16542.2	15062.5	37836	19488.5	18051.4	20708.6	9010.25	8672.43
Cluster-Chr02-1	GH_A02G0411	22.26	2.87	0.44	0.11	0.89	0.1	0.16	0.03	6.38	0.17
Cluster-Chr02-1	GH_A02G0412	65.57	210.38	2.56	15.23	3.78	2.82	1.78	7.77	29.46	9.24
Cluster-Chr02-1	GH_A02G0414	4.25	0.23	10.55	15.41	12.22	6.04	6.95	19.44	80.21	17.93
Cluster-Chr02-1	GH_A02G0416	2.09	3.14	0.77	0.67	0.49	0.25	0.35	0.24	1.17	0.55
Cluster-Chr02-1	GH_A02G0417	5.73	4.66	4.09	1.6	2.23	0.74	2.26	1.3	2.79	0.88
Cluster-Chr02-1	GH_A02G0418	6.7	5.95	1.94	1.41	1.44	0.75	1.46	2.24	1.76	1.03
Cluster-Chr02-1	GH_A02G0419	94.33	89.87	260.86	479.81	192.36	468.05	239.98	378.41	194.04	269.42
Cluster-Chr02-1	GH_A02G0420	27.67	23.37	14.06	13	10.15	11.05	12.83	10.18	10.28	7.29
Cluster-Chr02-1	GH_A02G0422	9.62	7.63	52	67.23	31.46	40.01	23.2	55.44	58.01	99.11
Cluster-Chr02-1	GH_A02G0423	10.94	12.27	9.48	18.45	7.16	12.24	6.29	8.58	5.86	5.57
Cluster-Chr02-1	GH_A02G0424	6.57	12.23	1.4	2.86	1.45	2.65	0.92	1.97	0.44	0.67
Cluster-Chr02-1	GH_A02G0426	9.01	9.89	4.08	4.17	2.42	3.5	2.19	2.61	1.54	1.67
Cluster-Chr02-1	GH_A02G0427	45.71	28	57.1	40.86	49.04	36.93	59.2	30.61	33.85	30.35
Cluster-Chr02-1	GH_A02G0428	28.7	26.16	59.11	73.02	68.7	93.49	79.76	118.92	69.35	112.57
Cluster-Chr02-1	GH_A02G0429	17.33	15.48	3.7	4.41	1.65	1.28	0.75	0.32	0.5	0.07
Cluster-Chr02-1	GH_A02G0430	13.31	10.66	1.98	2.51	0.23	0.42	0.8	0.71	0.16	0.15
Cluster-Chr02-1	GH_A02G0431	0.04	0.12	0.11	0.09	0.23	1.1	0.26	0.51	3.75	1.38
Cluster-Chr02-1	GH_A02G0435	11.02	22.36	1.41	2.17	0.22	0.53	0.37	1.52	1.06	2.43
Cluster-Chr02-1	GH_A02G0436	10.46	10.31	3.27	3.91	1.46	2.07	1.56	0.66	2.12	1.69
Cluster-Chr02-1	GH_A02G0437	39.99	37.21	41.48	35.8	39.3	36.39	37.15	18.63	28.15	28.07
Cluster-Chr02-1	GH_A02G0439	1.04	1.31	7.4	4.37	1.09	1.08	2.16	0.66	4.89	3.89
Cluster-Chr02-1	GH_A02G0441	73.04	95.32	62.55	58.43	52.3	53.61	59.16	39.15	52.56	52.91
Cluster-Chr02-1	GH_A02G0445	22.57	21.22	20.85	17.19	16.79	17.92	21.12	12.44	16.91	11.31
Cluster-Chr02-1	GH_A02G0446	0.44	0.81	0.32	0.71	0.2	0.46	0.41	0.61	0.67	1.18
Cluster-Chr02-1	GH_A02G0447	20.05	17.13	33.41	35.38	49.17	50.07	71.61	67.48	65.61	91.22
Cluster-Chr02-1	GH_A02G0448	7.31	6.88	1.67	2.22	0.22	0.31	0.35	0.24	2.18	0.79
Cluster-Chr02-1	GH_A02G0450	7.82	8.33	6.21	5.75	4.6	5.79	6.17	6.65	5.01	4.43
Cluster-Chr02-1	GH_A02G0451	5.34	5.62	5.34	4.28	6.08	4.6	5.24	3.86	3.64	3.89
Cluster-Chr02-1	GH_A02G0453	13.33	10.54	6.44	7.3	5.41	4.82	3.26	2.6	2.49	2.22
Cluster-Chr02-1	GH_A02G0457	8.51	9.94	6.91	9.29	6.31	6.87	3.96	5	4.5	5.86
Cluster-Chr02-1	GH_A02G0462	1.37	1.63	0.42	0.53	0.2	0.37	0.2	0.38	0.2	0.17
Cluster-Chr02-1	GH_A02G0463	2.63	2.76	0.71	0.9	0.14	0.12	0.23	0.08	0.34	0.09
Cluster-Chr02-1	GH_A02G0464	9.12	9.77	4.6	2.23	7.3	0.93	2.42	1.76	6.56	4.02
Cluster-Chr02-1	GH_A02G0466	2.28	2.31	0.98	1.56	1.41	1.95	1.64	1.54	0.69	1.6
Cluster-Chr02-1	GH_A02G0467	3.61	2.98	1.49	1.24	0.7	0.42	0.2	0.27	0.74	0.16
Cluster-Chr02-1	GH_A02G0468	9.62	6.9	3.26	2.53	2.37	1.41	3.03	1.64	3.01	1.21
Cluster-Chr02-1	GH_A02G0470	5.06	6.09	1.92	1.67	0.84	1.18	0.56	0.66	0.6	0.45
Cluster-Chr02-1	GH_A02G0472	4.51	4.9	26.02	26.22	25.15	28.25	17.84	16.76	13.94	9.62
Cluster-Chr02-1	GH_A02G0473	5.83	7.43	7.04	6.85	7.02	8.75	5.91	4.06	3.76	4.19
Cluster-Chr02-1	GH_A02G0474	2.53	1.92	0.43	0.3	0.02	0.02	0.02	0	0.05	0
Cluster-Chr02-1	GH_A02G0475	2.51	3.03	0.81	1.06	0.07	0.25	0.03	0.09	0.11	0.11
Cluster-Chr02-1	GH_A02G0476	5.13	9.45	2.96	5.01	2.04	3.26	2.17	3.46	2.04	2.26
Cluster-Chr02-1	GH_A02G0478	1.15	0.9	0.67	0.57	0.82	0.97	0.54	0.94	0.47	0.82
Cluster-Chr02-1	GH_A02G0479	14.57	13.68	4.59	3.85	1.52	0.89	1.05	0.75	0.7	0.41
Cluster-Chr02-1	GH_A02G0480	35.08	36.44	11.49	12.03	5.72	6.26	6.54	5.92	8.17	5.74
Cluster-Chr02-1	GH_A02G0481	12.84	10.25	2.09	2.87	0.32	0.37	0.25	0.45	0.35	0.69
Cluster-Chr02-1	GH_A02G0482	16.5	18.5	24.91	14.04	7.6	4.76	7.58	3.12	3.01	3
Cluster-Chr02-1	GH_A02G0483	0.21	1.53	0.42	0.1	0.09	0.28	0.11	0	0	0.13
Cluster-Chr02-1	GH_A02G0485	0.09	0.48	0.35	0.29	0.11	0.2	0.2	0.22	0.26	1.46
Cluster-Chr02-1	GH_A02G0486	3.68	0.09	2.07	10.3	49.94	14.75	753.34	788.57	2414.23	3925.17
Cluster-Chr02-1	GH_A02G0488	0.17	0.25	2.84	1.94	4.62	8.72	21.1	44.94	17.29	40.9
Cluster-Chr02-1	GH_A02G0489	11.44	14.33	11	11.07	9.43	10.25	9.03	11.73	18.48	22.21
Cluster-Chr02-1	GH_A02G0492	0.7	2.59	0.05	0.33	0.14	0	0.05	0.08	0	0.22
Cluster-Chr02-1	GH_A02G0493	32.75	29	9.31	8.19	4.5	4.29	3.91	2.98	4.99	2.28
Cluster-Chr02-1	GH_A02G0497	23.4	23.72	8.5	8.66	3.59	3.61	3.1	2.22	4.95	2.74
Cluster-Chr02-1	GH_A02G0498	8.48	9.09	6.58	7.39	5.33	5.44	3.25	3.36	1.91	1.92
Cluster-Chr02-1	GH_A02G0499	7.06	8.63	3.89	5.6	3.86	4.2	1.94	1.85	1.32	1.09
Cluster-Chr02-1	GH_A02G0500	14.42	11.8	3.56	2.93	2.88	1.48	2.29	1.81	3.05	2.71
Cluster-Chr02-1	GH_A02G0502	10.13	10.61	3.58	3.43	1.43	1.37	2.45	2.18	4.24	3.9
Cluster-Chr02-1	GH_A02G0503	6.49	6.9	2.93	2.94	1.24	1.21	1.39	1.02	1.4	0.7
Cluster-Chr02-1	GH_A02G0504	0.1	0	0.37	0.1	0.61	0.09	1.16	0.05	0.52	0.03
Cluster-Chr02-1	GH_A02G0506	2.35	3.66	1.98	2.17	1.9	1.16	1.92	2.19	1.74	1.62
Cluster-Chr02-1	GH_A02G0508	1.03	1.23	42.3	35.48	68.62	32.32	28.96	9.28	4.9	5.38
Cluster-Chr02-1	GH_A02G0509	0.11	0.25	0.64	2.05	2.32	4.29	0.63	0.51	0.27	0.63
Cluster-Chr02-1	GH_A02G0510	13.14	15.9	1.99	3.42	0.33	0.8	0.27	0.18	0.24	0.15
Cluster-Chr02-1	GH_A02G0511	6.94	8.35	6.05	5.88	3	5.05	2.76	4.31	2.83	2.75
Cluster-Chr02-1	GH_A02G0512	304.33	393.99	269.57	349.96	203.17	363.43	237.86	362.69	180.18	219.15
Cluster-Chr02-1	GH_A02G0513	4.68	4.43	7.96	8.4	8.43	7.42	7.88	5.77	4.6	3.57
Cluster-Chr02-1	GH_A02G0514	1.19	0.59	0.23	0.31	0	0.03	0	0.02	0	0
Cluster-Chr02-1	GH_A02G0516	7.91	7.95	28.96	8.91	44.72	15.74	37.43	18.67	27.27	17.12
Cluster-Chr02-1	GH_A02G0517	0.05	0	2.67	3.04	0.05	0	0.18	0.18	3.7	1.1
Cluster-Chr02-1	GH_A02G0520	8.8	5.7	0.42	0.75	0.81	0.33	0.1	0.05	0.1	0.14
Cluster-Chr02-1	GH_A02G0521	13.87	13.02	1.49	2.21	0.25	0.24	0.06	0.13	0.18	0.36
Cluster-Chr02-1	GH_A02G0523	21.68	23.07	20.11	23.54	15.19	24.99	21.61	22.58	26.44	32.81
Cluster-Chr02-1	GH_A02G0525	131.8	112.12	74.61	94.53	50.52	77.68	63.52	55.46	45.49	61.03
Cluster-Chr02-1	GH_A02G0526	0.23	0.3	2.57	1.63	2.08	2.1	1.4	1.42	1.43	0.94
Cluster-Chr02-1	GH_A02G0527	0.66	2.03	0.2	0.3	0.72	0.48	7.27	25.8	87.12	64.62
Cluster-Chr02-1	GH_A02G0529	12.01	11.73	23.93	27.28	23.57	26	26.59	24.15	23.63	19.24
Cluster-Chr02-1	GH_A02G0532	0.13	0.06	1.6	0.69	1.91	0.46	1	0.05	0.73	0
Cluster-Chr02-1	GH_A02G0535	0	0	0	0	0.12	0	0.14	0	1.15	0.35
Cluster-Chr02-1	GH_A02G0536	0	0.05	7.21	0.05	14.81	0.12	6.64	0	1.44	0
Cluster-Chr02-1	GH_A02G0537	4.12	0	1.47	0.04	1.45	0	1.67	0	1.68	0.05
Cluster-Chr02-1	GH_A02G0552	14.14	17.19	9.07	14.77	11.42	18.44	25.77	27.53	25.81	34.77
Cluster-Chr02-1	GH_A02G0553	14.95	10.59	34.22	38.36	31.25	26.42	30	29.3	21.64	17.63
Cluster-Chr02-1	GH_A02G0554	38.24	39.1	4.99	5.87	0.76	0.84	1.35	1.29	1.78	1.76
Cluster-Chr02-1	GH_A02G0555	33.15	32.54	35.39	33.49	30.5	31.88	34.62	24.48	25.59	22.64
Cluster-Chr02-1	GH_A02G0557	6.4	5.83	5.04	2.93	1.86	1.03	0.73	0.22	1.23	0.47
Cluster-Chr02-1	GH_A02G0559	14.71	20.24	7.57	8.49	3.22	5.34	6.33	5.88	8.44	6.36
Cluster-Chr02-1	GH_A02G0560	17.12	10.22	9.11	4.01	6	3.94	7.74	1.32	5.86	1.72
Cluster-Chr02-1	GH_A02G0561	14.75	15.47	7.42	6.13	4.9	4.26	4.97	4.35	6.12	3.8
Cluster-Chr02-1	GH_A02G0564	16.53	15.61	2.24	2.38	0.29	0.35	0.39	0.22	0.44	0.2
Cluster-Chr02-1	GH_A02G0570	30.21	29.56	12.89	13.24	10.23	11.28	11.21	12.05	9	12.71
Cluster-Chr02-1	GH_A02G0571	5.72	4.54	12.49	16.26	13.75	15.84	14.09	12.41	8.91	5.92
Cluster-Chr05-1	GH_A05G1427	1.34	0.85	0.6	0.36	0.17	0.15	0.09	0.04	0.23	0.16
Cluster-Chr05-1	GH_A05G1429	34.22	28.15	57.9	52.93	57.58	63.71	57.72	46.68	46.41	38.91
Cluster-Chr05-1	GH_A05G1430	11.42	5.51	1.92	1.95	1.84	4.57	2.2	1.6	4.7	4.67
Cluster-Chr05-1	GH_A05G1431	6.53	7.68	10.17	2.93	4.64	2.14	0.42	0.77	1.3	0.1
Cluster-Chr05-1	GH_A05G1432	21.6	20.55	15.55	15.62	8.64	12.18	5.87	6.59	5.96	4.19
Cluster-Chr05-1	GH_A05G1433	4.07	4.63	7.29	5.17	7.13	6.04	4.19	2.86	1.4	0.79
Cluster-Chr05-1	GH_A05G1435	11.47	12	3.43	3.49	1.5	1.82	1.97	1.61	2.01	0.8
Cluster-Chr05-1	GH_A05G1436	41.86	45.52	49.19	54.3	54.21	69.74	53.62	50.43	35.79	40.9
Cluster-Chr05-1	GH_A05G1437	18.28	28.01	2.01	4.04	0.49	0.81	0.42	0.87	1.58	1.03
Cluster-Chr05-1	GH_A05G1439	5.77	3.3	0.5	0.81	0.1	0.19	1.01	2.29	2.81	1.5
Cluster-Chr05-1	GH_A05G1440	1.07	1.59	1.07	0.94	0.13	0.31	0.11	0.15	0.22	0.15
Cluster-Chr05-1	GH_A05G1441	2.03	4.04	3.31	2.33	3.45	1.35	1.3	0.41	0.54	0.22
Cluster-Chr05-1	GH_A05G1442	1.77	1.23	0.26	0.05	0.52	0.02	0.23	0.06	0.07	0.03
Cluster-Chr05-1	GH_A05G1443	1.26	1.16	0.6	0.38	0.87	0.22	1.48	0.61	1.77	0.7
Cluster-Chr05-1	GH_A05G1444	0.64	0.79	1.02	0	0.14	0.29	0.17	0	0.83	0.44
Cluster-Chr05-1	GH_A05G1445	7.47	8.37	2.15	2.06	1.37	1.17	1.56	0.61	2.72	1.48
Cluster-Chr05-1	GH_A05G1446	11.59	9.01	7.9	8.25	6.48	10.85	10.94	19.61	9.45	34.48
Cluster-Chr05-1	GH_A05G1447	3.89	5.14	8.1	6.53	4.41	7.42	2.2	6.93	1.74	3.6
Cluster-Chr05-1	GH_A05G1450	2.43	1.94	7.97	6.01	9.15	3.13	3.06	1.54	2.49	1.96
Cluster-Chr05-1	GH_A05G1452	4.28	3.66	0.29	0.22	0	0	0	0	0	0.02
Cluster-Chr05-1	GH_A05G1453	13.06	19.98	16.26	14.71	12.6	12.44	12.3	7.5	10.46	11.61
Cluster-Chr05-1	GH_A05G1454	0	1.89	0.05	0.11	0.03	0.08	0	0	0	0.01
Cluster-Chr05-1	GH_A05G1455	4.66	2.66	1.49	0.68	0.64	0.45	0.25	0.36	0.48	1.09
Cluster-Chr05-1	GH_A05G1456	0.5	0.5	1.53	5.28	3.45	8.44	4.88	16.6	4.66	10.02
Cluster-Chr05-1	GH_A05G1457	30.58	36.69	22.99	19.36	11.72	15.16	15.94	22.08	14.76	18.69
Cluster-Chr05-1	GH_A05G1459	17.51	20.05	4.35	4.02	0.97	0.47	6	4.46	3.3	10.29
Cluster-Chr05-1	GH_A05G1460	17.68	23.52	11.68	14.37	18.46	21.53	99.96	96.89	79.97	120.66
Cluster-Chr05-1	GH_A05G1462	8.42	5.16	2.47	0.82	1.64	0.6	1.84	0.62	2.1	0.44
Cluster-Chr05-1	GH_A05G1463	7.03	8.53	7.05	5.77	2.81	5.71	2.95	2.74	3.21	2.6
Cluster-Chr05-1	GH_A05G1464	12.6	11.66	3.2	2.55	0.25	0.25	0.3	0.13	0.52	0.45
Cluster-Chr05-1	GH_A05G1466	11.13	10.57	6.01	12.59	6.59	13.73	5.17	5.38	3.27	5.68
Cluster-Chr05-1	GH_A05G1467	4.73	4.15	2.47	3.18	1.63	1.96	0.43	0.47	0.53	0.3
Cluster-Chr05-1	GH_A05G1468	5.1	4.14	23.04	16.11	22.3	16.65	1.82	1.57	0.98	0.16
Cluster-Chr05-1	GH_A05G1469	26.96	20.2	21.46	16.33	16.09	15.42	12.5	12.3	11.99	9.09
Cluster-Chr05-1	GH_A05G1471	21.1	21.64	66.57	50.66	94.68	90.29	42.7	38.16	15.86	33.78
Cluster-Chr05-1	GH_A05G1472	8.23	8.46	4.41	2.51	2.25	0.92	1.81	0.3	1.91	0.97
Cluster-Chr05-1	GH_A05G1473	17.92	19.16	4.41	3.25	0.68	0.43	0.42	0.17	1.67	0.24
Cluster-Chr05-1	GH_A05G1474	6.92	8.9	2.24	1.27	0.32	0.2	0.26	0.17	0.68	0.29
Cluster-Chr05-1	GH_A05G1475	7.98	8.65	15.6	17.67	25.68	32.51	4.91	2.07	1.46	0.51
Cluster-Chr05-1	GH_A05G1476	3.58	6.12	4.29	5.69	3.79	4.68	3.2	2.85	1.94	1.97
Cluster-Chr05-1	GH_A05G1479	26.86	29.96	27.44	30.64	29.97	38.26	31.84	28.23	19.39	17.37
Cluster-Chr05-1	GH_A05G1481	32.61	17.57	8.28	5.25	0.07	0.24	0.28	0.13	0.3	0.04
Cluster-Chr05-1	GH_A05G1482	20.32	20.63	10.28	11.09	6.02	8.89	5.9	6.19	5.14	3.98
Cluster-Chr05-1	GH_A05G1483	58.01	45.29	40.94	43.72	18.11	17.66	5.91	2.27	14.79	2.66
Cluster-Chr05-1	GH_A05G1484	8.97	8.88	7.91	4.04	6.65	3.08	13.32	14.68	16.91	7.34
Cluster-Chr05-1	GH_A05G1486	27.27	34.59	14.35	14.39	25.15	20.85	53.35	27.2	33.88	24.81
Cluster-Chr05-1	GH_A05G1488	3.42	4	2.04	1.24	1.49	1.65	1.77	0.53	1.7	1.52
Cluster-Chr05-1	GH_A05G1489	18.08	20.95	20.52	15.18	15.04	10.05	14.56	9.98	9.66	10.7
Cluster-Chr05-1	GH_A05G1494	0.7	6.78	11.44	9.73	3.29	7.33	2.77	4.42	1.08	3.33
Cluster-Chr05-1	GH_A05G1496	9.52	10.06	21.53	17.7	15.1	18.84	17.15	23.91	15.67	16.19
Cluster-Chr05-1	GH_A05G1497	0.47	0.66	0.26	16.44	1.77	6.78	0.08	0.25	0.05	0.01
Cluster-Chr05-1	GH_A05G1498	5.46	6.08	4.45	3	3.46	3.05	2.85	0.81	2.08	2.5
Cluster-Chr05-1	GH_A05G1499	21.2	23.42	3.94	5.71	2.03	3.41	0.82	0.68	1.99	1.83
Cluster-Chr05-1	GH_A05G1500	4.79	5.88	6.28	9.05	4.82	7.34	3.74	5.82	3.64	2.59
Cluster-Chr05-1	GH_A05G1501	4.34	0.89	2.87	0.43	0.23	0.08	0.07	0.08	0.81	0.06
Cluster-Chr05-1	GH_A05G1502	19.34	14.03	7.37	7.05	4.87	5.72	3.26	3.31	3.14	1.95
Cluster-Chr05-1	GH_A05G1505	21.19	11.91	2.65	1.51	0.39	0.11	0.42	0.08	0.17	0.09
Cluster-Chr05-1	GH_A05G1506	9.15	8.77	77.78	81.48	55.92	62.7	31.23	37.13	22.16	17.88
Cluster-Chr05-1	GH_A05G1507	1.68	2.25	2.02	1.4	1.38	1.65	2.14	1.78	1.72	1.46
Cluster-Chr05-1	GH_A05G1508	36.6	39.16	31.01	21.22	21.28	29.22	19.98	26.97	14.33	7.5
Cluster-Chr05-1	GH_A05G1511	42.88	7.79	13.01	5.12	8.97	4.18	27.39	70.33	76.31	43.09
Cluster-Chr05-1	GH_A05G1513	0.14	0	0.28	0.06	0.27	0.03	0.2	2.2	0.34	0
Cluster-Chr05-1	GH_A05G1514	32.57	34.27	25.3	25.94	16.65	18.16	13.41	13.79	13.19	8.91
Cluster-Chr05-1	GH_A05G1515	5.95	6.54	2.09	2.2	1.43	2.24	1	0.89	2.17	1.09
Cluster-Chr05-1	GH_A05G1517	12.99	9.08	4.85	2.96	2.47	1.72	2.81	1.95	3.62	1.37
Cluster-Chr05-1	GH_A05G1518	17.13	24.86	8.99	8.25	6.45	3.23	4.26	1.68	2.99	1.78
Cluster-Chr05-1	GH_A05G1519	42.2	37.3	75.97	83.01	100.53	126.67	118.96	113.94	65.18	99.98
Cluster-Chr05-1	GH_A05G1520	8.32	7.73	2.28	1.84	1.59	1.09	1.36	1.5	1.42	0.76
Cluster-Chr05-1	GH_A05G1522	10.08	9.78	7.74	4.73	3.44	3.44	1.14	0.46	2	0.85
Cluster-Chr05-1	GH_A05G1524	3.21	4.95	2.28	2.25	8.08	2.49	17.34	8.7	8.31	7.27
Cluster-Chr05-1	GH_A05G1525	37.87	37.71	12.7	14.61	8.29	10.75	7.01	6.08	9.83	11.36
Cluster-Chr05-1	GH_A05G1527	0.82	4.91	0.27	0.21	0.1	0.26	0	0.06	0.13	4.01
Cluster-Chr05-1	GH_A05G1528	2.65	3.24	1.87	2.61	1.04	1.21	1.23	1.82	1.16	1.79
Cluster-Chr05-1	GH_A05G1529	0.35	0.2	1.54	10.03	2.56	13.99	0.47	1.89	2.84	1.34
Cluster-Chr05-1	GH_A05G1530	7.17	7.5	2.1	1.73	0.9	1.84	1.92	2.62	4.2	2.09
Cluster-Chr05-1	GH_A05G1531	15.75	13.87	19.75	61.23	2.23	15.63	0.58	2.46	1.1	1.09
Cluster-Chr05-1	GH_A05G1532	4.79	5.82	2.73	2.64	1.22	1.45	2.11	0.97	1.88	0.78
Cluster-Chr05-1	GH_A05G1533	3.96	5.82	1.02	1.53	0.99	1.32	0.48	0.32	1.07	0.54
Cluster-Chr05-1	GH_A05G1534	2.37	1.5	0.46	0.65	0.18	0.55	0.19	0.17	0.45	0.1
Cluster-Chr05-1	GH_A05G1535	1.67	0.35	4.14	0.31	0.68	0.06	2.27	0.44	1.41	0.38
Cluster-Chr05-1	GH_A05G1537	26.86	30.84	23.08	24.3	20.36	22.04	22	25.02	16.28	16.81
Cluster-Chr05-1	GH_A05G1538	15.32	7.26	1.23	2.18	0.11	0.54	0.19	0.18	2.07	0.15
Cluster-Chr05-1	GH_A05G1539	15.92	16.28	22.75	29.41	14.94	32.32	14.92	27.02	16.42	12.82
Cluster-Chr05-1	GH_A05G1542	26.57	26.43	47.22	56.07	32.77	45.21	27.96	20.84	9.17	3.94
Cluster-Chr05-1	GH_A05G1544	25.3	5.69	0.39	0.27	0	0.04	0.05	0	0	0.05
Cluster-Chr05-1	GH_A05G1545	6.1	3.34	0.69	0.2	0.06	0.05	0.26	0.13	0.61	0.1
Cluster-Chr05-1	GH_A05G1546	8.02	9.28	68.93	74.96	53.11	33.64	21.49	31.3	5.71	2.68
Cluster-Chr05-1	GH_A05G1547	63.08	64.43	22.1	26.34	11.66	24.02	10.65	8.94	10.01	10.2
Cluster-Chr05-1	GH_A05G1549	6.28	14.45	1.22	3.04	0.08	0.47	0.14	0.09	0.32	0.08
Cluster-Chr05-1	GH_A05G1552	0.75	1.52	4.29	6.4	2.11	1.84	1.06	0.02	1.29	0
Cluster-Chr05-1	GH_A05G1559	2.2	1.94	0.38	0.34	0.13	0.09	0.08	0.21	5.38	2.88
Cluster-Chr05-1	GH_A05G1561	18.21	17.84	22.06	22.69	23.29	24.4	43.92	48.92	41.84	80.66
Cluster-Chr05-1	GH_A05G1564	1.34	2.73	0.69	0.5	0.33	0.22	0.13	0.12	1.38	0.3
Cluster-Chr05-1	GH_A05G1565	5.34	5.81	4.34	4.42	4.01	5.24	4.15	2.82	3.17	3
Cluster-Chr05-1	GH_A05G1566	12.3	10.88	2.05	2.02	0.67	0.6	1.02	0.05	0.74	0
Cluster-Chr05-1	GH_A05G1567	14.14	11.86	12.5	6.89	4.44	3.78	3.52	2.58	2.66	1.4
Cluster-Chr05-1	GH_A05G1572	32.74	61.21	21.5	35.76	9.31	28.62	10.22	9.73	5.59	1.89
Cluster-Chr05-1	GH_A05G1573	2.51	2.95	1.22	1.38	1.03	1.07	0.88	0.81	0.92	0.53
Cluster-Chr05-1	GH_A05G1576	1.51	0.48	0	0.13	0	0	0	0	0	0
Cluster-Chr05-1	GH_A05G1577	10.31	12.07	46.95	66.22	115.77	106.13	188.81	151.37	69.42	46.77
Cluster-Chr05-1	GH_A05G1579	0.21	0.73	0.06	0.92	0.05	2.01	0.02	0	0	0
Cluster-Chr05-1	GH_A05G1581	1.2	1.89	0.47	3.72	0.59	2.38	0.12	1.16	0.19	0.31
Cluster-Chr05-1	GH_A05G1582	0.83	1.37	0.62	0.4	0.12	0	0	0.04	0.03	0
Cluster-Chr05-1	GH_A05G1584	115.83	126.6	524.64	811.9	187.17	176.3	20.11	27.3	8.01	5.36
Cluster-Chr05-1	GH_A05G1585	4.1	4.07	3.51	1.37	2.16	2.14	0.18	0.18	0.64	0.35
Cluster-Chr05-1	GH_A05G1590	8.89	9.25	9.16	8.84	7.29	10.01	9.76	10.2	9.67	8.72
Cluster-Chr05-1	GH_A05G1591	5	5.69	9.39	4.07	6.86	3.51	2.19	1.37	0.35	0.51
Cluster-Chr05-1	GH_A05G1592	18.06	17.79	25.66	25.79	44.21	48.22	51.75	45.82	56.72	55.85
Cluster-Chr05-1	GH_A05G1593	15.9	23.42	9.08	14.16	18.68	30.1	11.83	8.2	4.79	3.48
Cluster-Chr05-1	GH_A05G1594	0.49	0.07	0.1	0	0	0.11	0.12	0.56	2.68	2.58
Cluster-Chr05-1	GH_A05G1595	0.2	0.24	0.79	0.99	0.68	0.56	27.39	90.75	65.7	75.72
Cluster-Chr05-1	GH_A05G1596	0.08	0	0.11	0.18	0.06	0.02	3.49	10.76	11.86	18.37
Cluster-Chr05-1	GH_A05G1597	12.45	17.88	1.62	1.66	0.35	0.45	0.19	0.2	0.78	0.15
Cluster-Chr05-1	GH_A05G1598	2.1	2.31	0.96	1.06	0.78	1.34	0.48	0.58	0.72	0.36
Cluster-Chr05-1	GH_A05G1599	17.93	20.72	64.75	39.1	104.65	119.48	159.43	96.53	92.3	126.66
Cluster-Chr05-1	GH_A05G1600	14.17	15.41	13.52	13.14	8.6	10.87	6.3	8.19	4.34	3.6
Cluster-Chr05-1	GH_A05G1601	3.83	2.62	1.51	1.54	1.79	2.47	1.84	1.54	1.53	0.62
Cluster-Chr05-1	GH_A05G1602	166.03	156.46	7801.35	8771.29	18943.7	12207.5	13403.8	12524.3	5766.6	5068.11
Cluster-Chr05-1	GH_A05G1603	6.06	6.91	8.01	9.97	8.79	13.41	7.25	10.96	2.33	2.2
Cluster-Chr05-1	GH_A05G1604	24.57	21.72	12.3	8.15	11.19	10.2	14.27	12.34	26.19	48.99
Cluster-Chr05-1	GH_A05G1605	0.22	0.18	2.4	0.76	4.89	1.93	1.12	0.46	0.51	0.24
Cluster-Chr05-1	GH_A05G1606	24.01	10.95	36.09	13.3	46.96	32.89	52.53	52.75	75.7	94.16
Cluster-Chr05-1	GH_A05G1607	13.02	15.87	9.01	9.71	6.63	6.83	5.39	5.27	6.13	3.67
Cluster-Chr05-1	GH_A05G1608	10.61	5.99	9.03	9.86	15.69	11.24	8.94	9.91	8.82	9.61
Cluster-Chr05-1	GH_A05G1609	20.81	18.16	50.61	59.79	36.69	65.61	41.67	49.24	32.71	33.05
Cluster-Chr05-1	GH_A05G1610	2.41	1.31	8.98	9.4	12.87	10.34	13.83	10.87	5.97	3.5
Cluster-Chr05-1	GH_A05G1611	10.12	8.23	16.41	14.78	43.23	57.89	28.56	14.85	4.8	2.61
Cluster-Chr05-1	GH_A05G1612	72.23	70.18	23.73	22.82	18.98	19.1	21.02	13.84	18.01	16.39
Cluster-Chr05-1	GH_A05G1613	9.78	8.52	4.04	3.81	1.67	1.3	1.27	0.59	1.62	0.61
Cluster-Chr05-1	GH_A05G1616	7.05	7.62	2.48	1.76	0.51	0.42	0.32	0.23	0.94	0.42
Cluster-Chr05-1	GH_A05G1617	29.55	27.24	5.01	10.64	4.88	4.44	4.74	2.88	3.81	2.72
Cluster-Chr05-1	GH_A05G1618	5.91	9.94	3.08	2.94	0.81	0.63	0.31	0.68	0.31	0.17
Cluster-Chr05-1	GH_A05G1619	4.81	5.81	12.68	15.5	13.45	17.03	17.53	15.91	13.69	11.7
Cluster-Chr05-1	GH_A05G1620	40.75	36.13	5.88	6.08	1.11	1.4	1.27	0.92	3.56	1.38
Cluster-Chr05-1	GH_A05G1621	2.94	2.78	0.69	0.57	0.32	0.32	0.13	0.17	0.28	0.16
Cluster-Chr05-1	GH_A05G1622	0.81	1.48	2.7	3.23	3.48	4.54	2.41	2.83	1.84	1.11
Cluster-Chr05-1	GH_A05G1623	9.86	11	8.33	8.45	3.68	5.23	4.35	4.86	3.5	3.01
Cluster-Chr05-1	GH_A05G1624	18.52	20.96	4.74	5.78	1.29	1.26	2.14	1.59	3	2
Cluster-Chr05-1	GH_A05G1626	3.07	1.37	0.57	0.82	1.11	0.29	0.41	1.03	0.58	0.43
Cluster-Chr05-1	GH_A05G1627	11.11	11.34	11.94	8.03	24.71	19.36	30.95	39.35	28.26	25.51
Cluster-Chr05-1	GH_A05G1629	1.78	1.17	0.66	0.33	0.24	0.1	0.46	0.22	4.24	2.27
Cluster-Chr05-1	GH_A05G1630	7.87	6.68	9.94	10.73	12.65	11.21	6.14	3.28	1.72	1.15
Cluster-Chr05-1	GH_A05G1631	10.84	9.45	16.39	17.28	19.77	20.03	7.98	7.14	7.09	1.94
Cluster-Chr05-1	GH_A05G1633	3.33	4.02	0.49	2.2	0.57	1.19	0.06	0.1	0	0
Cluster-Chr05-1	GH_A05G1637	5.2	5.49	5.73	6.25	6.03	6.33	4.88	7.13	7.2	3.61
Cluster-Chr05-1	GH_A05G1639	9.06	8.38	4.92	5.31	5.07	3.25	2.98	2.82	3.62	2.07
Cluster-Chr05-1	GH_A05G1642	1.58	1.64	1.19	2.79	2.63	2.17	1.89	2.37	0.12	0.24
Cluster-Chr05-1	GH_A05G1643	56.41	68.41	11.17	23.7	3.9	3.67	0.14	0.62	0.14	0.03
Cluster-Chr05-1	GH_A05G1644	9.43	8.61	1.36	1.14	0.17	0.13	0.51	0.17	1.4	1.02
Cluster-Chr05-1	GH_A05G1645	12.09	14.95	9.92	7.18	7.91	8.77	6.46	11.6	19.17	16.06
Cluster-Chr05-1	GH_A05G1646	15.72	17.67	14.35	10.12	8.43	6.17	17.44	9.12	29.39	26.33
Cluster-Chr05-1	GH_A05G1647	14.6	15.22	4.89	2.81	1.1	1.84	0.55	0.14	1.34	0.16
Cluster-Chr05-1	GH_A05G1648	2.35	3.46	0.87	0.9	0.84	1.02	0.34	0.55	0.63	0.28
Cluster-Chr05-1	GH_A05G1649	13.71	14.69	2.41	1.54	0.47	0.31	0.4	0.13	1.55	0.61
Cluster-Chr05-1	GH_A05G1651	29.7	26.24	17.29	16.08	12.15	13.97	15.21	14.13	19.48	17.73
Cluster-Chr05-1	GH_A05G1654	2.76	2.85	0.33	0.42	0.24	0.34	0.42	0.09	0.35	0.18
Cluster-Chr05-1	GH_A05G1655	17.59	30.43	155.93	155.74	317.71	317.06	210.46	161.17	56.69	39.23
Cluster-Chr05-1	GH_A05G1656	37.12	36.53	22.13	19.82	13	13.21	13.34	11.37	13.11	8.96
Cluster-Chr05-1	GH_A05G1657	2.17	2	1.29	1.1	1.21	1.17	5.63	5.13	9.74	8.51
Cluster-Chr05-1	GH_A05G1658	21.62	30.41	12.13	13.2	10.57	10.82	10.79	9	13.5	10.22
Cluster-Chr05-1	GH_A05G1659	1.39	1.77	2.79	1.82	2.04	1.13	1.6	0.99	1.14	0.92
Cluster-Chr05-1	GH_A05G1660	28.01	28.9	17.31	22.31	13.68	18.94	14.41	14.51	10.53	16.61
Cluster-Chr05-1	GH_A05G1661	1.12	1.1	1.15	0.5	0.43	0.21	0.17	0.09	0.25	0.15
Cluster-Chr05-1	GH_A05G1662	0.76	2.01	2.14	1.6	2.32	2.38	1.72	0.4	0.6	0.56
Cluster-Chr05-1	GH_A05G1663	9.87	9.08	11.78	14.34	9.04	11.34	9.83	8.08	5.79	6.23
Cluster-Chr05-1	GH_A05G1665	10.64	10.3	4.67	4.9	2.07	0.95	1.33	0.56	5.04	2.38
Cluster-Chr05-1	GH_A05G1666	10.71	5.87	33.26	41	63.62	50.4	56.94	74.38	66.63	44.56
Cluster-Chr05-1	GH_A05G1668	23.25	22.88	6.82	6.44	6.73	4.56	10	10.73	4.71	3.1
Cluster-Chr05-1	GH_A05G1669	1.22	2.25	1.85	2.68	1.29	1.74	1.3	1.14	1.26	1.62
Cluster-Chr05-1	GH_A05G1671	0.27	0.2	0.44	0.04	0.32	0.24	0.76	0.85	0.76	3.14
Cluster-Chr05-1	GH_A05G1673	1.17	1.55	0.39	0.71	0.36	0.31	16.62	25.81	31.51	32.66
Cluster-Chr05-1	GH_A05G1674	1.63	1.45	0.22	0.2	1.83	0.11	0.56	0.05	0	0
Cluster-Chr05-1	GH_A05G1675	5.27	10.92	3.69	4.34	1.85	1.42	0.97	0.36	1.66	0.45
Cluster-Chr05-1	GH_A05G1680	6.85	3.5	2.07	1.68	3.08	2.8	3	2.82	1.36	0.56
Cluster-Chr05-1	GH_A05G1681	946.97	391.07	684.02	1458.04	513.33	643.48	150.42	301.43	49.08	75.69
Cluster-Chr05-1	GH_A05G1684	17	13.38	2.85	3.05	0.69	0.91	0.6	0.57	0.29	0.06
Cluster-Chr05-1	GH_A05G1685	18.86	16.45	8.12	5.82	2.97	2.29	49.34	30.35	76.31	107.53
Cluster-Chr05-1	GH_A05G1686	10.99	12.07	8.45	8.79	9.22	8.47	21.92	39.3	34.44	42.15
Cluster-Chr05-1	GH_A05G1687	1.61	0.96	0.37	0.2	0.03	0.03	0.03	0	0.08	0.11
Cluster-Chr05-1	GH_A05G1689	1.5	1.6	0.52	0.51	0.08	0.22	0.07	0.24	0.12	0.72
Cluster-Chr05-1	GH_A05G1690	2.86	4.53	1.79	1.19	1.14	0.8	0.63	0.23	0.71	0.39
Cluster-Chr05-1	GH_A05G1691	7.9	7.98	6.33	6.33	4.71	4.32	5.1	4.07	7.52	5.76
Cluster-Chr05-1	GH_A05G1692	1.29	0.85	0.46	0.45	0.38	0.95	0.13	0.92	1.34	5.96
Cluster-Chr05-1	GH_A05G1694	10.67	6.06	1.78	0.91	0.1	0.09	0.5	0.48	5.39	2.59
Cluster-Chr05-1	GH_A05G1695	5.97	6.44	1.55	1.83	0.52	0.79	0.34	0.18	0.66	0.32
Cluster-Chr05-1	GH_A05G1696	5.73	6.04	1.53	1.74	0.38	1.14	0.34	0.8	0.9	0.54
Cluster-Chr05-1	GH_A05G1697	16.85	15.15	54.35	71.94	49.52	60.12	16.43	8.24	7.2	7.18
Cluster-Chr05-1	GH_A05G1698	14.99	13.49	20.17	19.52	22.77	25.58	29.89	24.27	37.76	30.9
Cluster-Chr05-1	GH_A05G1699	12.24	11.8	1.54	1.4	0	0.14	0.09	0	0	0
Cluster-Chr05-1	GH_A05G1701	6.51	7.03	4.45	4.88	3.94	4.4	3.15	3.76	2.06	2.02
Cluster-Chr05-1	GH_A05G1702	1.77	1.95	0.61	0.92	0.4	0.4	0.25	0.14	0.12	0.04
Cluster-Chr05-1	GH_A05G1703	10.32	12.22	20.29	21.36	24.54	26.77	31.99	30.65	27.55	32.94
Cluster-Chr05-1	GH_A05G1704	0.32	0.08	0.83	6.41	0.3	1.94	0.43	0.07	0	0.28
Cluster-Chr05-1	GH_A05G1705	4.16	5.03	1.1	1.22	0.04	0	0.08	0.04	0.13	0.12
Cluster-Chr05-1	GH_A05G1706	0.25	0.07	0.06	0	0	0	0	0.06	1.51	8.2
Cluster-Chr05-1	GH_A05G1707	25.08	35.37	4.83	7.13	1.15	1.12	5.27	1.02	3.37	3.44
Cluster-Chr05-1	GH_A05G1708	1006.89	1378.24	375.96	349.63	21	39.93	10.54	18.61	20.05	9.62
Cluster-Chr05-1	GH_A05G1709	4.51	7.28	3.21	4.09	1.23	2.66	1.12	1.28	1.13	0.51
Cluster-Chr05-1	GH_A05G1710	17.63	19.9	9.65	10.6	4.78	5.79	4.23	6.54	7.32	9.69
Cluster-Chr05-1	GH_A05G1711	11.61	14.31	5.03	5.01	2.43	3.13	3.09	3.82	4.63	3.64
Cluster-Chr05-1	GH_A05G1712	0.73	0.1	0.15	0.31	0.26	0.25	0.23	0	1.55	0.77
Cluster-Chr05-1	GH_A05G1713	0.05	0.37	0.13	0.09	0.47	0.35	8.36	5.77	41	19.32
Cluster-Chr05-1	GH_A05G1714	6.85	7.3	5.54	4.41	9.19	5.09	12.35	5.4	3.56	2.53
Cluster-Chr05-1	GH_A05G1715	0.2	0	0.09	0.37	0.25	0.61	0.41	0.96	0.73	1.57
Cluster-Chr05-1	GH_A05G1716	0.28	0.58	0.19	0.17	0.01	0.06	0.16	0.43	2.01	0.58
Cluster-Chr05-1	GH_A05G1717	31.37	24.83	20.94	26.83	9.6	13.05	4.3	5.85	4.95	12.6
Cluster-Chr05-1	GH_A05G1718	10.7	11.68	7.93	3.77	7.13	5.43	7.6	2.18	2.18	0.65
Cluster-Chr05-1	GH_A05G1719	21.63	21.74	10.79	13.76	7.08	9.24	5.15	4.07	3.62	3.07
Cluster-Chr05-1	GH_A05G1720	9.81	5.71	9.37	6.53	6.9	4.6	3.46	0.73	1.85	0.38
Cluster-Chr05-1	GH_A05G1723	0.65	13.78	1.38	27.19	1.32	23.77	0.34	5.68	0.56	4.57
Cluster-Chr05-1	GH_A05G1724	4.56	6.1	1.85	2.96	0.28	0.35	0	0	0.38	0.04
Cluster-Chr05-1	GH_A05G1725	2.2	1.68	0.04	0.24	0.29	0.13	0.03	0	0.17	0.03
Cluster-Chr05-1	GH_A05G1732	5.95	4.03	10.15	18.13	33.32	38.23	42.44	49.97	20.89	16.83
Cluster-Chr05-1	GH_A05G1733	8.8	8.64	8.25	9.01	8.98	12.15	4.09	5.88	3.52	4.46
Cluster-Chr05-1	GH_A05G1734	29.46	36.15	26.76	27.7	15.11	20.55	14.75	15.2	10.1	8.71
Cluster-Chr05-1	GH_A05G1735	17.23	17.27	12.8	13.95	6.77	12.62	6.73	8.84	5.27	4.61
Cluster-Chr05-1	GH_A05G1736	0	0.05	0.1	25.29	0.06	28.96	0.14	3.99	0.2	0.96
Cluster-Chr05-1	GH_A05G1737	35.44	30.23	55.28	51.88	77.44	76.69	58	47.93	48.64	44.17
Cluster-Chr05-1	GH_A05G1738	10.81	7.7	2.87	2.42	0.35	0.72	0	0.49	0.34	0.1
Cluster-Chr05-1	GH_A05G1739	21.64	25.25	49.1	64.08	48.98	74.9	51.05	54.28	33.86	45.31
Cluster-Chr05-1	GH_A05G1740	11.73	6.57	5.63	2.69	3.47	2.39	10.39	10.84	13.33	3.02
Cluster-Chr05-1	GH_A05G1741	14.31	14.76	2.45	9.2	0.69	8.96	1.6	2.77	1.77	0.98
Cluster-Chr05-1	GH_A05G1742	11.98	7.88	16.33	11.59	10.77	11.41	13.14	7.27	9.69	10.25
Cluster-Chr05-1	GH_A05G1743	5.16	4.57	3.06	3.17	2.52	2.67	2.85	1.86	4.04	2.46
Cluster-Chr05-1	GH_A05G1744	7.08	6.21	27.17	37.32	0.6	0.44	2.34	0.45	17.43	0.96
Cluster-Chr05-1	GH_A05G1745	0.57	1.15	0.04	0	0	0	0	0	0	0.28
Cluster-Chr05-1	GH_A05G1746	17.22	16.9	46.92	34.26	46.9	68.64	69.35	100.38	31.48	39.32
Cluster-Chr05-1	GH_A05G1748	21.85	27.18	28.17	23.18	23.27	12.82	11.75	4.07	8.13	4.37
Cluster-Chr05-1	GH_A05G1749	28.55	29.89	66.67	122.32	70.67	82.53	74.58	95.46	68.98	96.2
Cluster-Chr05-1	GH_A05G1750	19.12	25.96	35.84	44.09	32.66	45.16	30.21	25.64	23.52	22.26
Cluster-Chr05-1	GH_A05G1751	17.44	21.24	4.24	5.31	4.63	2.49	4.91	1.68	4.8	2.68
Cluster-Chr05-1	GH_A05G1752	10.47	12.42	10.51	9.01	9.48	8.34	7.24	5.03	5.88	3.66
Cluster-Chr05-1	GH_A05G1753	18.04	19.99	28.38	20.31	25.95	23.89	19.76	13.64	13.23	8.5
Cluster-Chr05-1	GH_A05G1754	9.14	15.89	3.59	5.29	3.26	8.37	1.31	3.9	1.1	4.63
Cluster-Chr05-1	GH_A05G1755	7.56	9.2	4.41	11.24	4.94	6.4	1.54	2.97	2.93	4.59
Cluster-Chr05-1	GH_A05G1757	12.47	13.14	7.47	7.67	10.99	14.32	11.76	11.48	29.1	25.45
Cluster-Chr05-1	GH_A05G1758	3.29	3.44	9.41	8.8	11.72	12.73	21.28	29.3	26.85	20.64
Cluster-Chr05-1	GH_A05G1759	21.35	31.02	4.21	7.4	1.97	2.9	2.71	4.02	4.7	3.93
Cluster-Chr05-1	GH_A05G1760	9.49	10.79	4.65	6.15	2.18	3.52	1.41	1.18	1.59	1.13
Cluster-Chr05-1	GH_A05G1761	1.77	1.88	0.52	0.56	0.03	0.07	0.04	0.2	0.27	0.12
Cluster-Chr05-1	GH_A05G1762	0.24	0.23	0.11	0.07	0.05	0.07	0.28	0.06	6.59	1.9
Cluster-Chr05-1	GH_A05G1764	0.04	0.05	46.43	23.71	53.34	24.39	27.62	9.5	4.55	8.75
Cluster-Chr05-1	GH_A05G1768	14.62	10.81	1.58	0.6	0.06	0.04	0.12	0.07	1.05	0
Cluster-Chr05-1	GH_A05G1769	0.07	0.06	1.33	0.85	0.06	0.1	0.2	0.09	0.39	0.15
Cluster-Chr05-1	GH_A05G1770	26.47	26.8	50.85	35.8	31.38	29.41	10.37	8.56	8.74	7.44
Cluster-Chr05-1	GH_A05G1776	8.59	10.5	39.56	40.93	45.8	36.34	54.49	38.34	54.8	48.12
Cluster-Chr05-1	GH_A05G1777	12.31	13.56	3.46	5.45	4.32	2.48	3.02	0.68	5.33	6.95
Cluster-Chr05-1	GH_A05G1779	39.79	40.23	9.69	9.93	8.59	9.09	6.42	4.37	8.7	8.25
Cluster-Chr05-1	GH_A05G1780	5.09	6.28	4.7	3.81	2.92	2.48	1.23	1.41	0.78	0.55
Cluster-Chr05-1	GH_A05G1781	39.04	47.26	16.71	15.3	9.81	10.06	7.88	5.34	10.11	5.74
Cluster-Chr05-1	GH_A05G1782	24.57	21.87	12.18	14.24	13.81	20.09	13.6	15.52	12.17	14.42
Cluster-Chr05-1	GH_A05G1783	11.78	11.13	7.66	5.84	2.83	2.03	1.8	2.15	2.71	2.39
Cluster-Chr05-1	GH_A05G1784	5.13	3.16	26.58	34.49	8.09	3.19	0.14	0.19	0.27	0.05
Cluster-Chr05-1	GH_A05G1785	7.17	7.32	4.2	3.84	2.8	2	1.55	1.35	1.63	1.36
Cluster-Chr05-1	GH_A05G1786	11.78	14.33	5.68	8.17	3.24	6.37	4.05	4.09	4.68	5.39
Cluster-Chr05-1	GH_A05G1787	21.82	21.29	10	5.98	1.84	2.56	0.74	0.57	0.8	0.72
Cluster-Chr05-1	GH_A05G1789	13.13	12.08	10.09	13.58	5.45	7.3	4.04	3.37	6.2	2.34
Cluster-Chr05-1	GH_A05G1790	4.42	6.05	3.19	3.53	2.69	3.21	2.52	1.99	2.67	1.86
Cluster-Chr05-1	GH_A05G1791	5.32	5.38	0.67	1.02	0.18	0.29	0.15	0.32	0.13	0.07
Cluster-Chr05-1	GH_A05G1793	8.4	10.53	3.62	3.8	3.98	3.66	1.42	1.36	1.17	0.69
Cluster-Chr05-1	GH_A05G1794	13.72	16.62	13.19	9.74	13.1	10.44	4.35	3.97	4.03	2.31
Cluster-Chr05-1	GH_A05G1795	14.88	15.46	7.6	4.88	3.65	3.59	2.64	3.39	4.63	2.44
Cluster-Chr05-1	GH_A05G1796	3.64	3.05	1.64	1.93	1.07	1.55	0.27	0.14	0.33	0.09
Cluster-Chr05-1	GH_A05G1797	2.51	2.57	1.15	0.74	0.6	1.12	0.88	0.94	3.66	1.11
Cluster-Chr05-1	GH_A05G1798	42.63	39.67	32.17	20.31	17.22	16.84	14.15	9.31	37.38	19.68
Cluster-Chr05-1	GH_A05G1800	20.41	23.36	2.41	4.59	0.18	0.49	6.14	5.94	4.39	2.69
Cluster-Chr05-1	GH_A05G1802	2.19	2.94	0.89	0.95	0.89	0.91	0.7	0.68	0.34	0.63
Cluster-Chr05-1	GH_A05G1803	30.63	27.79	14.57	17.67	10.39	11.64	7.15	8.8	14.14	8.99
Cluster-Chr05-1	GH_A05G1804	6.35	3.79	8.15	9.22	9.13	7.65	14.1	16.64	10.81	5.67
Cluster-Chr05-1	GH_A05G1805	0.29	0.64	17.05	46.35	9.05	12.89	2.26	1.78	1.23	0.37
Cluster-Chr05-1	GH_A05G1806	7.86	11.33	5.47	5.46	7.34	5.59	7.78	2.93	4.73	3.35
Cluster-Chr05-1	GH_A05G1807	13.47	15.12	10.71	15.16	13.59	17.9	19.45	49.36	16.98	35.23
Cluster-Chr05-1	GH_A05G1808	6.85	6.51	3.39	3.88	1.37	2.76	1.5	2.23	1.41	0.9
Cluster-Chr05-1	GH_A05G1809	8.46	9.12	5.08	5.53	3.32	3.22	3.48	3.06	2.66	2.3
Cluster-Chr05-1	GH_A05G1811	1.86	3.4	4.22	3.32	9.14	5.38	6.77	7.31	7.89	8.91
Cluster-Chr05-1	GH_A05G1813	25.17	20.82	18.15	22.67	22.75	25.85	340.97	211.71	922.86	968.37
Cluster-Chr05-1	GH_A05G1815	3	4.35	3.82	4.07	4.22	5.49	3.52	5.19	2.93	2.44
Cluster-Chr05-1	GH_A05G1816	7.25	8.23	7.32	8.39	5.91	8.69	3.36	3.21	4.18	2.91
Cluster-Chr05-1	GH_A05G1817	1.3	1.67	7.49	27.31	64.58	87.12	31.13	47.69	6.09	27.1
Cluster-Chr05-1	GH_A05G1818	39.96	45.16	61.7	70.85	40.38	55.62	36.41	36.1	21.2	19.52
Cluster-Chr05-1	GH_A05G1819	8.19	8.72	4.33	4.45	2.09	3.33	1.96	1.78	2.33	1.55
Cluster-Chr05-1	GH_A05G1820	13.09	16.44	3.32	3.04	0.42	0.85	0.31	0.58	0.31	0.06
Cluster-Chr05-1	GH_A05G1823	0.24	0.1	0.42	0.09	0.12	0.08	0.21	0.14	1.14	0.17
Cluster-Chr05-1	GH_A05G1824	3.23	2.79	0.46	0.6	0.17	0.11	0.07	0.07	0.32	0.13
Cluster-Chr05-1	GH_A05G1825	0.51	0.73	0.42	1.41	0.1	0.06	0.06	0.02	0.15	0.04
Cluster-Chr05-1	GH_A05G1826	29.67	32.68	11.34	22.31	4.25	4.71	1.13	0.75	1.73	0.83
Cluster-Chr05-1	GH_A05G1828	0.22	0.07	0.42	0.42	0.31	0.64	2.09	0.62	10.65	10.16
Cluster-Chr05-1	GH_A05G1829	7.36	7.41	4.94	5.86	4.04	4.8	3.71	2.21	2.56	1.85
Cluster-Chr05-1	GH_A05G1830	11.06	13.13	9.01	6.64	6.45	6.62	7.75	6.05	7.88	4.99
Cluster-Chr05-1	GH_A05G1831	4.31	5.83	1.45	1.33	1.06	0.81	1.06	0.8	1.38	0.86
Cluster-Chr05-1	GH_A05G1834	12.51	10.78	6.19	5.29	0.86	1.48	7.76	2.39	16.14	7.97
Cluster-Chr05-1	GH_A05G1835	4.27	6.99	2.37	8.63	4.1	4.45	19.27	35.57	56.82	67.78
Cluster-Chr05-1	GH_A05G1836	1.72	3.06	1.22	1.87	1.5	0.83	2.81	0.59	2.24	2.14
Cluster-Chr05-1	GH_A05G1837	16.72	16.5	3.7	2.87	0.1	0.07	0.05	0.16	0.19	0.34
Cluster-Chr05-1	GH_A05G1838	0.02	0	0	0.02	0.02	0.02	6.69	1.15	11.02	1.88
Cluster-Chr05-1	GH_A05G1840	7.67	4.35	1.03	0.36	0.71	0.17	1.72	0.34	1.99	0.8
Cluster-Chr05-1	GH_A05G1842	0.22	0.4	0.25	0.43	2.31	1.61	0.79	0.66	0.22	0.34
Cluster-Chr05-1	GH_A05G1843	0.46	0.9	0.59	0.87	4.12	1.46	1.07	4.76	0.1	1.08
Cluster-Chr05-1	GH_A05G1844	31.27	27.94	64.47	47.37	98.48	78.24	113.27	102.15	85.44	68.19
Cluster-Chr05-1	GH_A05G1845	6.39	9.64	4.11	7.61	2.85	6.35	2.88	1.83	1.75	1.1
Cluster-Chr05-1	GH_A05G1846	11	15.76	6.97	6.07	5.42	4.63	3.78	2.68	4.1	1.82
Cluster-Chr05-1	GH_A05G1847	10.7	13.58	9.72	11.8	8.81	12.66	9.17	11.61	6.83	5.76
Cluster-Chr05-1	GH_A05G1848	33.5	24.11	13.42	13.83	10.88	23.4	15.94	16.35	16.71	18.37
Cluster-Chr05-1	GH_A05G1849	9.59	15.44	1.25	1.8	0.24	0.4	0.19	0.37	0.88	0.73
Cluster-Chr05-1	GH_A05G1850	0.02	2.46	0	2.39	0.02	3.87	0.02	2.77	0.04	1
Cluster-Chr08-1	GH_A08G0492	9.3	12.18	9.75	10.31	12.96	11.78	11.22	10.99	12.68	10.57
Cluster-Chr08-1	GH_A08G0493	25.01	15.67	26.97	19.63	24.4	20.38	37.16	18.71	23.36	19.02
Cluster-Chr08-1	GH_A08G0495	15.29	21.7	6.52	7.51	4.78	5.37	5.7	6.78	5.71	8.09
Cluster-Chr08-1	GH_A08G0496	11.44	10.23	8.21	6.61	4.5	4.38	4.26	2.73	2.9	0.95
Cluster-Chr08-1	GH_A08G0498	0.2	0.38	0.13	0.03	1.37	3.35	0.33	0.43	0.12	0.12
Cluster-Chr08-1	GH_A08G0499	1.9	3.05	2.56	0.89	0.4	0.38	3.46	1.12	3.62	0.52
Cluster-Chr08-1	GH_A08G0500	0.09	10.21	0.09	1.48	0.02	0.16	0	0	0	0.1
Cluster-Chr08-1	GH_A08G0502	3.96	3.86	1.47	0.88	1.03	0.3	0.66	0.24	0.66	0.18
Cluster-Chr08-1	GH_A08G0503	1.61	3.06	4.94	2.94	2.68	3.48	8.52	13.49	7.9	16.23
Cluster-Chr08-1	GH_A08G0504	4.18	5.8	2.09	1.97	1.18	1.05	1.09	0.62	1.56	0.78
Cluster-Chr08-1	GH_A08G0507	2.48	3.07	3.75	2.61	2.35	2.59	2.3	2.6	2.05	1.49
Cluster-Chr08-1	GH_A08G0509	26.58	23.77	81.08	64.81	93.35	81.94	74.96	67.52	50.28	58.68
Cluster-Chr08-1	GH_A08G0510	3.24	5.23	16.27	34.63	30.31	47.51	9.54	13.43	5.83	10.26
Cluster-Chr08-1	GH_A08G0513	0	0.03	11.04	8.35	0	0	1.62	3.08	0.28	0.26
Cluster-Chr08-1	GH_A08G0514	3.65	5.12	3.79	3.18	5.12	2.7	5.44	2.82	3.84	2.05
Cluster-Chr08-1	GH_A08G0515	3.97	3.35	3.45	6.46	10.07	10.6	490.48	1059.51	1708.5	1135.22
Cluster-Chr08-1	GH_A08G0516	2.52	2.37	10.3	8.47	12.02	12.68	13.49	13.52	16.94	3.09
Cluster-Chr08-1	GH_A08G0517	36.5	33.11	9.1	6.95	2.19	1.82	1.36	1.02	5.78	1.78
Cluster-Chr08-1	GH_A08G0518	6.42	7.33	7.46	6.4	3.94	4.27	3.31	2.48	1.94	3.19
Cluster-Chr08-1	GH_A08G0519	5.59	5.93	1.82	1.3	1.67	1.54	0.77	0.31	1.1	0.22
Cluster-Chr08-1	GH_A08G0520	18.63	19.67	5.88	5.3	3.86	2.75	8.26	4.12	11.84	20.53
Cluster-Chr08-1	GH_A08G0521	0.41	0.16	1.64	0.09	0.39	0	0	0	0	0
Cluster-Chr08-1	GH_A08G0523	8.5	8.71	8.12	6	4.94	5.55	4.25	3.03	4.88	2.79
Cluster-Chr08-1	GH_A08G0524	4.62	4.3	2.37	3	3.24	1.69	2.65	3.24	1.45	2.54
Cluster-Chr08-1	GH_A08G0525	0.53	1.25	0.1	0.41	0.26	0.61	0.15	0.25	0.14	0.04
Cluster-Chr08-1	GH_A08G0526	38.91	49.42	43.58	32.5	59.71	56.21	89.24	62.21	67.19	79.31
Cluster-Chr08-1	GH_A08G0527	50.3	47.67	46.4	41.59	67.85	78.02	74.09	54.01	35.32	40.71
Cluster-Chr08-1	GH_A08G0528	2.21	1.51	1.23	0.7	1.56	0.72	1.48	0.66	0.57	0.39
Cluster-Chr08-1	GH_A08G0529	17.87	14.46	10.95	6.87	36.08	22.45	38.18	26.58	43.93	75.98
Cluster-Chr08-1	GH_A08G0530	17.31	18.3	9.57	10.84	7.43	7.47	7.67	6.33	6.48	8.63
Cluster-Chr08-1	GH_A08G0531	5.68	23.55	1.63	8.34	0.23	5.57	0.03	0.84	0.36	1.7
Cluster-Chr08-1	GH_A08G0532	40.01	37.03	39.58	44.46	25.86	25.91	19.84	14.95	14.43	8.97
Cluster-Chr08-1	GH_A08G0533	2.63	1.29	0.93	1.23	2.15	1.86	1.62	1.61	1.12	1.31
Cluster-Chr08-1	GH_A08G0534	18.98	15.69	2.14	1.88	0.5	0.17	0.57	0.05	1.88	0.63
Cluster-Chr08-1	GH_A08G0542	7.73	6.68	7.82	6.91	5.76	6.27	5.14	4.29	5.32	3.04
Cluster-Chr08-1	GH_A08G0543	5.87	7.7	3.47	3.46	2.58	4.57	1.71	3.44	2.69	3.81
Cluster-Chr08-1	GH_A08G0544	39.96	59.04	53.65	59.68	45.82	72.86	48.17	46.13	27.07	41.58
Cluster-Chr08-1	GH_A08G0545	9.18	10.36	3.19	4.15	4.24	3.43	4.86	3.89	3.85	4.18
Cluster-Chr08-1	GH_A08G0546	6.38	6.93	5.42	5.55	3.28	4.33	3.07	3.28	2.79	2.02
Cluster-Chr08-1	GH_A08G0549	5.38	5.54	1.43	1.08	0.45	0.32	0.2	0.18	0.1	0.14
Cluster-Chr08-1	GH_A08G0550	14.24	24.71	7.68	9.38	7.66	9.42	5.3	3.4	5.02	4.72
Cluster-Chr08-1	GH_A08G0551	13.68	14.99	10.82	11.95	5.94	7.58	4.28	5	4.09	3.51
Cluster-Chr08-1	GH_A08G0552	0.84	1.09	2.97	1.28	1.5	1.21	2.63	1.19	1.61	0.55
Cluster-Chr08-1	GH_A08G0553	10.88	12.69	23.33	24.78	16.01	17.6	13.07	15.61	12.69	10.36
Cluster-Chr08-1	GH_A08G0558	12.51	0.1	9.07	31.06	60.82	62.1	3222.3	5098.6	12259.7	14594.7
Cluster-Chr08-1	GH_A08G0560	8.44	0.94	9.88	0.4	13.16	0.47	10.4	0.42	9.69	0.48
Cluster-Chr08-1	GH_A08G0563	42	15.59	12.13	13.26	16.27	10.45	17.26	15.03	9.41	2.09
Cluster-Chr08-1	GH_A08G0565	11.02	17.12	9.44	12.83	5.82	9.98	5.97	8.92	8.38	6.97
Cluster-Chr08-1	GH_A08G0566	5.69	4.33	2.13	2.21	1.6	1.59	1.68	0.66	1.21	0.84
Cluster-Chr08-1	GH_A08G0567	7.27	7.71	2.54	3.82	1.62	3.54	2.11	1.64	1.66	0.92
Cluster-Chr08-1	GH_A08G0569	82.29	79.63	52.6	51.73	31.27	37.89	29.79	23.59	22.69	18.31
Cluster-Chr08-1	GH_A08G0572	5.06	4.48	1.86	3.48	0.62	0.65	1.22	3.21	4.43	5.93
Cluster-Chr08-1	GH_A08G0573	25.78	36.97	6.97	8.24	3.2	6.81	4.85	8.67	8.25	18.28
Cluster-Chr08-1	GH_A08G0574	28.78	22.81	30.7	21.19	42.27	20.82	43.28	20.8	34.39	15.58
Cluster-Chr08-1	GH_A08G0576	0	1.69	0	0.37	0	0.19	0	0.14	0	0.09
Cluster-Chr08-1	GH_A08G0577	4.73	4.58	3.43	4.42	3.21	4.16	5.14	3.89	3.85	3.14
Cluster-Chr08-1	GH_A08G0578	0.66	0.28	1.03	2.36	4.74	5.14	290.77	481.48	1376.81	700.81
Cluster-Chr08-1	GH_A08G0579	5.88	6.49	2.34	2.16	1.36	1.45	2.98	4.64	4.3	1.97
Cluster-Chr08-1	GH_A08G0581	37.9	23.3	98.75	122.3	57.92	80.13	81.54	76.07	85.38	83.52
Cluster-Chr08-1	GH_A08G0583	0	0.06	1.4	0.33	0.47	0.2	0.25	0.13	0.57	0.45
Cluster-Chr08-1	GH_A08G0585	20.07	32.85	2.87	9.83	0.61	3	0.06	0.14	0.21	0.09
Cluster-Chr08-1	GH_A08G0586	0.02	0	0.04	0.02	0.02	0.02	0	0.04	0.28	1.93
Cluster-Chr08-1	GH_A08G0588	30.31	19.15	22.62	19.81	15.11	13.84	16.82	8.17	18.56	11.47
Cluster-Chr08-1	GH_A08G0589	12.33	6.44	7.97	2.76	8.21	3.69	6.13	2.46	4.66	1.63
Cluster-Chr08-1	GH_A08G0590	35.05	29.59	13.79	10.52	7.43	5.09	6.8	4.68	7.36	4.43
Cluster-Chr08-1	GH_A08G0593	2.03	2.2	1.26	1.55	0.96	1.45	3.48	3.65	3.01	2.96
Cluster-Chr08-1	GH_A08G0594	10.65	10.94	29.77	28.69	30.86	33.56	43.94	58.83	42.67	44.12
Cluster-Chr08-1	GH_A08G0595	0.08	0.09	0.22	0.21	3.99	6.06	64.96	12.58	66.54	7.35
Cluster-Chr08-1	GH_A08G0596	27.03	29.34	26.56	22.32	15.68	22.83	16.21	15.18	10.13	11.66
Cluster-Chr08-1	GH_A08G0597	4.49	3.63	2.38	0.77	1.72	0.54	1.07	0.29	1.81	0.61
Cluster-Chr08-1	GH_A08G0599	72.09	63.46	118.3	105.36	56.48	76.07	66.26	78.06	61.29	62.51
Cluster-Chr08-1	GH_A08G0602	4.55	15.68	1.4	2.82	0.91	1.14	0.52	0.61	1.26	0.87
Cluster-Chr08-1	GH_A08G0603	9.62	12.06	5.32	6.03	4.19	4.98	4.53	6.07	6.04	5.36
Cluster-Chr08-1	GH_A08G0604	1.78	4.62	0.53	1.97	0.1	0.59	0.4	2.3	1.6	0.65
Cluster-Chr08-1	GH_A08G0605	20.29	17.59	19.73	16.34	13.69	15.71	6.8	3.01	7.46	5.32
Cluster-Chr08-1	GH_A08G0608	14.26	21.03	5.36	8.86	4.43	6.98	4.73	7.88	3.42	8.93
Cluster-Chr08-1	GH_A08G0609	5.46	4.82	1.29	1.03	1.36	0.64	0.9	0.84	1.21	0.32
Cluster-Chr08-1	GH_A08G0610	81.02	83.74	76.37	96.78	66.26	85.12	62.26	37.3	25.77	30.07
Cluster-Chr08-1	GH_A08G0611	2.88	2.97	1.85	1.35	1.32	1.3	1.15	1.21	0.78	0.52
Cluster-Chr08-1	GH_A08G0614	0.42	0.67	0.58	0.41	0.11	0.13	0.11	0.23	0.3	2.2
Cluster-Chr08-1	GH_A08G0615	22.21	30.54	23.64	21.51	21.59	21.88	18.03	22.56	11.63	12.01
Cluster-Chr08-1	GH_A08G0617	3.22	2.44	3.74	2.29	4.71	3.5	5.49	4.82	7.72	6.49
Cluster-Chr08-1	GH_A08G0618	5.41	4.31	4.86	4.17	4.94	5.09	2.81	3.1	3.19	1.81
Cluster-Chr08-1	GH_A08G0619	13.96	10.17	42.84	35.53	53.67	45.51	63.48	40.17	44.19	33.95
Cluster-Chr08-1	GH_A08G0620	16.47	14.74	24.57	31.28	21.99	36.62	28.47	33.41	22.07	36.29
Cluster-Chr08-1	GH_A08G0623	8.25	7.5	3.55	5.4	2.43	3.95	5.5	10.46	4.99	10.21
Cluster-Chr08-1	GH_A08G0624	71.62	49.64	84.52	57.29	95.59	60.9	107.06	36.93	71.78	51.92
Cluster-Chr08-1	GH_A08G0625	13.12	21.48	20.7	29.45	20.63	36.1	16.92	25.57	11.62	18.12
Cluster-Chr08-1	GH_A08G0626	9.88	25.49	14.03	12.15	8.19	15.09	4.04	5.19	3.6	8.62
Cluster-Chr08-1	GH_A08G0629	1.56	0.57	0.34	0.03	0.03	0	0	0	0	0
Cluster-Chr08-1	GH_A08G0634	18.56	26.14	4.36	6.96	2.52	5.7	2.59	12.45	4.36	14.37
Cluster-Chr08-1	GH_A08G0637	0.16	0.24	0.56	0.33	1.18	0.71	0.4	0.15	0.04	0.08
Cluster-Chr08-1	GH_A08G0638	7.75	8.63	5.58	6.45	2.93	4.53	3.07	2.52	2.29	1.75
Cluster-Chr08-1	GH_A08G0640	4.43	4.82	3.35	2.46	2.55	2.54	2.78	2.06	2.47	3.79
Cluster-Chr08-1	GH_A08G0641	18.4	17.5	23.64	23.21	37.45	38.41	27.15	79.52	31.59	132.27
Cluster-Chr08-1	GH_A08G0642	43.91	39.35	14.44	11.74	9.83	9.16	11.58	8.31	9.29	7.42
Cluster-Chr08-1	GH_A08G0643	5.74	0.59	43.01	56.45	66	177.07	35.55	95.36	23.05	37.04
Cluster-Chr08-1	GH_A08G0644	21.78	20.45	24.01	18.85	29.01	27.7	53.93	42.95	40.7	49.93
Cluster-Chr08-1	GH_A08G0647	3.33	3.59	1.02	0.97	0.94	0.45	0.7	0.36	1.7	0.71
Cluster-Chr08-1	GH_A08G0648	13.27	14.94	20.49	23.64	26.08	18.3	8.77	4.98	2.28	2.3
Cluster-Chr08-1	GH_A08G0653	0	0	0	0.19	0	0.62	0.42	3.18	0	0.15
Cluster-Chr08-1	GH_A08G0654	3.42	3.13	2.89	4.6	2.39	13.66	7.69	16.28	7.47	6.03
Cluster-Chr08-1	GH_A08G0655	1.45	2.14	0.52	0.48	0.35	0.29	0.17	0.16	0.39	0.11
Cluster-Chr08-1	GH_A08G0656	4.29	5.47	4.35	3.3	2.09	2.65	2.52	1.69	2.03	1.4
Cluster-Chr08-1	GH_A08G0657	4.99	6.09	1.94	2	0.46	0.87	0.28	0.22	0.65	0.47
Cluster-Chr08-1	GH_A08G0658	7.04	5.7	2.37	2.84	2.78	2.58	2.24	1.92	2.29	2.15
Cluster-Chr08-1	GH_A08G0659	9.84	10.82	5.96	4.92	2.36	2.56	1.56	0.64	2.91	0.86
Cluster-Chr08-1	GH_A08G0660	9.1	8.24	10.2	10.13	8.21	6.92	7.78	6.23	7.37	6.05
Cluster-Chr08-1	GH_A08G0661	7.63	8.77	4.19	5.17	2.43	2.44	2.2	2.14	2.49	1.65
Cluster-Chr08-1	GH_A08G0665	2.73	0.46	0.14	0.07	0.02	0	0	0	0	0
Cluster-Chr08-1	GH_A08G0666	9.31	9.37	3.14	2.39	1.54	1.19	1.41	0.66	1.28	0.72
Cluster-Chr08-1	GH_A08G0667	10.64	12.46	10.35	12.59	11.29	7.43	13.13	8.97	17.34	14.92
Cluster-Chr08-1	GH_A08G0668	1.42	3.01	1.01	1.47	1.09	2.11	0.49	0.26	0.2	0.24
Cluster-Chr08-1	GH_A08G0671	0.68	0.31	0.65	9.06	0.34	10.7	0.17	1.2	0	0.21
Cluster-Chr08-1	GH_A08G0673	4.52	4.91	3.72	2.94	2.99	2.56	2.78	3.76	3.59	5.04
Cluster-Chr08-1	GH_A08G0675	22	28.6	8.29	8.49	4.09	3.24	3.93	4.22	7.16	3.48
Cluster-Chr08-1	GH_A08G0676	6.73	9.6	19.35	22.32	36.97	26.4	35.94	34.67	24.38	12.84
Cluster-Chr08-1	GH_A08G0677	0.16	0.17	14.86	9.87	8.81	5.84	9.65	1.37	5.51	1.14
Cluster-Chr08-1	GH_A08G0678	222.3	154.51	52.49	60.06	26.75	34.44	24.9	30.13	33.36	28.85
Cluster-Chr08-1	GH_A08G0681	1.38	0.22	0.39	0.09	2.45	0.19	2.08	0.11	0.39	0.02
Cluster-Chr08-1	GH_A08G0682	1.47	0.07	0.23	0.09	0.2	0.04	0.18	0.02	0.32	0.2
Cluster-Chr08-1	GH_A08G0685	2.27	0.88	0.93	0.35	0.05	0.06	0.02	0.15	0.05	0.04
Cluster-Chr08-1	GH_A08G0687	0.06	0.04	5.16	4.76	5.58	10.42	2.52	16.68	0.17	0.4
Cluster-Chr08-1	GH_A08G0688	7.54	10.04	3.22	3.43	1.91	2.6	3.05	2.48	2.43	1.54
Cluster-Chr08-1	GH_A08G0689	47.89	53.96	29.26	22.85	18.78	18.59	23.94	18.4	22.55	17.97
Cluster-Chr08-1	GH_A08G0690	11.16	9.28	11.08	8.07	8.38	6.94	9.31	5.97	7.21	4.66
Cluster-Chr08-1	GH_A08G0691	8.27	19.6	7.12	7.44	7	4.84	5.26	2.09	4.51	2.63
Cluster-Chr08-1	GH_A08G0692	8.28	14.73	2.48	2.89	43.26	25.02	23.83	10.72	3.27	1.29
Cluster-Chr08-1	GH_A08G0693	1.81	2.9	1.15	0.96	0.37	0.34	0.67	1.17	1.16	1.91
Cluster-Chr08-1	GH_A08G0694	1.03	1.26	0.47	0.89	0.38	0.39	0.79	0.68	0.67	0.15
Cluster-Chr08-1	GH_A08G0699	16.89	25.41	5.54	11.22	1.76	8	2.3	4.37	4.85	5.49
Cluster-Chr08-1	GH_A08G0701	4.08	4.96	2.01	3.59	0.77	2.33	0.56	1.42	1.52	1.16
Cluster-Chr08-1	GH_A08G0702	2.2	3.87	1.2	1.1	0.42	0.52	0.29	0.31	0.36	0.26
Cluster-Chr08-1	GH_A08G0703	6.3	7.7	4.23	3	2.62	2.87	2	2.72	1.84	3.26
Cluster-Chr08-1	GH_A08G0704	7.34	0.56	1.29	0.09	1.06	0.21	0.91	0.13	1.87	1.4
Cluster-Chr08-1	GH_A08G0705	3.7	2.06	0.98	0.38	0.01	0	0.02	0.02	0.29	0.04
Cluster-Chr08-1	GH_A08G0706	1.69	3.47	2.46	0.15	1.34	0.46	0.4	0.08	0.29	0.21
Cluster-Chr08-1	GH_A08G0708	29.31	32.65	22.53	18.93	16.86	17.61	15.87	15.8	18.74	15.33
Cluster-Chr08-1	GH_A08G0709	8.21	19.94	2.6	5.46	1.44	2.24	1.21	1.24	1.33	1.36
Cluster-Chr08-1	GH_A08G0711	1.55	2.43	0.44	0.43	0.12	0.15	0.03	0.05	0.05	0
Cluster-Chr08-1	GH_A08G0714	1.18	1.76	0.31	0.19	0	0.03	0	0	0	0.02
Cluster-Chr08-1	GH_A08G0715	17.64	11.38	1.89	2.05	0.29	0.1	4.17	3.9	14.43	9
Cluster-Chr08-1	GH_A08G0716	13.34	13.91	20.29	31.38	13.78	26.19	6.27	12.17	3.45	4.06
Cluster-Chr08-1	GH_A08G0717	10.41	11.2	14.25	13.62	8.32	11.92	8.4	8.85	10.66	11.41
Cluster-Chr08-1	GH_A08G0718	2.79	2.26	1.02	0.81	0.23	0.23	1.11	0.7	3.44	1.29
Cluster-Chr08-1	GH_A08G0719	17.44	18.66	27.68	23.89	20.88	24.35	21.22	24.77	22.32	12.81
Cluster-Chr08-1	GH_A08G0720	4.72	8.54	3.99	5.46	2.04	2.87	0.31	0.19	0.04	0.02
Cluster-Chr08-1	GH_A08G0721	5.28	6.35	2.76	4.3	2.19	3.34	1.94	2.21	2.65	1.58
Cluster-Chr08-1	GH_A08G0722	1.24	0.82	0.18	0.28	0.16	0.29	0.1	0	0.17	0.34
Cluster-Chr08-1	GH_A08G0723	43.54	35.45	23.18	22.16	29.26	21.21	20.58	22.41	22.74	15.58
Cluster-Chr08-1	GH_A08G0726	16.26	16.7	6.23	6.55	2.49	2.91	1.94	2.42	2.05	1.12
Cluster-Chr08-1	GH_A08G0727	4.87	6.29	2.38	2.32	1.79	2.06	0.71	0.37	0.96	0.13
Cluster-Chr08-1	GH_A08G0729	2.92	2.89	2.13	2.02	2.83	2.26	2.44	1.48	1.95	1.15
Cluster-Chr08-1	GH_A08G0730	9.57	0	13.18	0.23	9.19	0.3	12.17	0.08	11.3	0.09
Cluster-Chr08-1	GH_A08G0735	5.72	4.3	13.94	2.58	8.5	1.4	23.06	15.15	54.27	19.82
Cluster-Chr08-1	GH_A08G0736	67.82	50.79	15.7	14.32	8.25	8.29	13.96	7.65	17.1	8.2
Cluster-Chr08-1	GH_A08G0737	1.36	1.01	1.94	1.13	0.81	0.61	0.46	0.17	0.85	0.52
Cluster-Chr08-1	GH_A08G0738	19.01	22.83	2.31	3.13	0.19	0.28	0.05	0.25	0.05	0.12
Cluster-Chr08-1	GH_A08G0739	5.6	7.6	2	2.14	0.45	0.3	0.15	0.14	0.54	0.41
Cluster-Chr08-1	GH_A08G0740	32.37	38.55	6.99	4.76	0.46	0.57	0.03	0.1	0.05	0.16
Cluster-Chr08-1	GH_A08G0742	10.25	9.41	4.8	5.45	2.51	3.82	5.42	9.35	5.32	3.91
Cluster-Chr08-1	GH_A08G0743	3.17	3.52	0.9	1.33	0.51	0.77	0.25	0.26	0.37	0.26
Cluster-Chr08-1	GH_A08G0746	6.23	4.4	0.53	0.81	0.35	0.39	0.21	0.47	0.03	0.15
Cluster-Chr08-1	GH_A08G0749	1.82	0.21	1.16	0.41	0.63	0	2.24	0.55	1.74	0.11
Cluster-Chr08-1	GH_A08G0750	17.86	14.99	7.66	6.28	6.02	8.8	6.83	5.52	5.29	5.08
Cluster-Chr08-1	GH_A08G0754	13.23	10.82	4.51	1.88	0.56	0.7	1.51	0.57	2.25	1.53
Cluster-Chr08-1	GH_A08G0758	25.15	24.71	5.32	7.77	4.83	5.95	15.03	37.08	26.57	20.51
Cluster-Chr08-1	GH_A08G0759	36.31	36.49	14.36	24.42	24.03	31.18	29.59	15.1	15.44	11.63
Cluster-Chr08-1	GH_A08G0761	10.9	9.2	3.9	2.86	1.24	1.67	1.14	1.03	1.75	0.82
Cluster-Chr08-1	GH_A08G0762	20.66	27.75	2.12	3.24	1.77	5.02	3.67	6.64	10.44	49.5
Cluster-Chr08-1	GH_A08G0764	7.83	12.1	3.75	4.82	10.07	11.01	12.07	18.79	2.48	1.66
Cluster-Chr08-1	GH_A08G0765	0.09	8.21	0.18	16.75	0.1	15.53	0.16	14.14	0.14	6.62
Cluster-Chr08-1	GH_A08G0766	0.18	0.27	1.38	0.07	10.77	2.09	1.78	0.08	0.12	0
Cluster-Chr08-1	GH_A08G0768	7.59	10.25	4.19	5.76	2.26	3.77	1.94	1.95	1.91	1.98
Cluster-Chr08-1	GH_A08G0769	3.14	1.52	0.13	0.28	0.25	0.23	0	0.07	0.41	0.18
Cluster-Chr08-1	GH_A08G0771	7.77	15.05	5.99	5.3	9.28	4.33	4.8	2.28	17.49	5.68
Cluster-Chr08-1	GH_A08G0772	4.49	7.48	3.05	5.02	1.55	2.56	1.96	2.02	1.61	1.34
Cluster-Chr08-1	GH_A08G0773	105.94	67.5	6.4	11.07	0.34	0.72	0.23	0.11	0.06	0
Cluster-Chr08-1	GH_A08G0775	47.81	40.78	16.15	17.83	10.81	6.81	2.98	1.11	0.91	0.44
Cluster-Chr08-1	GH_A08G0777	6.72	0.08	0.28	0.01	0.01	0.01	0.02	0	0.07	0.01
Cluster-Chr08-1	GH_A08G0778	4.25	3.19	0.96	0.68	0.21	0.68	0.33	0.57	1.96	1.31
Cluster-Chr08-1	GH_A08G0779	4.27	2.62	1.35	1.34	1	0.81	0.54	0.5	0.72	0.6
Cluster-Chr08-1	GH_A08G0780	0.47	0.59	0.89	0.43	0.24	0.14	0.37	0.19	1.32	0.93
Cluster-Chr08-1	GH_A08G0781	0.53	0.47	0.4	0.18	0.14	0.16	5.21	0.94	3.62	0.3
Cluster-Chr08-1	GH_A08G0782	5.83	2.62	2.42	1.3	0.13	0.24	0.28	0.15	0.96	0.46
Cluster-Chr08-1	GH_A08G0783	32.25	53.54	5.7	8.14	5.05	4.8	10.94	6.61	3.31	2.76
Cluster-Chr08-1	GH_A08G0792	17.55	21.5	23.77	25.14	9.22	12.4	2.69	0.74	2.26	0.91
Cluster-Chr08-1	GH_A08G0793	0.17	0.21	0.96	1.67	0.07	1.43	0.79	2.91	1.42	70.87
Cluster-Chr08-1	GH_A08G0794	0.22	1.57	0.26	0.51	0.15	0.76	0.06	0.42	0.03	0.35
Cluster-Chr08-1	GH_A08G0797	1.67	1.83	0.19	0.54	0.22	0.16	0.56	0.56	0.9	0.24
Cluster-Chr08-1	GH_A08G0799	1.27	15.29	0.56	4.41	0.76	2.61	0.19	1.91	0.4	1.33
Cluster-Chr08-1	GH_A08G0802	0.16	0.28	9.82	46.64	12.45	38.46	0.93	1.19	0.94	0.19
Cluster-Chr08-1	GH_A08G0803	10.17	9.13	5.2	3.61	3	2.76	2.42	0.94	2.75	1.17
Cluster-Chr08-1	GH_A08G0804	9.36	12.63	6.64	6.78	3.08	3.72	2.51	1.89	2.5	1.37
Cluster-Chr08-1	GH_A08G0805	4.06	3.97	4.25	2.59	2.88	1.59	2.36	2.13	1.68	0.78
Cluster-Chr08-1	GH_A08G0806	8.32	9.51	5.01	3.95	4.1	2.46	4.4	3.19	4.92	2.78
Cluster-Chr08-1	GH_A08G0807	4.64	2.42	10.95	8.65	11.16	9.09	8.26	6.56	4.65	4.32
Cluster-Chr08-1	GH_A08G0808	3.38	4.31	3.25	3.33	3.35	2.88	3.78	3.15	4.08	2.62
Cluster-Chr08-1	GH_A08G0809	5.18	7.42	4.63	2.59	3.69	2.86	3.11	1.22	3.31	1.93
Cluster-Chr08-1	GH_A08G0810	3.91	5.92	2.16	5.45	1.47	5.12	1.72	3.39	1.96	2.75
Cluster-Chr08-1	GH_A08G0811	13.37	14.13	3.96	4.76	3.4	3.17	2.1	2.4	2.5	1.29
Cluster-Chr08-1	GH_A08G0812	10.88	12.94	13.46	15.48	13.25	19.47	10.85	13.85	7.06	6.66
Cluster-Chr08-1	GH_A08G0814	3.29	2.35	1.09	0.65	0.53	0.21	0.52	0.22	0.71	0.3
Cluster-Chr08-1	GH_A08G0815	1.15	0.64	0.76	0.6	0.33	0.26	0.16	0.2	0.3	0.09
Cluster-Chr08-1	GH_A08G0816	13.93	27.68	1.06	1.02	0.04	0.11	0.05	0.29	0.11	0.14
Cluster-Chr08-1	GH_A08G0817	7.11	6.39	11.89	6.59	10.04	7.19	8.12	7.68	7.94	6.67
Cluster-Chr08-1	GH_A08G0818	10.19	12.71	4.62	9.13	2.69	5.72	1.73	3.05	2.61	2.54
Cluster-Chr08-1	GH_A08G0820	29.41	37.38	12.55	15.91	10.89	13.31	8.63	8.4	7.73	6.24
Cluster-Chr08-1	GH_A08G0824	0.77	1.36	0.26	0.72	0.32	0.55	0.14	0.93	0.4	0.72
Cluster-Chr08-1	GH_A08G0825	17.38	12.79	6.25	5.43	3.55	3.14	3.13	2.58	2.35	2.54
Cluster-Chr08-1	GH_A08G0826	0.26	0.87	1.2	0.99	0.99	0.07	1.61	0.22	0.8	1.8
Cluster-Chr08-1	GH_A08G0827	9.84	7.05	6.01	8.44	3.27	7.23	3.24	1.69	1.84	1.5
Cluster-Chr08-1	GH_A08G0828	1.58	2.97	1.49	3.2	1.71	2.71	1.94	0.96	1.13	0.31
Cluster-Chr08-1	GH_A08G0829	28.23	31.04	48.67	44.02	60.71	68.49	75.02	59.53	41.45	42.6
Cluster-Chr08-1	GH_A08G0830	5.55	6.17	3.24	2.98	0.48	0.4	0.77	0.83	4.62	4.15
Cluster-Chr08-1	GH_A08G0833	0.32	0.36	0.77	0.74	0.23	0	0.1	0	1.21	0.14
Cluster-Chr08-1	GH_A08G0835	0.56	0.36	1.83	1.39	2.55	1.79	0.83	1.23	0.72	1.36
Cluster-Chr08-1	GH_A08G0838	1.06	0.94	0.31	0.12	0	0	0	0	0	0
Cluster-Chr08-1	GH_A08G0841	28.61	32.67	28.36	30.62	19.56	26.75	18.58	19.89	20.8	14.67
Cluster-Chr08-1	GH_A08G0843	2.49	0	0.6	0.04	0.32	0	0	0	0.23	0.05
Cluster-Chr08-1	GH_A08G0844	3.2	0.08	1.08	0	0.28	0	0.19	0	0.25	0
Cluster-Chr08-1	GH_A08G0845	8.15	3.5	2.69	1.17	3.8	1.42	0.68	0.32	1.08	0.56
Cluster-Chr08-1	GH_A08G0846	18.19	22.11	10.47	8.07	4.76	4.29	3.68	4.23	8.17	3.64
Cluster-Chr08-1	GH_A08G0847	6.16	6.76	2.5	2.29	0.75	1.09	0.34	0.73	0.59	0.62
Cluster-Chr08-1	GH_A08G0848	9.97	14.38	5.18	10.73	0.8	4.89	1.14	3.68	27.84	6.86
Cluster-Chr08-1	GH_A08G0853	1.78	0.06	1	0	0.6	0	0.47	0	0.57	0
Cluster-Chr08-1	GH_A08G0854	0.32	0.52	1.19	0.91	0.13	0.46	0.38	0.33	1.01	0.41
Cluster-Chr08-1	GH_A08G0859	14.53	18.52	7.24	6.51	3.43	3.49	3.82	3.4	4.28	2.21
Cluster-Chr08-1	GH_A08G0860	36.79	18.16	518.8	661.86	858.77	975.73	989.76	934.59	710.89	687.03
Cluster-Chr08-1	GH_A08G0862	1.03	1.49	0.16	0.32	0.59	0.35	0.88	0.16	0.63	0.55
Cluster-Chr08-1	GH_A08G0863	2.62	3.33	0.29	0.09	0	0.05	0	0	0.17	0.15
Cluster-Chr08-1	GH_A08G0865	8.11	3.05	10.28	1.88	5.19	0.56	6.07	0.53	5.35	0.16
Cluster-Chr08-1	GH_A08G0866	6.83	6.83	2.03	1.67	0.57	0.48	0.33	0.57	1	0.32
Cluster-Chr08-1	GH_A08G0867	1.41	1.73	2.63	1.51	0.6	0.32	0.04	0.03	0.07	0.05
Cluster-Chr08-1	GH_A08G0868	23.54	25.05	3.29	6.02	1.18	3.24	1.52	3.33	0.61	1.3
Cluster-Chr08-1	GH_A08G0869	0.17	1.1	0.13	0.31	0	0.21	0	0.13	0	0.06
Cluster-Chr08-1	GH_A08G0873	19.8	25.01	16.73	15.09	10.45	8.73	8.95	5.89	5.55	3.82
Cluster-Chr08-1	GH_A08G0874	9.86	10.56	7.66	7.99	6.3	5.96	8.59	8.25	11.63	7.5
Cluster-Chr08-1	GH_A08G0876	1.69	0.61	0.46	0.23	0.23	0.13	0.35	0	0.21	0.16
Cluster-Chr08-1	GH_A08G0878	22.23	27.24	31.21	36.55	22.51	43.02	19.83	52.63	20.25	29.86
Cluster-Chr08-1	GH_A08G0881	7.04	6.45	2.27	3.32	1.46	1.63	0.75	0.47	0.85	0.71
Cluster-Chr08-1	GH_A08G0882	11.97	11.33	26.69	33.18	22.34	35.34	38.47	29.27	24.9	23.41
Cluster-Chr08-1	GH_A08G0883	0	0	0.61	0.05	1.04	0.22	0.37	0.25	1.24	0
Cluster-Chr08-1	GH_A08G0884	24.92	33.83	48.84	63.5	48.39	72.05	46.98	78.96	35.92	46.08
Cluster-Chr08-1	GH_A08G0886	9.63	9.49	8.13	9.03	6.55	7.89	7.79	8.87	7.39	5.24
Cluster-Chr08-1	GH_A08G0887	43.92	42.47	53.32	25.54	40.94	43.93	74.73	29.91	24.67	12.73
Cluster-Chr08-1	GH_A08G0889	5.85	1.72	29.99	3.75	15.82	4.02	15.97	2.18	9.09	0.59
Cluster-Chr08-1	GH_A08G0890	11.66	7.28	4.83	2.85	2.98	2.56	1.9	1.81	2.86	1.01
Cluster-Chr08-1	GH_A08G0891	3.59	0.08	2.1	0.03	0.93	0.02	0.83	0.04	0.65	0.04
Cluster-Chr08-1	GH_A08G0892	0.11	0.19	0.19	0.23	0.45	0.65	27.36	78.95	87.47	39.56
Cluster-Chr08-1	GH_A08G0895	10.35	15.19	2.06	4.18	1.73	1.11	0.93	0.26	0.89	0.25
Cluster-Chr08-1	GH_A08G0900	1.96	2.24	1.21	1.07	0.11	0.23	0.12	0.3	0.99	0.33
Cluster-Chr08-1	GH_A08G0901	10.09	9.14	5.86	4.47	5.58	3.25	3.52	1.84	1.99	2.26
Cluster-Chr08-1	GH_A08G0902	0.52	5.32	0.3	1.26	0.66	1.47	1.36	1.05	0.31	0.78
Cluster-Chr08-1	GH_A08G0903	4.89	4.96	0.39	0.48	1.18	0.4	5.24	4.13	0.25	0.04
Cluster-Chr08-1	GH_A08G0908	0.9	0.24	0.38	1.36	0.17	1.49	0.12	0.21	0	0.09
Cluster-Chr08-1	GH_A08G0911	8.84	14.03	12.49	12.65	8.44	12.38	11.9	9.17	7.68	8.79
Cluster-Chr08-1	GH_A08G0914	1.2	0.66	0	0.32	0.07	0.07	0.17	0.09	0.47	0.1
Cluster-Chr08-1	GH_A08G0915	1.6	0.84	0.52	0.68	0.14	0.14	0	0.16	0.13	0.05
Cluster-Chr08-1	GH_A08G0916	9.32	18.32	1.03	0.9	0.04	0	0.05	0.06	0.01	0.02
Cluster-Chr08-1	GH_A08G0918	11.95	9.98	1.87	0.91	0.66	0.35	0.55	0.47	1.14	0.62
Cluster-Chr08-1	GH_A08G0922	26.06	20.15	14.29	17.55	22.94	28.05	12.02	19.62	6.4	25.12
Cluster-Chr08-1	GH_A08G0925	10.78	13.63	16.71	19.07	14.54	15.51	14.34	14.98	16.64	14.98
Cluster-Chr08-1	GH_A08G0927	6.97	10.81	2.96	4.59	1.33	2.4	0.71	0.92	0.63	0.58
Cluster-Chr08-1	GH_A08G0928	0.62	0.61	0.25	1.27	0	0.01	0	0	0	0
Cluster-Chr08-1	GH_A08G0930	7.94	14.01	14.24	22.32	9.6	16.78	10.3	14.97	5.39	5.71
Cluster-Chr08-1	GH_A08G0939	17.58	18.12	17.53	16.04	15.59	16.78	19.46	16.61	18.71	14.21
Cluster-Chr08-1	GH_A08G0940	6.34	7.6	1.28	1.34	0.74	0.41	1.16	0.16	1.36	0.85
Cluster-Chr08-1	GH_A08G0941	11.72	13.7	18.58	10.07	6.25	5.29	5.22	0.84	4.03	3.55
Cluster-Chr08-1	GH_A08G0942	10.06	14.6	4.97	5.88	2.79	3.37	2.1	1.94	3.12	1.3
Cluster-Chr08-1	GH_A08G0945	1.26	1.08	0.26	0.15	0.06	0.15	0	0	0.08	0
Cluster-Chr08-1	GH_A08G0946	20.23	16.19	16.04	15.07	11.66	13.09	16.72	15.57	26.29	28.8
Cluster-Chr08-1	GH_A08G0948	16.32	23.61	8.15	9.6	9.85	10.69	11.81	47.79	14.84	6.91
Cluster-Chr08-1	GH_A08G0950	0.12	18.24	0.14	9.47	0.04	9.78	0.08	13.07	0.03	7.67
Cluster-Chr08-1	GH_A08G0951	49.66	43.15	6.06	8.23	5.76	7.02	26.67	21.55	36.38	18.11
Cluster-Chr08-1	GH_A08G0953	7.29	1.88	1.23	0.45	0.14	0.06	0.28	0.27	1.9	0.4
Cluster-Chr08-1	GH_A08G0954	5.89	3.82	8.08	4.3	3.51	0.94	10.21	8.14	27.36	18.21
Cluster-Chr08-1	GH_A08G0956	16.5	15.23	5.53	3.3	2.89	1.74	3.39	0.57	2.46	1.54
Cluster-Chr08-1	GH_A08G0958	0.77	2.43	1.92	1.29	0.04	0.14	0.26	3.16	0.68	22.37
Cluster-Chr08-1	GH_A08G0963	0.36	0.76	0.33	0.1	0.11	0.19	0.37	0.08	2.55	0.54
Cluster-Chr08-1	GH_A08G0967	2.94	5.3	1.99	5.37	1.81	4.76	1.55	5.01	2.4	3.81
Cluster-Chr08-1	GH_A08G0969	29.63	11.8	29.9	34.68	28.13	24.23	7.02	8.64	7.94	4.74
Cluster-Chr08-1	GH_A08G0970	2.96	7.22	1.7	2.26	0.98	1.21	0.84	1.14	1.08	1.18
Cluster-Chr08-1	GH_A08G0971	6.08	9.99	1.58	2.18	0.15	0.19	0	0	0.18	0.13
Cluster-Chr08-1	GH_A08G0974	14.69	15.38	19.41	16.81	14.23	18.64	14.42	9.96	12.31	7.18
Cluster-Chr08-1	GH_A08G0978	48.46	32.19	31.81	19.67	43.93	22.55	45.64	13.38	27.05	12.41
Cluster-Chr08-1	GH_A08G0983	41.35	33	210.27	159.81	303.34	221.71	144.95	47.59	27.74	10.62
Cluster-Chr08-1	GH_A08G0986	13.15	10.43	3.52	3.7	0.64	2.12	1.85	2.52	2.97	3.3
Cluster-Chr08-1	GH_A08G0989	15.18	12.18	5.34	3.99	0.3	0.66	2.17	0.9	3.22	2.73
Cluster-Chr08-1	GH_A08G0990	0.42	0.07	0.73	0.09	3.92	1.48	0.13	0.71	0	0.13
Cluster-Chr08-1	GH_A08G0992	4.06	4.16	5.3	6.21	5.86	7.53	5.67	4.55	2.56	1.28
Cluster-Chr08-1	GH_A08G0993	2.85	2.22	2.04	1.64	2.96	2.46	3.61	2.78	1.87	2.48
Cluster-Chr08-1	GH_A08G0995	12.75	0.9	97.69	7.54	113.07	12.15	349.79	54.27	464.81	26.8
Cluster-Chr08-1	GH_A08G0996	10.42	9.75	29.95	13.02	22.24	19.36	36.11	258.1	43.36	51.34
Cluster-Chr08-1	GH_A08G0997	0.45	1.36	0.6	1.83	1.16	1.98	0.48	0.46	0.28	0.39
Cluster-Chr08-1	GH_A08G0999	30.52	27.62	14.31	6.22	12.83	3.98	14.88	3.57	21.74	5.61
Cluster-Chr08-1	GH_A08G1000	2.54	4.04	3.17	4.96	2.37	4.55	2.9	1.34	2.18	0.99
Cluster-Chr08-1	GH_A08G1001	39.57	39.7	15.5	16.19	8.25	9.05	9.02	9.55	11.47	8.92
Cluster-Chr08-1	GH_A08G1004	13.25	12.74	6.85	6.37	3.65	4.02	6.42	4.77	6.9	4.89
Cluster-Chr08-1	GH_A08G1005	4.4	6.67	3.8	4.46	4.09	5.2	5.04	5.67	4.48	2.78
Cluster-Chr08-1	GH_A08G1006	12.03	3.54	13.09	1.32	8.56	1.29	10.34	1.34	8.53	0.85
Cluster-Chr08-1	GH_A08G1009	0	0	0	0	0	0.25	0.02	2.15	0	0.26
Cluster-Chr08-1	GH_A08G1010	5.39	5.79	3.24	4.06	2.15	3.35	2.36	2.54	2.12	1.15
Cluster-Chr08-1	GH_A08G1012	7.3	27.67	1.55	5.95	0.15	0.34	0.15	0.17	0.32	0
Cluster-Chr08-1	GH_A08G1013	6.07	6.8	6.39	5.54	4.11	4.08	3.54	2.95	2.78	1.49
Cluster-Chr08-1	GH_A08G1014	13.9	8.07	7.76	3.1	10.09	1.67	6.62	0.66	5.08	0.89
Cluster-Chr08-1	GH_A08G1015	37.04	28.37	17.35	11.1	8.18	7.43	6.32	3.59	5.35	3.42
Cluster-Chr08-1	GH_A08G1016	2.42	2.93	1.46	1.61	0.9	1.52	1.29	1.72	1.52	0.89
Cluster-Chr08-1	GH_A08G1018	0.1	0.57	0.28	1.58	0.38	2.52	0.29	1.38	0.1	0.64
Cluster-Chr08-1	GH_A08G1020	0.04	0	0.03	0.1	0.1	0.18	0.45	0.31	1.79	1.22
Cluster-Chr08-1	GH_A08G1021	26.94	22.87	19.93	14.5	15.13	14.68	14.37	11.59	14.37	6.27
Cluster-Chr08-1	GH_A08G1023	15.1	14.44	7.35	6.74	7.48	6.17	3.6	1.01	1.92	1.36
Cluster-Chr08-1	GH_A08G1024	0.47	2.36	0.92	15.14	2.12	14.05	0.97	1.25	0.65	1.07
Cluster-Chr08-1	GH_A08G1027	19.32	17.94	24.32	22.87	20.51	23.24	19.09	17.83	12.06	13.25
Cluster-Chr08-1	GH_A08G1028	4.72	5.65	4	3.53	2.26	3.59	2.64	3.14	2.53	1.48
Cluster-Chr08-1	GH_A08G1029	14.53	9.83	3.66	3.38	2.43	3.15	1.77	1.05	2.1	2.05
Cluster-Chr08-1	GH_A08G1030	204.71	104.67	40.33	55.59	20.52	23.12	38.23	23.84	20.94	15.49
Cluster-Chr08-1	GH_A08G1033	0	0	0	0	0	0	0	0.08	0	1.06
Cluster-Chr08-1	GH_A08G1035	1.56	2.7	0.58	0.68	0.34	0.83	0.37	0.4	0.28	0.17
Cluster-Chr08-1	GH_A08G1036	30.06	29.52	30.54	34.01	73.09	46.82	81.13	42.9	67.14	41.36
Cluster-Chr08-1	GH_A08G1040	16.35	26.46	117.52	146.77	105.1	123.71	40.08	25.66	11.14	3.9
Cluster-Chr08-1	GH_A08G1046	23.67	9.95	6	1.38	0.67	0.18	0.67	0.36	1.84	0.58
Cluster-Chr08-1	GH_A08G1049	5.02	6.09	4.39	5.34	2.57	3.12	1.86	1.37	1.8	1.24
Cluster-Chr08-1	GH_A08G1051	13.37	18.43	4.17	11.2	2.99	9.15	3.29	8.25	4.09	8.59
Cluster-Chr08-1	GH_A08G1052	2.07	2.57	0.5	0.4	0.43	0.11	0.81	0.71	0.66	0.4
Cluster-Chr08-1	GH_A08G1053	3.84	4.09	1.81	1.82	0.98	0.79	0.85	0.52	0.69	0.35
Cluster-Chr08-1	GH_A08G1057	8.6	5.57	2.95	1.4	0	0.3	0.35	0.2	1.65	0.62
Cluster-Chr08-1	GH_A08G1059	3.33	4.27	3.51	4.6	2.43	3.81	2.33	2.59	3.52	7.43
Cluster-Chr08-1	GH_A08G1060	14.28	17.4	3.77	3.91	1.04	1.82	2.56	1.71	4.33	3.11
Cluster-Chr08-1	GH_A08G1061	6.38	5.98	5.21	4.9	2.96	3.66	2.76	2.53	2.43	2.24
Cluster-Chr08-1	GH_A08G1065	17.72	15.05	8.18	3.98	4.92	2.21	5.43	1.08	4.8	2.58
Cluster-Chr08-1	GH_A08G1066	8.7	8.84	6.79	7.62	6.13	6.47	4.57	3.6	6.91	5.3
Cluster-Chr08-1	GH_A08G1070	0	2.26	0	0.34	0	0.52	0	0.21	0	0.17
Cluster-Chr08-1	GH_A08G1082	1.35	2.69	0.45	0.7	0.15	0.46	0.06	0.28	0.15	0.15
Cluster-Chr08-1	GH_A08G1085	1.92	1.83	5.22	5.88	7.36	5.98	5.94	2.22	0.84	0.35
Cluster-Chr08-1	GH_A08G1086	6.56	1.55	4.23	2.29	2.15	2.93	1.71	0.71	1.57	0.21
Cluster-Chr08-1	GH_A08G1088	8.05	8.19	5.59	3.44	3.66	2.63	6.69	4.07	7.71	4.09
Cluster-Chr08-1	GH_A08G1090	12.45	14.27	4.76	5.11	2.91	3.07	2.97	2.4	3.37	3.25
Cluster-Chr08-1	GH_A08G1091	3.97	6.32	1.68	2.43	1.56	2.38	1.83	1.96	1.37	1.07
Cluster-Chr08-1	GH_A08G1095	13.64	13.23	19.11	23.38	11.27	16.78	11.03	9.66	8.24	6.93
Cluster-Chr08-1	GH_A08G1101	1.41	0.65	0.81	1.65	1.33	1.18	1.14	0.29	0.39	1.26
Cluster-Chr08-1	GH_A08G1103	11.73	10.72	11.85	7.19	6.41	6.31	7.23	4.3	5.86	2.84
Cluster-Chr08-1	GH_A08G1104	13.1	12.4	6.32	6.52	6.07	4.77	2.81	2.29	2.72	1.8
Cluster-Chr08-1	GH_A08G1107	1.07	1.95	1.4	0.99	0.18	0.2	0.23	0.3	1.21	0.16
Cluster-Chr08-1	GH_A08G1110	4.65	6.81	3.65	4.4	2.11	3.88	4.93	6.06	5.42	4.71
Cluster-Chr08-1	GH_A08G1111	14.95	10.6	1.01	1.39	0.06	0.02	0.06	0.02	0.02	0.04
Cluster-Chr08-1	GH_A08G1112	1.06	0.44	0.63	0.62	0.34	0.49	0.08	0.15	0.22	0.22
Cluster-Chr08-1	GH_A08G1119	25.64	0.08	22.4	0.15	10.75	0.1	3.14	0.05	2.93	0.12
Cluster-Chr08-1	GH_A08G1121	14.69	10.29	18.11	11.07	16.38	13.65	27.86	28.61	22.29	65.1
Cluster-Chr08-1	GH_A08G1122	12.45	11.71	17.06	19.89	17.45	27.2	23.7	37.04	27.83	41.47
Cluster-Chr08-1	GH_A08G1127	0.31	0.24	0	0.07	0.03	0.03	0.05	0.14	0.95	1.69
Cluster-Chr08-1	GH_A08G1128	6.57	8.19	32.61	38.96	67.81	61.75	95.96	79.57	95.52	96.21
Cluster-Chr08-1	GH_A08G1129	5.38	7.35	1.71	2.23	0.44	0.67	0.64	0.4	0.83	0.85
Cluster-Chr08-1	GH_A08G1130	30.01	26.39	41.34	37.86	37.09	34.74	25.04	17.22	12	21.02
Cluster-Chr08-1	GH_A08G1131	12.86	8.4	1.41	0.78	0.2	0.04	0.03	0	0.05	0.11
Cluster-Chr08-1	GH_A08G1134	1.16	0.64	1.2	1.4	0.13	0.64	0.35	0.23	1.04	0.27
Cluster-Chr08-1	GH_A08G1135	8.91	7.77	4.05	2.59	7.61	8.56	12.95	16.34	14.55	12.52
Cluster-Chr08-1	GH_A08G1136	75.95	37.59	324.71	352.85	898.48	739	756.14	663.34	1387.59	1721.73
Cluster-Chr08-1	GH_A08G1138	1.47	1.03	1.54	0.4	0.94	0.54	1.52	0.7	4.39	1.2
Cluster-Chr08-1	GH_A08G1139	0.23	2.99	0.05	0.92	0.09	0.23	0.04	0.11	0	0.12
Cluster-Chr08-1	GH_A08G1141	1.83	1.72	0.4	0.26	0.08	0.09	0.07	0.04	0.43	0.28
Cluster-Chr08-1	GH_A08G1142	5.95	5.62	1.62	3.38	1.22	1.35	0.81	0.72	1	1.15
Cluster-Chr08-1	GH_A08G1147	1.23	0.69	0.84	0.21	0.65	0.06	2.54	0.26	7.57	3
Cluster-Chr08-1	GH_A08G1150	0.19	0.05	1.14	0.12	7.03	1.98	10.34	7.11	19.1	17.64
Cluster-Chr08-1	GH_A08G1152	5.7	17.45	2.34	1.41	0.08	0.04	0	0	0.03	0.03
Cluster-Chr08-1	GH_A08G1153	1.64	4.14	0.77	0.5	0.82	0.22	0.51	0.25	0.32	0.66
Cluster-Chr08-1	GH_A08G1154	84.5	71.44	59.09	41.04	73.61	64.58	76.31	44.25	85.17	86.4
Cluster-Chr08-1	GH_A08G1155	0.38	0.66	0.95	2.06	0.18	0.61	0.08	0.21	0.06	0.25
Cluster-Chr08-1	GH_A08G1160	5.9	8.11	2.09	1.8	0.83	1.8	0.81	0.61	1.24	0.99
Cluster-Chr08-1	GH_A08G1161	0.38	1.57	0.08	0.09	0	0	0.02	0	0	0.07
Cluster-Chr08-1	GH_A08G1166	15.68	20.65	19.93	17.37	10.91	20.93	13.84	19.64	14.49	18.81
Cluster-Chr08-1	GH_A08G1167	7.25	9.06	3.58	3.42	2.01	1.89	2.68	1.69	2.59	1.43
Cluster-Chr08-1	GH_A08G1170	2.86	1.08	1.19	0.33	2.1	0.08	3.7	0.65	10.73	6.14
Cluster-Chr08-1	GH_A08G1171	6.95	4.11	1.32	0.89	0.41	0.08	0.41	0.12	1.1	0.53
Cluster-Chr08-1	GH_A08G1172	9.4	6.35	4.85	4.8	3.37	3.72	2.63	1.13	2.59	1.57
Cluster-Chr08-1	GH_A08G1175	6.36	7.1	2.61	2.28	1.44	0.99	0.66	0.5	0.93	0.34
Cluster-Chr08-1	GH_A08G1176	23.69	27.43	6.29	6.54	4.7	2.85	2.79	2.29	3.57	2.17
Cluster-Chr08-1	GH_A08G1177	1.01	0.81	0.23	0.33	0.2	0.18	0.16	0.11	0.06	0.09
Cluster-Chr08-1	GH_A08G1179	12.65	0.23	11.53	0.42	1.44	0.1	0.87	0.06	2.92	0.07
Cluster-Chr08-1	GH_A08G1180	2.47	2.58	2.76	2.19	2.11	2.52	1.06	1.13	0.39	1.05
Cluster-Chr08-1	GH_A08G1181	14.41	15.14	26.18	29.07	27.32	36.58	32.77	29.85	24.51	22.58
Cluster-Chr08-1	GH_A08G1182	10.36	8.94	7.65	5.83	5.04	5.64	5.99	4.3	5.69	5.18
Cluster-Chr08-1	GH_A08G1184	21.96	25.18	8.29	9.19	5.94	8.65	5.17	5.3	9.66	6.25
Cluster-Chr08-1	GH_A08G1187	0	0	0.06	0	1.06	0.07	2.59	0.51	0.25	0.65
Cluster-Chr08-1	GH_A08G1188	0.03	0.08	3.73	1.55	0	0	0	0.03	0.21	0.25
Cluster-Chr08-1	GH_A08G1190	3.11	2.06	1.36	0.85	1.04	0.7	1.17	1.49	2.34	1.22
Cluster-Chr08-1	GH_A08G1191	0.06	0.12	3.43	2.71	0.06	0	0.17	0.14	1.22	0.67
Cluster-Chr08-1	GH_A08G1192	0.1	0.41	0.06	0.07	0.33	0.16	0.37	0.59	5.41	0.59
Cluster-Chr08-1	GH_A08G1193	9.4	0.1	1.49	0.03	1.14	0.03	1.36	0.16	1.76	0.04
Cluster-Chr08-1	GH_A08G1194	1.23	0.08	0.52	0.06	0.22	0.06	0.56	0.07	1.29	0.43
Cluster-Chr08-1	GH_A08G1195	8.2	7.43	5.56	3.6	2.54	1.76	2.47	0.88	2.2	0.88
Cluster-Chr08-1	GH_A08G1196	0	0	0.04	0.08	0.03	0.03	0.47	0.33	10.36	4.87
Cluster-Chr08-1	GH_A08G1198	11.71	18.63	29.83	22.66	22.16	15.55	16.52	7.64	7.96	4.63
Cluster-Chr08-1	GH_A08G1199	8.44	8.07	3.71	3.52	2.17	1.89	1.75	1.34	1.83	0.88
Cluster-Chr08-1	GH_A08G1204	16.56	27.7	1.75	1.67	0.14	0.21	0.12	0.18	0.32	0.17
Cluster-Chr08-1	GH_A08G1206	4.53	3.55	5.33	2.54	4.66	2.75	5.44	1.96	4.43	1.41
Cluster-Chr08-1	GH_A08G1208	20.05	20.22	8.65	7.31	6.62	5.93	6.71	7.06	6.95	6.58
Cluster-Chr08-1	GH_A08G1209	7.69	8.69	0.46	1.23	0.24	0.81	0.18	0.11	0.13	0.25
Cluster-Chr08-1	GH_A08G1212	14.9	13.74	3.67	4.3	3.18	3.4	3.36	3.34	2.95	4.01
Cluster-Chr08-1	GH_A08G1213	1.2	0.07	0.17	0.02	0.06	0	0.07	0.02	0.08	0
Cluster-Chr08-1	GH_A08G1214	4.74	8.23	64.6	47.24	129.05	167.38	71.11	187.46	25.83	79.9
Cluster-Chr08-1	GH_A08G1216	25.54	22.71	23.86	12.53	11.16	6.08	11.84	3.77	17.61	5.89
Cluster-Chr08-1	GH_A08G1217	12.25	16.95	8.41	8.74	6.25	5.26	2.76	3.98	2.85	1.96
Cluster-Chr08-1	GH_A08G1218	9.03	9.15	3.88	3.49	0.82	1.08	1.74	1.37	2.79	1.54
Cluster-Chr08-1	GH_A08G1219	60.48	53.33	49.82	46.3	31.59	44.73	35.11	27.96	15.56	26.97
Cluster-Chr08-1	GH_A08G1220	6.42	7.66	9.5	12.63	13.59	14.37	14	8.05	7.89	4.4
Cluster-Chr08-1	GH_A08G1221	4.83	1.88	2.37	0.63	1	0.39	0.63	0	0.17	0.07
Cluster-Chr08-1	GH_A08G1222	43.91	13.04	363.42	50.38	206.87	20.92	14.11	1.27	2.45	0.65
Cluster-Chr08-1	GH_A08G1223	34.51	22.13	19.72	17.87	7.34	13.78	6.23	6.62	7.09	4.29
Cluster-Chr08-1	GH_A08G1224	6.58	6.33	2.6	2.52	1.28	2.18	0.76	1.26	0.83	0.75
Cluster-Chr08-1	GH_A08G1226	8.9	17.22	12.65	10.97	7.36	10.26	6.83	10.51	6.95	8.47
Cluster-Chr08-1	GH_A08G1227	10.77	9.31	12.15	9.29	7.7	7.48	7.1	5.08	4.21	3.64
Cluster-Chr08-1	GH_A08G1231	21.24	39.04	24.98	11.39	17.48	6.94	15.39	4.94	8.64	2
Cluster-Chr08-1	GH_A08G1232	1.13	0.38	1.17	0.43	2.13	1.52	0.94	0.39	0.43	0.15
Cluster-Chr08-1	GH_A08G1234	39.68	56.85	26.65	47.33	10.36	7.67	3.02	1.19	2.03	0.71
Cluster-Chr08-1	GH_A08G1235	0	0	0.02	1.21	0	0.7	0	0.55	0	0.13
Cluster-Chr08-1	GH_A08G1236	0	0.1	0	0.23	0.04	1.05	0.09	0.51	0.19	0
Cluster-Chr08-1	GH_A08G1237	0.31	0.2	0.28	0.42	1.34	0.95	1.58	0.47	1.68	1.09
Cluster-Chr08-1	GH_A08G1238	0.99	1.09	0.19	0.24	0.05	0.09	0.05	0	0.61	0.11
Cluster-Chr08-1	GH_A08G1239	3.09	3.3	3.49	3.43	3.19	3.54	1.83	1.24	1.42	1.22
Cluster-Chr08-1	GH_A08G1240	7.55	3.51	1.31	1.43	0.2	0.13	0.05	0.1	0.13	0
Cluster-Chr08-1	GH_A08G1241	3.51	2.35	0.89	1.78	0.13	0.72	0.05	0.63	0.03	0.17
Cluster-Chr08-1	GH_A08G1242	4.14	4.63	2.67	1.39	1.91	0.74	2.06	1.45	0.81	1.22
Cluster-Chr08-1	GH_A08G1245	2.55	4.59	1.35	2.1	0.59	0.73	0.49	0.34	0.43	0.26
Cluster-Chr08-1	GH_A08G1247	4.4	7.9	6.85	11.66	8.47	17.5	7.04	19.6	6	18.8
Cluster-Chr08-1	GH_A08G1248	5.76	6.07	0.45	2.66	0.13	0.57	0	0	0.03	0
Cluster-Chr08-1	GH_A08G1249	18.01	29.76	7.11	5.46	3.42	1.24	1.98	0.85	2.71	1.98
Cluster-Chr08-1	GH_A08G1250	0.86	1.39	2.53	3.81	10.74	7.71	5.68	5.82	7.21	7.07
Cluster-Chr08-1	GH_A08G1251	11.06	9.77	21.61	21.63	14.47	20.73	13.87	10.25	8.72	8.05
Cluster-Chr08-1	GH_A08G1252	6.35	6.73	10.23	10.7	6.52	10.87	8.26	7.25	6.71	6.47
Cluster-Chr08-1	GH_A08G1253	19.82	20.91	44.87	42.77	22.88	31.21	12.79	14.47	9.57	16.6
Cluster-Chr08-1	GH_A08G1254	6.26	4.26	2.07	0.66	1.24	0.53	0.03	0.11	0.03	0.03
Cluster-Chr08-1	GH_A08G1255	3.57	0.01	1.85	0.01	0.16	0.01	0.06	0.02	0.42	0
Cluster-Chr08-1	GH_A08G1256	0.63	0.44	1.66	0.31	1.55	0.59	1.34	0.14	1.52	0.39
Cluster-Chr08-1	GH_A08G1258	6.12	6.87	29.43	25.67	25.98	32.87	38.06	16.55	26.56	14.65
Cluster-Chr08-1	GH_A08G1260	20.83	25.91	14.11	18.48	6.19	13.44	4.57	7.8	5.92	7.51
Cluster-Chr08-1	GH_A08G1261	11.72	10.9	5.59	5.28	3.15	2.64	2.84	2.39	3.74	1.44
Cluster-Chr08-1	GH_A08G1262	8.12	16.33	28.11	35.69	103.14	147.05	100.97	74.51	92.92	81.34
Cluster-Chr08-1	GH_A08G1264	4.89	4.99	27.49	24.13	28.26	27.78	18.73	28.11	12.28	16.23
Cluster-Chr08-1	GH_A08G1265	10.54	6.7	22.43	2.42	15.96	1.44	12.91	1.35	12.67	1.39
Cluster-Chr08-1	GH_A08G1266	5.1	8.05	3.11	1.98	0.79	0.83	0.79	0.36	1.53	1.09
Cluster-Chr08-2	GH_A08G1383	2.59	7.76	16.4	18.66	35.07	6.81	1.5	0.12	0.17	0.13
Cluster-Chr08-2	GH_A08G1387	1.44	5.12	0.31	3.03	0.08	1.58	0.18	0.8	0.06	0.9
Cluster-Chr08-2	GH_A08G1389	13.67	12.24	4.19	4.31	1.37	1.36	1.34	1.4	3.3	0.97
Cluster-Chr08-2	GH_A08G1393	34.97	33.04	17.26	15.25	14.3	13.17	16.77	12.17	15.9	12.82
Cluster-Chr08-2	GH_A08G1395	5.37	6.35	2.54	2.52	0.89	1.24	0.51	0.67	1.32	1.23
Cluster-Chr08-2	GH_A08G1397	0.55	2.2	0.92	1.98	0.49	0.47	0.04	0.04	0	0
Cluster-Chr08-2	GH_A08G1400	1.32	3.01	0.55	0.84	0.04	0.21	0	0	0	0.6
Cluster-Chr08-2	GH_A08G1401	6.24	6.73	2.66	2.36	1.5	1.09	1.82	1.35	1.5	1.06
Cluster-Chr08-2	GH_A08G1404	0.28	0.29	0.87	0.76	0.06	0.2	0.11	1.03	4.19	13.82
Cluster-Chr08-2	GH_A08G1408	9.2	10.15	8.84	8.65	10.33	9.97	10.04	11.61	7.31	6.05
Cluster-Chr08-2	GH_A08G1409	24.23	25.51	6.38	9.37	2.66	4.54	1.86	1.6	2.32	2.11
Cluster-Chr08-2	GH_A08G1412	28.6	25.25	30.72	20.34	4.02	23.51	5.37	7.26	6.81	3.77
Cluster-Chr08-2	GH_A08G1413	7.35	8.51	1.58	2.23	1.01	0.84	0.45	0.38	0.83	0.35
Cluster-Chr08-2	GH_A08G1414	4.11	6.41	41.26	52.14	51.09	76.03	47.28	76.92	27.53	21.83
Cluster-Chr08-2	GH_A08G1415	7.4	6.91	5.36	3.73	2.95	0.89	0.68	0.65	0.88	1.23
Cluster-Chr08-2	GH_A08G1416	8.72	9.42	28.28	31.66	29.49	33.86	31.92	31	19.69	15.9
Cluster-Chr08-2	GH_A08G1417	3.25	4.28	0.4	1.44	0.09	0.12	0.04	0.33	0.03	0
Cluster-Chr08-2	GH_A08G1418	47.64	49.89	123.08	156.88	109.94	157.61	138.7	128.18	111.22	103.37
Cluster-Chr08-2	GH_A08G1419	1.42	1.19	11.33	3.76	9.27	3.76	12.44	6.95	6.37	2.92
Cluster-Chr08-2	GH_A08G1420	0.04	0.01	4.83	1.75	3.15	0.51	0.28	0.06	0.11	0.01
Cluster-Chr08-2	GH_A08G1421	14.63	17.02	3.12	3.74	0.56	0.84	2.13	2.44	11.49	16.75
Cluster-Chr08-2	GH_A08G1422	14.02	12.13	2.28	2.06	0.36	0.27	2.08	1.98	3.78	1.44
Cluster-Chr08-2	GH_A08G1424	25.4	24.24	12.89	10.96	14.08	10.85	20.21	14	21.8	15.37
Cluster-Chr08-2	GH_A08G1430	2.29	2.79	1.21	1.1	1.67	1.92	0.77	1.83	2.28	3.75
Cluster-Chr08-2	GH_A08G1431	0.21	0.39	4.71	1.88	2.57	1.27	0.55	0.08	0.64	0.05
Cluster-Chr08-2	GH_A08G1432	8.69	12.87	4.31	5.55	1.51	3.93	0.99	1.81	1.21	1
Cluster-Chr08-2	GH_A08G1433	33.58	35.11	43.57	49.64	28.89	39.89	22.3	25.76	17.36	13.8
Cluster-Chr08-2	GH_A08G1435	4.96	5.73	1.32	1.36	0.36	0.27	0.81	0.69	0.98	0.78
Cluster-Chr08-2	GH_A08G1437	0.45	0.21	0.72	1.17	1.31	1.72	0.08	0.25	0.84	0.9
Cluster-Chr08-2	GH_A08G1438	42.01	46.75	19.16	19.39	12.72	12.31	8.78	8.72	9.75	6.2
Cluster-Chr08-2	GH_A08G1439	14.58	16.56	7.31	6.74	2.79	4.16	2.92	2.65	3.71	2.4
Cluster-Chr08-2	GH_A08G1442	2.15	1.69	0.62	0.32	0.54	0.78	0.46	0.15	0.88	0.39
Cluster-Chr08-2	GH_A08G1447	22.56	26.32	61.52	68.67	96.7	95.1	110.59	102.12	72.1	85.77
Cluster-Chr08-2	GH_A08G1449	68.62	58.25	114.49	258.38	174.76	296.52	234.52	288.13	226.32	324.05
Cluster-Chr08-2	GH_A08G1451	109.46	114.6	88.5	110.53	53.62	41.5	37.18	26.15	31.02	18.08
Cluster-Chr08-2	GH_A08G1454	6.29	10.26	3.02	4.66	2.28	1.94	1.36	0.58	1.31	0.34
Cluster-Chr08-2	GH_A08G1455	1.52	2.16	0.68	0.67	2.2	0.39	2.34	0.28	3.71	1.4
Cluster-Chr08-2	GH_A08G1456	18.97	9.97	4.67	3.85	6.86	6.34	11.56	18.51	45.16	23.2
Cluster-Chr08-2	GH_A08G1458	1.05	0.83	0.05	0.18	0	0	0.04	0	0.1	0
Cluster-Chr08-2	GH_A08G1462	13.43	9.87	10.59	9.6	5.47	6.24	4.73	6.09	6.45	5.92
Cluster-Chr08-2	GH_A08G1468	11.01	12.28	5.94	5.98	11.96	15.92	13.35	9.1	11.88	4.97
Cluster-Chr08-2	GH_A08G1469	46.38	46.02	20.97	23.53	15.09	17.92	20.37	18.48	19.06	20.59
Cluster-Chr08-2	GH_A08G1473	0.04	0	0.05	0.08	0.15	0.14	4.75	3.56	31.34	23.87
Cluster-Chr08-2	GH_A08G1474	5.94	7.09	2.91	2.21	1.21	1.08	0.62	0.84	1.54	1
Cluster-Chr08-2	GH_A08G1487	5.08	4.97	0.76	0.6	2.69	3.03	6.99	9.94	7.46	4.75
Cluster-Chr08-2	GH_A08G1490	0.21	0.07	12.73	4	42.35	20.23	22.74	16.43	181.07	207.52
Cluster-Chr08-2	GH_A08G1491	61.16	44.88	27.23	19.97	13.01	1.86	23.91	1.59	5.24	1.32
Cluster-Chr08-2	GH_A08G1495	7.81	6.09	6	5.74	4.4	4.29	2.63	1.3	1.7	0.39
Cluster-Chr08-2	GH_A08G1497	8.05	9.26	2.15	3.08	1.32	1.09	0.79	0.9	0.32	0.24
Cluster-Chr08-2	GH_A08G1498	37.46	42.7	12.06	13.02	3.72	5.79	2.83	4.07	3.42	2.01
Cluster-Chr08-2	GH_A08G1504	1.29	0.61	0.33	0.34	0.79	0.31	1.13	0.81	0.82	0
Cluster-Chr08-2	GH_A08G1507	16.98	16.41	11.89	12.13	11.11	10.62	10.13	7.03	10.53	5.93
Cluster-Chr08-2	GH_A08G1510	3.18	5.02	0.36	0.88	0.52	0.63	0.24	0.21	0.36	0.43
Cluster-Chr08-2	GH_A08G1511	49.36	49.73	38.18	33.92	47.92	43.32	60.48	49.63	48.94	43.61
Cluster-Chr08-2	GH_A08G1512	24.57	22.98	16.35	16.22	19.14	17	18.03	15.6	13.59	12.98
Cluster-Chr08-2	GH_A08G1513	3.94	6.95	1.73	1.26	0.42	0.29	0.81	0.51	1.08	0.32
Cluster-Chr08-2	GH_A08G1516	1.36	0.28	0.45	0.23	0.08	0	0.04	0	0.14	0.09
Cluster-Chr08-2	GH_A08G1517	11.95	8.79	26.2	21.6	5.96	13.67	1.39	17.02	1.23	2.69
Cluster-Chr08-2	GH_A08G1518	9.85	8.46	3.14	1.94	0.98	0.84	0.66	0.69	1.9	1.12
Cluster-Chr08-2	GH_A08G1520	30.74	20.75	7.08	3.65	1.49	0.78	1.95	0.6	5.34	2.07
Cluster-Chr08-2	GH_A08G1521	4.51	2.23	1.58	0.45	0.12	0.08	0.49	0.05	0.74	0
Cluster-Chr08-2	GH_A08G1522	27.5	26.56	37.28	48.96	48.96	49.66	71.18	66.54	68.66	59.27
Cluster-Chr08-2	GH_A08G1524	0.16	0.05	0.73	0	2.03	0.02	1.4	0.02	0.89	0.02
Cluster-Chr08-2	GH_A08G1525	5.83	6.29	6.6	5.14	8.22	5.67	2.85	2.19	3.8	2.65
Cluster-Chr08-2	GH_A08G1526	3	29.24	9.66	187.38	14.42	588.85	19.98	647.71	13.17	209.17
Cluster-Chr08-2	GH_A08G1528	5.12	9.86	6.39	7.49	15.26	16.19	19.36	17.16	20.25	26.25
Cluster-Chr08-2	GH_A08G1529	9.16	5.86	13.33	10.39	9.64	8.94	9.62	10.01	8.09	5.56
Cluster-Chr08-2	GH_A08G1530	9.61	11.23	7.22	15.23	4	9.49	2.26	3.24	3.26	3.15
Cluster-Chr08-2	GH_A08G1532	0.57	5.64	3	2.45	0.57	0.76	1.13	0.63	1.25	0.32
Cluster-Chr08-2	GH_A08G1534	51.68	41.63	106.55	101.13	99.64	109.73	101.34	157.68	56.49	78.65
Cluster-Chr08-2	GH_A08G1535	0.09	0.05	6.57	5.01	6.74	4.94	0.4	0.25	0.12	0.06
Cluster-Chr08-2	GH_A08G1536	0	0.08	0.46	0.66	0.73	1.56	0.19	6.27	0	1.01
Cluster-Chr08-2	GH_A08G1538	0	0.18	0	0	0	0	0.04	1.31	0	1.94
Cluster-Chr08-2	GH_A08G1539	7.28	7.75	3.04	2.92	2.17	1.31	2.32	1.35	3.46	0.59
Cluster-Chr08-2	GH_A08G1540	14.5	8.82	1.27	1.64	0.51	0.05	0.6	0.11	0.12	0.29
Cluster-Chr08-2	GH_A08G1542	2.05	2.8	5.84	3.91	2.76	3.29	2.43	7.29	2.65	2.45
Cluster-Chr08-2	GH_A08G1543	38.99	31.85	29.21	30.46	29.02	38.55	23.21	36.78	24.63	23.51
Cluster-Chr08-2	GH_A08G1544	3.83	3.48	1.99	1.31	0.34	0.53	0.5	0.52	1.7	0.26
Cluster-Chr08-2	GH_A08G1545	23.18	8.1	2.87	1.42	0.58	0.03	0.53	0.03	1.5	0.27
Cluster-Chr08-2	GH_A08G1546	0	0	0.01	0.01	0.03	0.02	0.43	1.09	7.47	0.79
Cluster-Chr08-2	GH_A08G1547	10.29	12.63	14.78	14.74	12.25	13.67	16.55	17.04	9.76	13.2
Cluster-Chr08-2	GH_A08G1550	6.55	8.91	2.27	2.9	1.55	2.75	1.79	6.53	1.46	5.74
Cluster-Chr08-2	GH_A08G1552	11.59	18.41	5.22	6.53	2.84	4.74	2.79	2.9	1.37	1.29
Cluster-Chr08-2	GH_A08G1553	1.46	2.1	0.95	2.97	0.41	1.94	1.22	3.54	3.18	3.34
Cluster-Chr08-2	GH_A08G1554	6.41	7.12	1.94	1.67	1.19	1.32	2.11	1.79	3.1	1.08
Cluster-Chr08-2	GH_A08G1556	1.94	3.73	2.67	0.99	3.13	1.08	1.51	0.46	1.5	0.75
Cluster-Chr08-2	GH_A08G1557	1.94	4.82	0.47	4.63	0.27	3.76	0.52	2.01	0.4	3.95
Cluster-Chr08-2	GH_A08G1559	9.87	8.26	2.16	1.19	0.53	0.22	0.2	0.57	1.69	0.16
Cluster-Chr08-2	GH_A08G1560	17.55	13.32	2.22	1.49	0.66	0.72	0.5	0.57	1.39	1.11
Cluster-Chr08-2	GH_A08G1561	14.3	14.94	15.55	16.63	17.24	21.77	21.63	27.51	21.6	23.96
Cluster-Chr08-2	GH_A08G1562	1.3	1.27	1.16	0.6	0.51	0.54	0.82	0.54	0.78	1.05
Cluster-Chr08-2	GH_A08G1564	10.39	14.95	19.51	31.23	9.27	26.97	9.08	18.64	7.95	13.58
Cluster-Chr08-2	GH_A08G1565	5	2.39	0.69	0.22	0.17	0	0	0	0.03	0
Cluster-Chr08-2	GH_A08G1567	0	0.05	0.85	0.94	2.56	2.64	2.62	2.81	2.46	1.73
Cluster-Chr08-2	GH_A08G1568	11.81	13.7	12.6	12.79	13.21	15.25	18.29	8.78	8.12	3.21
Cluster-Chr08-2	GH_A08G1569	92.02	114.97	12.97	18.63	1.59	2.29	1.19	2.1	8.26	4.83
Cluster-Chr08-2	GH_A08G1570	6.2	0.57	1.87	0.1	1.08	0.28	0.78	0	0.74	0
Cluster-Chr08-2	GH_A08G1571	10.6	11.26	6.28	6.46	2.78	3.31	2.99	1.22	1.69	2.11
Cluster-Chr08-2	GH_A08G1572	2.11	0.92	2.38	1.28	3.9	4	5.3	0.62	2.69	3.36
Cluster-Chr08-2	GH_A08G1573	20.9	14.3	3.45	2.65	3.76	1.73	1.01	0.67	0.66	0.52
Cluster-Chr08-2	GH_A08G1574	10.44	9.35	6.57	7.82	9.32	10.32	6.02	8.67	4.56	2.78
Cluster-Chr08-2	GH_A08G1575	16.22	14.84	6.71	4.67	3.22	2.52	2.83	2.2	2.8	1.48
Cluster-Chr08-2	GH_A08G1577	17.96	24.18	17.04	15.74	7.08	9.39	8.09	6.73	11.14	7.81
Cluster-Chr08-2	GH_A08G1578	11.79	9.43	6.73	6.25	5.42	4.07	6.08	2.7	4.53	3.04
Cluster-Chr08-2	GH_A08G1579	2.93	3.09	38.75	3.7	15.38	2.25	1.37	0.15	0.52	0.16
Cluster-Chr08-2	GH_A08G1580	2.88	5.59	3.73	3.65	2.56	2.97	2.17	1.11	2.11	0.65
Cluster-Chr08-2	GH_A08G1581	0.87	1.2	0	0.2	0	0.04	0	0	0	0
Cluster-Chr08-2	GH_A08G1584	1.88	1.82	4.19	0.57	1.37	0.11	0.31	0.06	0.4	0.11
Cluster-Chr08-2	GH_A08G1585	14.13	8.33	14.35	8.61	12.52	9.69	11.33	7.01	9.82	3.1
Cluster-Chr08-2	GH_A08G1586	5.69	4.52	4.51	4.77	2.96	3.71	1.41	2.31	2.11	1.36
Cluster-Chr08-2	GH_A08G1587	4.64	5.52	5.05	3.93	8.48	9.96	9.11	6.54	6.29	5.67
Cluster-Chr08-2	GH_A08G1588	13.51	12.05	16.42	15.95	20.37	19.13	26.57	20.86	19.3	17.23
Cluster-Chr08-2	GH_A08G1589	8.09	8.6	7.88	10.53	13.88	10.7	16.17	8.65	13.54	9.07
Cluster-Chr08-2	GH_A08G1590	7.53	3.99	4.02	1.75	4.04	1.37	2.06	0.43	3.83	1.49
Cluster-Chr08-2	GH_A08G1591	2.13	1.94	1.25	0.85	1.4	0.79	0.88	0.15	0.78	0.26
Cluster-Chr08-2	GH_A08G1592	4.14	2.64	0.91	0.83	1.84	0.69	1.39	0.69	1.23	0.53
Cluster-Chr08-2	GH_A08G1593	1.13	2.69	0.32	0.44	0.1	0.25	0	0.34	0	0.33
Cluster-Chr08-2	GH_A08G1594	8.85	6.05	1.63	1.77	0.5	0.32	0.75	0.52	1.31	0.55
Cluster-Chr08-2	GH_A08G1595	4.12	5.86	0.89	2.7	0.78	1.78	0.6	1.62	0.63	2.33
Cluster-Chr08-2	GH_A08G1597	8.9	0.96	4.83	0.66	1.36	0.65	1.49	0.27	1.54	0.13
Cluster-Chr08-2	GH_A08G1598	30.3	17	14.82	11.33	7.38	5.71	5.54	3.3	5.38	4.66
Cluster-Chr08-2	GH_A08G1600	3.99	5.52	0.74	1.2	0.26	0.35	0.13	0.39	0.31	0.25
Cluster-Chr08-2	GH_A08G1601	10.06	10.73	15.6	16.66	12.87	9.41	13.56	10.31	10.08	6.77
Cluster-Chr08-2	GH_A08G1602	15.24	20.24	3.47	3.88	0.89	1.38	0.81	1.03	1.78	0.75
Cluster-Chr08-2	GH_A08G1603	0.26	0.18	1.85	1.21	0.16	0.11	0.4	0.12	0.67	0.1
Cluster-Chr08-2	GH_A08G1604	6.48	6.52	0.89	1.28	0.1	0.17	0.13	0.01	0.09	0.02
Cluster-Chr08-2	GH_A08G1605	15.52	9.23	3.94	4.53	3.72	2.42	1.98	2.25	2.89	1.8
Cluster-Chr08-2	GH_A08G1606	2.78	2.69	0.67	0.49	0.1	0.24	0.17	0.28	0.23	0.29
Cluster-Chr08-2	GH_A08G1607	20.61	17.5	6.48	3.21	0.71	0.25	0.22	0.23	0.63	0.26
Cluster-Chr08-2	GH_A08G1609	4.16	4.1	5.18	3.95	4.34	5.58	3.03	1.65	2.08	2.15
Cluster-Chr08-2	GH_A08G1610	0.09	0.04	1.48	2.07	3.52	5.18	3.05	3.68	1.74	0.99
Cluster-Chr08-2	GH_A08G1613	23.67	22.13	2.63	3.71	0.23	0.33	0.34	0.15	0.52	0.24
Cluster-Chr08-2	GH_A08G1614	87.28	58.52	39.3	41.29	38.61	35.76	37.81	25.61	28.27	29.99
Cluster-Chr08-2	GH_A08G1615	16.4	17.93	12.69	12.68	9.74	8.81	9.08	7.87	9.81	6.21
Cluster-Chr08-2	GH_A08G1616	1.91	2.39	4.76	3.41	5.15	4.56	5.02	3.29	5.28	2.53
Cluster-Chr08-2	GH_A08G1617	4.87	3.01	2.51	1.2	1.85	1.06	1.08	0.48	0.53	0.2
Cluster-Chr08-2	GH_A08G1618	4.4	4.15	1.13	0.9	0.41	0.49	0.3	0.21	0.64	0.39
Cluster-Chr08-2	GH_A08G1620	21.56	22.69	8.45	8.53	4.38	5.68	4.11	3.03	5.35	2.83
Cluster-Chr08-2	GH_A08G1626	5.83	9.94	0.31	2.23	0.05	0.05	0	0	0	0.03
Cluster-Chr08-2	GH_A08G1628	5.19	4.85	4.73	4.23	3.68	4.76	14.48	14.66	42.77	29.91
Cluster-Chr08-2	GH_A08G1632	1.89	1.41	0.62	0.53	1.23	0.89	0.5	0	0.19	0.06
Cluster-Chr08-2	GH_A08G1635	0.13	0.26	5.88	7.52	71.17	68.91	307.19	264.23	295.31	283.81
Cluster-Chr08-2	GH_A08G1636	8.48	11.75	2.89	3.13	1.1	1.76	2.74	7.98	6.51	2.42
Cluster-Chr08-2	GH_A08G1637	7.9	7.56	6.31	7.29	6.35	12.01	7.2	10.09	5.02	13.51
Cluster-Chr08-2	GH_A08G1638	1.39	0.56	0.57	0.19	0.05	0.08	0.13	0	0.03	0
Cluster-Chr08-2	GH_A08G1640	0.9	1.2	3.98	3.26	15.15	11.37	29.64	15.11	24.96	9.98
Cluster-Chr08-2	GH_A08G1641	6.71	15.29	3.31	6.38	1.98	8.27	2.52	4.57	0.99	1.78
Cluster-Chr08-2	GH_A08G1642	8.29	8.9	3.28	3.06	2.08	1.94	2.14	2.14	3.5	1.59
Cluster-Chr08-2	GH_A08G1643	1.54	1.45	0.43	0.37	0.33	0.4	0.56	0.52	1.42	1.12
Cluster-Chr08-2	GH_A08G1644	18.34	13.49	11.46	9.86	7.77	8.7	7.64	5.92	6.05	3.75
Cluster-Chr08-2	GH_A08G1645	19.35	14.15	16.59	11.85	21.37	14.1	17.9	13.63	12.19	11.28
Cluster-Chr08-2	GH_A08G1649	10.16	10.31	9.59	11.01	9.59	13.11	26.1	28.67	64.8	32.4
Cluster-Chr08-2	GH_A08G1650	15.54	13.28	13.62	20.01	11.35	17.34	14.76	21	20.06	27.59
Cluster-Chr08-2	GH_A08G1652	14.1	8.39	1.83	4.86	0.8	1	0.37	0.33	1.5	0.51
Cluster-Chr08-2	GH_A08G1653	14.88	10.15	5.1	2.93	3.68	1.43	3.76	1.98	4.48	1.62
Cluster-Chr08-2	GH_A08G1654	10.61	13.5	9.27	12.42	12.17	17.48	18.29	28.35	13.43	20.93
Cluster-Chr08-2	GH_A08G1655	74.59	81.96	30.77	43.09	13.8	23.11	16.3	18	25.78	30.01
Cluster-Chr08-2	GH_A08G1656	14.39	9.9	26.45	22.73	23.23	22.5	38.44	44.53	34.77	41.94
Cluster-Chr08-2	GH_A08G1657	8.66	8.12	2.81	3.1	0.35	0.94	0.67	0.69	2.89	2.47
Cluster-Chr08-2	GH_A08G1659	64.51	48	16.36	15.22	7.96	3.78	8.93	2.6	7.51	5.76
Cluster-Chr08-2	GH_A08G1661	7.78	9.02	5.24	4.41	3.5	4.21	3.92	3.45	3.27	2.58
Cluster-Chr08-2	GH_A08G1662	0.09	0.58	0.07	0.49	0	0.13	0.19	0.08	0.08	6.86
Cluster-Chr08-2	GH_A08G1663	43.36	48.98	15.52	17.63	10.32	13.03	7.88	7.54	9.36	6.93
Cluster-Chr08-2	GH_A08G1664	3.08	3.89	0.66	2.73	0.28	1.12	0.04	0.4	0.08	0.24
Cluster-Chr08-2	GH_A08G1665	9.79	16.57	3.49	4.79	2.69	4.56	3.56	5.15	3.05	3.39
Cluster-Chr08-2	GH_A08G1666	12.6	7.73	4.19	2.65	2.66	1.67	2.26	0.79	4.04	2.53
Cluster-Chr08-2	GH_A08G1667	34.65	26.73	35.05	40.04	31.42	44.78	44.12	29.84	27.08	29.73
Cluster-Chr08-2	GH_A08G1668	7.27	5.96	13.84	12.47	12.31	13.05	22.17	25.8	20.94	19.18
Cluster-Chr08-2	GH_A08G1669	13.15	12.3	12.01	12.02	7.67	9.42	8.09	10.16	7.38	6.2
Cluster-Chr08-2	GH_A08G1670	10.42	7.39	11.88	8.26	8.88	8.18	10.04	7.61	9.1	6.4
Cluster-Chr08-2	GH_A08G1671	1.81	1.96	0.67	0.5	0.44	1.16	0.45	1.06	0.95	0.62
Cluster-Chr08-2	GH_A08G1672	42.59	39.89	20.33	15.17	5.85	12.56	18.53	19.57	14.58	20.12
Cluster-Chr08-2	GH_A08G1674	0.79	0.06	0.78	0.07	4.18	0.79	11.87	5.56	13.67	9.62
Cluster-Chr08-2	GH_A08G1675	9.82	6.45	8.22	2.74	7.17	1.74	6.04	3.11	4.22	4.11
Cluster-Chr08-2	GH_A08G1676	2.69	3.12	2.5	2.06	4.35	3.9	17.48	17.19	5.69	5.54
Cluster-Chr08-2	GH_A08G1677	11.11	10.74	25.82	23.03	27.23	25.36	21.8	19.03	11.88	9.53
Cluster-Chr08-2	GH_A08G1678	0.75	1.49	0.34	0.27	0.15	0.17	0.19	0.42	0.2	0.47
Cluster-Chr08-2	GH_A08G1680	0.61	0.45	2.2	1.27	6.79	5.05	32.04	38.8	42.03	16.02
Cluster-Chr08-2	GH_A08G1681	0.28	0.13	10.22	0.6	18.03	1.4	20.51	3	28.76	2.29
Cluster-Chr08-2	GH_A08G1687	0.91	1.78	0.24	0.27	0.13	0.18	0.11	0.02	0.14	0.07
Cluster-Chr08-2	GH_A08G1688	3.73	5.42	1.45	1.77	0.71	0.85	0.53	0.48	0.87	0.5
Cluster-Chr08-2	GH_A08G1689	5.91	0	1.46	0	0.52	0	0.8	0	1.06	0.19
Cluster-Chr08-2	GH_A08G1692	16.51	17.19	4.62	6.92	5.06	6.36	19.41	21.51	25.85	16.83
Cluster-Chr08-2	GH_A08G1694	13.61	10.97	16.72	9.16	10.38	6.42	8.09	3.13	6.18	4.29
Cluster-Chr08-2	GH_A08G1695	3.56	3.88	5.57	3.03	7.09	3.16	7.16	5.98	3.62	3.48
Cluster-Chr08-2	GH_A08G1696	11.71	9.27	6.01	5.4	3.95	5.26	3.59	2.02	1.62	0.75
Cluster-Chr08-2	GH_A08G1697	2.06	4.65	0.65	1.1	0.48	0.5	0.67	0.41	1.18	0.58
Cluster-Chr08-2	GH_A08G1699	32.75	42.45	4.43	12.01	0.27	1.08	0.08	0.18	0.17	0.02
Cluster-Chr08-2	GH_A08G1700	26.58	29.27	11.57	10.41	6.06	5.88	7.28	6.99	7.39	3.72
Cluster-Chr08-2	GH_A08G1701	0.85	0.2	0.39	0.06	0.38	0.65	1.63	0.7	0.98	1.57
Cluster-Chr08-2	GH_A08G1702	22.83	24.4	6.32	6.11	2.84	2.77	2.14	2.07	3.84	2.06
Cluster-Chr08-2	GH_A08G1703	2.57	3.95	1.72	2.72	0.82	1.14	1.12	0.32	0.69	0.49
Cluster-Chr08-2	GH_A08G1704	11.51	11.36	9	11.04	7.23	14.25	4.9	4.47	3.66	5.54
Cluster-Chr08-2	GH_A08G1706	6.89	8.18	5.19	5.73	4.06	4.81	3.43	4.22	3.32	2.94
Cluster-Chr08-2	GH_A08G1707	17.39	16.63	10.69	10.6	7.62	8.81	7.85	7.84	8.29	7.92
Cluster-Chr08-2	GH_A08G1708	8.55	10.28	13.05	8.29	14.5	15.47	25.4	39.09	26.65	26.16
Cluster-Chr08-2	GH_A08G1709	6.44	6.77	3.04	2.94	1.72	2.86	1.36	1.1	1.03	0.96
Cluster-Chr08-2	GH_A08G1710	42.25	38.38	104.86	122.48	117.11	155.5	190.4	257.39	92.37	52.32
Cluster-Chr08-2	GH_A08G1712	0.95	0.75	1.57	0.52	0.46	0.11	0.05	0.09	0.22	0
Cluster-Chr08-2	GH_A08G1713	0	0	0.07	0	0.04	0.36	0.4	3.29	0.18	0.18
Cluster-Chr08-2	GH_A08G1714	20.57	31.74	3.97	4.67	3.63	3.74	1.62	0.99	0.51	0.46
Cluster-Chr08-2	GH_A08G1718	21.75	19.48	28.74	27.49	31.05	26.68	25.15	19.97	10.19	8.6
Cluster-Chr08-2	GH_A08G1719	7.67	7.35	3.45	2.47	1.52	1.61	0.98	0.58	1.76	0.75
Cluster-Chr08-2	GH_A08G1720	3.92	5.81	1.39	1.94	0.77	0.83	0.64	0.89	1.55	1.41
Cluster-Chr08-2	GH_A08G1722	3.4	2.98	8.49	8.29	13.7	11.81	15.89	16.4	13.03	10.66
Cluster-Chr08-2	GH_A08G1724	22.1	26.47	30.31	31.81	19.27	29.35	18.91	12.98	13.01	9.08
Cluster-Chr08-2	GH_A08G1726	18.88	14.33	15.76	9	21.16	12.97	5.91	4.53	5.09	3.49
Cluster-Chr08-2	GH_A08G1727	9.47	14.27	3.83	5.55	2.44	3.99	1.36	1.57	1.43	0.9
Cluster-Chr08-2	GH_A08G1728	11.84	13.08	6.83	5.5	5.99	6.66	5.81	5.18	5.76	4.17
Cluster-Chr08-2	GH_A08G1729	23.74	23.56	17.22	17.02	12.29	13	12.32	8.92	11.03	7.11
Cluster-Chr08-2	GH_A08G1731	2.46	3.68	1.26	1.57	1.04	4.53	1.76	1.46	1.49	4.93
Cluster-Chr08-2	GH_A08G1732	20.03	23.1	21.75	22.15	14.92	17.65	19.27	22.99	15.51	12.28
Cluster-Chr08-2	GH_A08G1733	14.72	15.5	4.46	4.34	2.21	2.92	2.59	2.35	5.51	2.44
Cluster-Chr08-2	GH_A08G1734	30.2	11.3	24.85	12.82	22.93	11.99	27.88	10.65	21.2	8.42
Cluster-Chr08-2	GH_A08G1738	0.95	1.5	2.03	1.22	0.75	1.54	0.96	2.45	5.82	1.84
Cluster-Chr08-2	GH_A08G1739	2.54	4.26	1.45	1.52	1.35	1.57	1.76	1.66	1.23	1
Cluster-Chr08-2	GH_A08G1740	27.59	33.41	37.65	38.8	43.82	44.53	30.64	31.46	16.81	7.89
Cluster-Chr08-2	GH_A08G1741	17.86	34.86	13.87	13.64	10.85	7.54	0.59	0.34	0.24	0.13
Cluster-Chr08-2	GH_A08G1742	1.77	1.5	8.2	3.11	11.72	8.06	9.32	5.21	3.11	5.09
Cluster-Chr08-2	GH_A08G1744	0	0.05	0	0.04	1.01	0.7	11.3	2.35	16.53	1.57
Cluster-Chr08-2	GH_A08G1745	6.38	6.59	12.83	11.18	11.43	11.62	10.96	11.25	8.91	5.75
Cluster-Chr08-2	GH_A08G1746	0.82	1.08	0.69	0.61	0.13	0.43	0.83	0.58	7.04	0.45
Cluster-Chr08-2	GH_A08G1748	22.69	10.35	14.52	9.58	14.36	10.07	10.35	5.81	9.12	3.12
Cluster-Chr08-2	GH_A08G1749	34.67	33.34	33.85	35.13	33.86	33.26	37.71	21.88	19.68	12.3
Cluster-Chr12-1	GH_A12G2288	2.18	0.29	0.86	0.06	8.43	0.29	4.4	6.41	1.52	0.61
Cluster-Chr12-1	GH_A12G2289	32.66	32.55	22.43	13.9	11.13	10.83	10.73	7.54	9.41	6.57
Cluster-Chr12-1	GH_A12G2292	0.78	1.67	0.16	0.29	0.05	0	2.22	7.76	0.94	6.11
Cluster-Chr12-1	GH_A12G2293	8.77	13.28	1.96	2.37	1.25	1.18	4.71	10.86	2.75	1.89
Cluster-Chr12-1	GH_A12G2294	15.87	16.72	9.77	7.63	4.36	4.62	2.7	3.71	4.5	2.95
Cluster-Chr12-1	GH_A12G2295	2.19	2.96	0.54	0.14	0.05	0.23	0.39	0.21	4.45	6.93
Cluster-Chr12-1	GH_A12G2296	5.77	5.32	7.96	9.9	8.94	11.78	8.73	8.84	4.89	5.5
Cluster-Chr12-1	GH_A12G2297	12.78	14.46	20.85	24.05	19.57	22.84	17.68	17.9	12.57	10.13
Cluster-Chr12-1	GH_A12G2298	1.27	1.35	8.91	0.26	20.76	0.74	9.13	0.1	0.9	0.25
Cluster-Chr12-1	GH_A12G2299	0.05	0.16	5.12	0.47	3.65	3	6.76	6.51	1.94	11.75
Cluster-Chr12-1	GH_A12G2300	1.9	2.1	0.4	0.49	0.02	0.01	0.04	0.04	0.18	0.04
Cluster-Chr12-1	GH_A12G2301	10.02	11.81	5.08	4.97	2.58	3.55	1.45	0.88	1.43	1.07
Cluster-Chr12-1	GH_A12G2302	4.87	7.46	4.09	3.29	3.43	3.09	2.86	3.53	1.09	2.2
Cluster-Chr12-1	GH_A12G2304	2.71	2.74	2.7	2.16	1.06	1.99	1.44	1.68	1.05	0.51
Cluster-Chr12-1	GH_A12G2307	5.32	4	1.85	2.24	1.51	1.39	0.67	0.64	1.45	0.2
Cluster-Chr12-1	GH_A12G2311	0.04	0.1	0.05	0.02	0.02	0.07	2.99	10.33	5.12	7.01
Cluster-Chr12-1	GH_A12G2312	3.45	13.02	0.62	1.61	0.17	0.77	0.5	0.73	3.16	1.11
Cluster-Chr12-1	GH_A12G2313	9.87	10.22	8.46	12.27	7.89	9.58	9.44	11.05	11.4	11.94
Cluster-Chr12-1	GH_A12G2315	26.22	21.73	75.44	69.16	57.13	49.84	41.58	28.91	24.47	21.33
Cluster-Chr12-1	GH_A12G2319	7.29	5.49	19.24	18.21	19.74	21.36	17.39	15.2	12.08	12.89
Cluster-Chr12-1	GH_A12G2320	15.64	19.67	2.21	3.65	0.19	0.43	0.23	0.25	0.41	1.74
Cluster-Chr12-1	GH_A12G2322	5.11	4.78	7.48	8.16	7.51	9.29	5.17	4.69	4.54	2.81
Cluster-Chr12-1	GH_A12G2323	29.57	28.07	75.91	92.72	69.79	84.35	88.98	106.13	85	93.61
Cluster-Chr12-1	GH_A12G2324	73.29	50.23	6.09	9.39	2.32	3.81	2.82	3.65	4.99	2.79
Cluster-Chr12-1	GH_A12G2325	3.54	1.48	0.33	0.13	0.99	0.47	0.92	0.09	0.63	0.05
Cluster-Chr12-1	GH_A12G2326	9.1	7.25	32.07	31.68	41.61	51.3	44.49	37.34	35.61	33.93
Cluster-Chr12-1	GH_A12G2327	4.84	0.86	1.13	0.63	0.04	0.13	0.08	0.01	0.19	0.19
Cluster-Chr12-1	GH_A12G2328	0.02	3.69	0	4.62	0.04	4.18	0.08	8.63	0.08	3.58
Cluster-Chr12-1	GH_A12G2329	23.2	22.86	15.94	14.93	9.39	14.5	8.85	11.66	9.61	11.34
Cluster-Chr12-1	GH_A12G2331	9.56	11.39	6.66	7.02	6.17	4.51	4.41	4.44	4.62	2.41
Cluster-Chr12-1	GH_A12G2332	1.13	0.7	0.23	0.39	0.04	0.14	0.05	0.13	0.2	0.2
Cluster-Chr12-1	GH_A12G2333	17.32	16.77	10.81	14.33	5.94	10.9	5.32	4.58	2.97	3.84
Cluster-Chr12-1	GH_A12G2334	0.19	5.39	0.07	2.64	0.11	2.53	0.17	3.85	0.37	1.37
Cluster-Chr12-1	GH_A12G2336	10.86	19.18	4.4	4.07	0.93	1.82	0.84	1.49	0.56	0.74
Cluster-Chr12-1	GH_A12G2338	17.13	14.15	7.43	6.38	3.32	3.59	4.2	2.94	5.04	3.65
Cluster-Chr12-1	GH_A12G2339	27.39	78.51	5.25	8.88	0.28	0.33	0.19	0.18	0.26	0.12
Cluster-Chr12-1	GH_A12G2340	5.9	1.12	0.7	0.19	0.15	0.06	0.31	0.09	0.29	0.08
Cluster-Chr12-1	GH_A12G2341	13.24	15.23	13.21	10.86	16.23	11.88	15.6	9.29	25.63	12.08
Cluster-Chr12-1	GH_A12G2342	8.77	6.48	6.77	6.83	7.78	8.19	11.15	9.6	9.36	8.4
Cluster-Chr12-1	GH_A12G2343	7.23	9.75	16.55	14.8	23.95	27.92	42.7	54.77	50.11	55.82
Cluster-Chr12-1	GH_A12G2344	1.41	2.04	0.44	0.22	0.03	0.06	0.42	0.42	0.77	0.44
Cluster-Chr12-1	GH_A12G2346	14.43	14.47	7.71	10.8	7.67	11.54	10.91	8.85	8.7	9.29
Cluster-Chr12-1	GH_A12G2348	18.07	15.05	7.48	4.63	5.52	3.85	6.99	3.36	4.81	3.89
Cluster-Chr12-1	GH_A12G2349	1.6	1.84	1.33	0.46	0.32	0.59	0.44	1.79	1.12	4.19
Cluster-Chr12-1	GH_A12G2350	0.74	0.47	0.61	0.47	1.09	0.53	1.06	0.76	0.37	0.35
Cluster-Chr12-1	GH_A12G2351	2.19	0.95	0.42	0.65	1.14	1.92	0.92	0.9	1.61	1.67
Cluster-Chr12-1	GH_A12G2353	2.26	1.3	1.47	0.24	1.59	0.03	0.98	0.47	1.56	0.07
Cluster-Chr12-1	GH_A12G2354	18.88	22.93	29.59	35.65	27.88	32.92	25.81	21.81	21.67	15.56
Cluster-Chr12-1	GH_A12G2355	0.9	1.45	2.09	4.74	9.34	15	0.95	0.38	1.69	0.31
Cluster-Chr12-1	GH_A12G2356	49.73	33.62	9.83	8.22	3.48	0.53	2.43	1.01	4.2	0.92
Cluster-Chr12-1	GH_A12G2357	2.85	2.48	0.74	0.62	0.06	0.23	0.12	0.04	0.12	0
Cluster-Chr12-1	GH_A12G2358	15.44	18.59	7.21	7.57	2.99	4.2	2.26	2.5	2.15	1.62
Cluster-Chr12-1	GH_A12G2359	14.61	13.12	8.04	5.92	3.42	2.56	1.61	0.96	1.85	1.13
Cluster-Chr12-1	GH_A12G2360	33.4	36.32	41.49	30.14	25.64	22.63	27.41	37.29	19.36	28.82
Cluster-Chr12-1	GH_A12G2361	7.42	9.36	8.17	7.18	7.93	9.19	6.92	7.9	6.97	10.63
Cluster-Chr12-1	GH_A12G2362	21.71	23.46	12.55	10.66	5.61	7.49	6.84	8.64	7.55	10.06
Cluster-Chr12-1	GH_A12G2363	6.93	9.05	2.8	2.97	2	1.8	1.92	1.76	3.93	1.9
Cluster-Chr12-1	GH_A12G2365	3.97	3.44	0.88	0.59	0.28	0.14	0.31	0.06	0.48	0.09
Cluster-Chr12-1	GH_A12G2366	18.28	29.17	3.31	3.09	0.59	0.55	1.01	0.2	2.03	0.16
Cluster-Chr12-1	GH_A12G2367	33.42	31.32	8.83	7.72	3.11	2.56	2.85	2.17	3.93	1.97
Cluster-Chr12-1	GH_A12G2368	30.92	15.31	7.43	3.68	3.43	0.95	1.86	0.33	2.85	0.43
Cluster-Chr12-1	GH_A12G2371	0.13	0.07	4.2	2.31	4.3	2.87	1.13	0.86	1.02	0.95
Cluster-Chr12-1	GH_A12G2372	2	3.13	0.4	1.79	2.5	4.12	2.66	6.5	2.95	1.16
Cluster-Chr12-1	GH_A12G2373	6.31	6.98	10.65	8.4	20.36	13.34	28.94	34	25.96	26.01
Cluster-Chr12-1	GH_A12G2375	0.17	0.3	0.79	2.43	20.06	33.55	21.48	36.95	5.39	4.5
Cluster-Chr12-1	GH_A12G2378	11.49	12.19	14.32	9.77	17.13	9.65	15.92	5.13	13.98	15.21
Cluster-Chr12-1	GH_A12G2380	11.66	9.73	4.82	3.93	3.4	2.7	3.38	2.37	4.57	3.76
Cluster-Chr12-1	GH_A12G2381	2.56	3.59	1.1	1.04	0.33	0.27	0.23	0.08	0.54	0.09
Cluster-Chr12-1	GH_A12G2382	0.16	0.13	0.62	0.5	0.24	0.48	12.65	8.2	31.62	10.36
Cluster-Chr12-1	GH_A12G2388	6.33	13.59	0.85	2.53	0.9	2.05	0	0.07	0.15	0
Cluster-Chr12-1	GH_A12G2389	7.32	3.56	17.37	2.86	3.76	0.51	0.49	0.02	0.22	0.07
Cluster-Chr12-1	GH_A12G2390	1.37	2.02	0.88	1.37	2.88	1.64	25.06	83.5	21.81	11.95
Cluster-Chr12-1	GH_A12G2393	2.29	3.63	3.2	7.67	1.44	0.66	0.03	0.02	0	0
Cluster-Chr12-1	GH_A12G2394	24.45	27.42	12.95	15.9	12.33	14.05	5.35	4.66	3.03	1.39
Cluster-Chr12-1	GH_A12G2395	36.02	55.97	7.67	8.39	3.96	4.13	3.72	1.6	2.31	1.1
Cluster-Chr12-1	GH_A12G2396	13.38	5.76	1.63	0.89	2.36	0.6	5.21	0.93	30.72	7.84
Cluster-Chr12-1	GH_A12G2397	104.8	86.97	35.49	37.5	1.36	1.94	1.62	2.3	9.6	4.34
Cluster-Chr12-1	GH_A12G2399	24.74	22.83	40.75	38.98	39.51	60.4	54.31	63.34	36.3	55.78
Cluster-Chr12-1	GH_A12G2404	6.6	4.93	6.45	5.59	3.41	4.7	2.08	3.13	2.33	1.51
Cluster-Chr12-1	GH_A12G2406	8.23	9.21	1.71	2.48	1.97	2.8	0.64	0.89	1.21	1.09
Cluster-Chr12-1	GH_A12G2409	0.36	0.89	1.46	1.05	0.13	0.19	0.04	0	0	0
Cluster-Chr12-1	GH_A12G2411	1.2	0.06	0.13	0.31	0.17	0.11	0.52	0.95	3.6	1.49
Cluster-Chr12-1	GH_A12G2412	7.11	8.25	7.79	8.08	5.94	6.98	4.52	5.46	3.56	3.95
Cluster-Chr12-1	GH_A12G2414	11.75	14.44	5.02	4.6	5.9	4.55	5.18	4	7.55	3.33
Cluster-Chr12-1	GH_A12G2415	29.33	25.02	73.41	62.21	70.78	63.67	57.59	112.64	50.35	86.85
Cluster-Chr12-1	GH_A12G2416	1.12	0.78	0.28	0.25	0.1	0.14	0.12	0.64	0.43	0.08
Cluster-Chr12-1	GH_A12G2417	5.94	6.41	3.44	2.55	1.02	0.96	0.79	0.42	1.38	0.49
Cluster-Chr12-1	GH_A12G2419	52.34	48.51	18.45	14.11	33.81	27.67	38.04	44.68	21.52	8.27
Cluster-Chr12-1	GH_A12G2420	12.47	12.78	11.3	12.03	8.85	11.29	7.17	6.08	6.5	6.64
Cluster-Chr12-1	GH_A12G2421	18.29	15.9	3.65	3.84	2.87	3.03	0.99	0.65	1.12	0.86
Cluster-Chr12-1	GH_A12G2422	10.53	12.41	2.76	3.31	0.8	0.8	1.94	0.38	0.86	1.31
Cluster-Chr12-1	GH_A12G2423	3.13	2.46	2.75	1.68	2.95	0.81	2.4	0.7	2.05	0.54
Cluster-Chr12-1	GH_A12G2424	3.4	2.39	1.3	1	0.07	0.04	0.04	0.08	0.09	0.59
Cluster-Chr12-1	GH_A12G2425	3.05	5.11	2.08	3.17	1.51	2.79	1.82	2.07	1.9	1.09
Cluster-Chr12-1	GH_A12G2426	32.22	33.42	20.77	25.36	15.66	20.91	17.04	13.21	10.09	9.46
Cluster-Chr12-1	GH_A12G2427	0.03	0.06	0.56	0.43	0.12	0	0.16	0.55	1.08	1.51
Cluster-Chr12-1	GH_A12G2428	9.37	6.67	6.26	1.72	8.52	2.5	15.24	7.37	24.47	2.82
Cluster-Chr12-1	GH_A12G2429	20.91	24.19	20.92	15.95	17.31	19.53	25.06	31.86	18.88	20.77
Cluster-Chr12-1	GH_A12G2431	5.91	4.88	4.13	3.22	5.84	4.29	2.98	3.24	2.1	0.87
Cluster-Chr12-1	GH_A12G2432	15.28	18.61	12.98	23.1	8.28	18.23	17.68	17.17	12.74	20
Cluster-Chr12-1	GH_A12G2433	17.21	17.34	11.27	15.93	15.52	26.8	18.5	35.31	20.83	21.69
Cluster-Chr12-1	GH_A12G2434	0.62	1.21	0.13	0.17	0	0.03	0	0.05	0.19	0.52
Cluster-Chr12-1	GH_A12G2435	12.37	11.38	1.86	2.06	0.36	0.26	0.27	0.33	1	0.56
Cluster-Chr12-1	GH_A12G2437	6.58	8.64	66.48	88.34	60.75	52.99	51.43	146.9	80.38	157.42
Cluster-Chr12-1	GH_A12G2438	11.62	10.87	37.04	14.51	5.97	3.26	0.4	0.22	0.21	0.04
Cluster-Chr12-1	GH_A12G2439	10.7	11.41	6.69	5.31	2.92	3.06	2.97	2.08	2.94	1.59
Cluster-Chr12-1	GH_A12G2441	0.17	1.4	0.04	0.91	0	3.31	0	0.78	0.02	0.07
Cluster-Chr12-1	GH_A12G2442	2	1.78	0.15	0.31	0	0.04	0	0	0	0.02
Cluster-Chr12-1	GH_A12G2443	0.8	0.11	0.38	0.19	0.1	0.07	0.09	2.58	1.12	5.67
Cluster-Chr12-1	GH_A12G2445	0.04	0	0	0.05	0.13	0.25	7.56	34.93	13.36	10.59
Cluster-Chr12-1	GH_A12G2446	16.83	15.19	23.02	25.14	16.18	19.96	16.15	11.85	6.2	8.18
Cluster-Chr12-1	GH_A12G2447	6.13	7.69	5.01	3.6	1.82	1.78	0.55	0.4	0.26	0.22
Cluster-Chr12-1	GH_A12G2448	13.94	8.88	4.99	3.7	4.21	2.33	2.84	0.81	1.37	0.68
Cluster-Chr12-1	GH_A12G2451	1.86	0.04	2.21	0.01	1.9	0	1.38	0	1.05	0
Cluster-Chr12-1	GH_A12G2455	0.02	0.02	0	0.01	0.06	0	0.07	0.01	2.08	9.75
Cluster-Chr12-1	GH_A12G2456	18.72	28.06	1.87	2.46	0.06	0.06	0.05	0.06	0.13	0.04
Cluster-Chr12-1	GH_A12G2457	15.41	13.83	13.57	12.14	10.86	13.38	8.35	9.41	8.43	8.25
Cluster-Chr12-1	GH_A12G2461	0.44	3.87	8.05	7.26	6.75	9.76	7.1	12.42	4.9	8.02
Cluster-Chr12-1	GH_A12G2462	5.62	3.49	4.32	0.62	3.4	1.18	4.49	2.06	3.84	1.68
Cluster-Chr12-1	GH_A12G2464	1.96	2.26	11.48	4.68	6.83	2	4.11	0.22	2.98	1.15
Cluster-Chr12-1	GH_A12G2467	0.22	0	1.6	1.25	0.22	0.05	0.13	0.15	1.26	0.25
Cluster-Chr12-1	GH_A12G2468	9.35	14.18	3.68	5.68	1.8	3.24	1.47	1.82	2.2	1.24
Cluster-Chr12-1	GH_A12G2469	11.63	12.24	6.3	6.1	2.37	4.74	1.38	1.96	1.63	1.17
Cluster-Chr12-1	GH_A12G2470	0.1	0.12	50.39	26.27	56.67	33.8	5.19	3.56	0.63	0.23
Cluster-Chr12-1	GH_A12G2471	2.9	2	130.3	165.79	193.02	187.29	97.48	39.85	47.37	39.64
Cluster-Chr12-1	GH_A12G2472	8.46	3.95	3.76	0.87	1.39	0.5	1.44	0.47	6.2	1.76
Cluster-Chr12-1	GH_A12G2474	3.25	2.32	0.41	0.3	0	0.16	0.19	0	0.38	0.2
Cluster-Chr12-1	GH_A12G2476	5.64	5.09	1.73	1.77	1.14	0.9	0.68	0.09	0.3	0.15
Cluster-Chr12-1	GH_A12G2477	44.16	39.17	22.2	24.34	23.93	31.64	31.29	30.94	29.32	38.09
Cluster-Chr12-1	GH_A12G2478	6.69	6.12	13.09	10.49	11.48	11.55	15.9	9.41	15.78	15.29
Cluster-Chr12-1	GH_A12G2479	19.8	19.9	11.68	12.09	8.65	10.86	10	9.87	9.41	7.98
Cluster-Chr12-1	GH_A12G2480	10.29	10.54	17.49	7.68	9.11	6.71	5.77	1.78	1.6	1.28
Cluster-Chr12-1	GH_A12G2481	25.1	31.01	2.43	4.44	0.67	0.47	0.33	0.29	1.12	0.36
Cluster-Chr12-1	GH_A12G2482	12.04	15.07	6.15	7.17	2.67	3.2	1.82	1.24	3.14	1.4
Cluster-Chr12-1	GH_A12G2484	3.94	4.84	0.65	0.94	0.16	0.41	0.16	0.21	0.22	0.23
Cluster-Chr12-1	GH_A12G2485	0	0.11	0.04	0.27	2.08	0.52	5.04	0.9	0.93	1.45
Cluster-Chr12-1	GH_A12G2486	0.03	0	0.05	0	1.14	0.09	1.69	0.42	0.31	0.29
Cluster-Chr12-1	GH_A12G2487	32.27	54.94	24.32	14.56	17.3	9.33	4.12	0.82	0.47	0.1
Cluster-Chr12-1	GH_A12G2488	5.65	7.96	2.1	3.42	0.59	1.29	0.23	0.29	0.13	0.13
Cluster-Chr12-1	GH_A12G2490	20.83	25.76	24.85	22.53	13.44	13.03	4.46	4.47	2.86	1.69
Cluster-Chr12-1	GH_A12G2491	0.52	0.36	0.48	0.44	38.9	37.33	0.42	1.55	0.39	0.15
Cluster-Chr12-1	GH_A12G2493	4.17	3.86	3.17	1.81	2.91	1.99	1.16	0.58	1.32	0.77
Cluster-Chr12-1	GH_A12G2494	20.53	21.52	9.35	7.72	4.65	5.41	5.5	3.47	6.71	7.89
Cluster-Chr12-1	GH_A12G2495	2.79	3.7	2.58	1.58	5.68	3.7	6.07	2.55	4.14	2.6
Cluster-Chr12-1	GH_A12G2496	14.83	24.44	1.34	2.37	0.47	0.35	0.07	0.16	0.04	0.04
Cluster-Chr12-1	GH_A12G2497	10.12	8.41	3.04	2.1	1.14	0.83	0.91	0.2	1.13	1.31
Cluster-Chr12-1	GH_A12G2499	37.22	39.1	27.16	36.33	32.97	25.39	46.55	40.59	69.12	72.98
Cluster-Chr12-1	GH_A12G2500	6.36	5.21	19.19	30.88	12.71	29.28	13.31	19.8	10.73	11.75
Cluster-Chr12-1	GH_A12G2501	5.63	4.17	1.34	1.22	0.06	0.1	0.05	0.08	0.39	0.37
Cluster-Chr12-1	GH_A12G2502	2.27	2.21	0.04	0.1	0.02	0	0	0	0.07	0.1
Cluster-Chr14-1	GH_D02G0672	3.6	4.37	0.68	1.95	0.45	2.37	0.84	6.6	0.44	3.85
Cluster-Chr14-1	GH_D02G0673	0.19	0.65	0.16	2.94	0.06	2.93	0.05	0.7	0.21	0.14
Cluster-Chr14-1	GH_D02G0675	4.45	5.07	5.46	5.13	5.39	6.01	3.66	3.25	3.37	2.66
Cluster-Chr14-1	GH_D02G0678	28.6	25.74	17.69	14.41	14.77	10.07	14.93	6.67	12.62	5.27
Cluster-Chr14-1	GH_D02G0679	9.44	5.25	4.08	2.85	2.24	2.1	2.4	1.63	1.57	1.18
Cluster-Chr14-1	GH_D02G0680	3.09	0.81	8.17	3.69	8.53	4.08	10	3.25	7.39	2.85
Cluster-Chr14-1	GH_D02G0681	8.84	11.5	60.59	38.71	104.6	58.21	99.36	45.22	74.09	8.01
Cluster-Chr14-1	GH_D02G0682	0.62	0.29	0.27	0.14	0.19	0.25	0.08	0.53	0.13	2.47
Cluster-Chr14-1	GH_D02G0683	12.7	3.07	1.35	0.43	1.12	0.67	0.87	0.54	0.63	0.03
Cluster-Chr14-1	GH_D02G0684	7.19	8.75	1.99	2.92	0.82	1.52	0.67	0.8	0.65	0.69
Cluster-Chr14-1	GH_D02G0685	3.56	0.19	0.51	0.07	0.17	0	0.25	0	0.85	0
Cluster-Chr14-1	GH_D02G0686	16.92	16.58	27.45	11.19	19.03	7.27	8.74	6.32	8.6	7.12
Cluster-Chr14-1	GH_D02G0687	23.65	27.26	15.43	8.65	6.11	4.24	8.4	4.55	13.15	5.6
Cluster-Chr14-1	GH_D02G0688	10.96	11.14	9.92	14.3	22.06	20.66	21.38	19.36	12.64	16.48
Cluster-Chr14-1	GH_D02G0689	10.98	13.07	2.29	2.6	1.62	5.45	7.34	20.89	8.23	11.07
Cluster-Chr14-1	GH_D02G0691	5.85	3.17	3.95	15.68	7.51	8.17	2.34	8.75	0.95	0.88
Cluster-Chr14-1	GH_D02G0694	15.78	16.12	17.54	17.24	19.39	20.99	14.17	7.64	8.27	7.84
Cluster-Chr14-1	GH_D02G0695	1.71	2.33	0	0.04	0.02	0	0	0	0.02	0
Cluster-Chr14-1	GH_D02G0696	34.99	29.18	20.27	18.79	15.98	17.34	14.3	16.51	15.99	16.7
Cluster-Chr14-1	GH_D02G0697	118.18	88.77	146.81	161.55	148.64	143.09	155.86	90.79	92.15	53.24
Cluster-Chr14-1	GH_D02G0698	5.24	7.29	3.17	3.19	0.82	1.62	0.97	1.41	1.13	0.81
Cluster-Chr14-1	GH_D02G0700	17.63	21.45	24.8	26.77	37.7	37.73	34.46	32.03	20.83	12.77
Cluster-Chr14-1	GH_D02G0701	0	1.09	0	0.48	0	0.97	0	0.15	0.03	0.07
Cluster-Chr14-1	GH_D02G0703	9.68	10.77	10.22	7.73	10.72	8.57	11.86	9.88	10.03	6.11
Cluster-Chr14-1	GH_D02G0704	13.81	14.37	32.03	32.78	28.35	32.76	29.32	36.54	16.94	12.69
Cluster-Chr14-1	GH_D02G0705	4.12	4.79	2.54	2.43	1.75	1.26	2.17	1.16	1.71	0.6
Cluster-Chr14-1	GH_D02G0707	10.71	6.92	7.83	5.11	5.7	4.34	4.87	3.85	3.77	1.68
Cluster-Chr14-1	GH_D02G0710	9.65	10.89	7.68	9.26	6.77	9.86	6.11	4.91	4.41	3.86
Cluster-Chr14-1	GH_D02G0712	0.07	0.21	0.13	0	0.17	0.06	0.16	0.04	1.27	0.29
Cluster-Chr14-1	GH_D02G0713	1.54	5.82	15.59	7.8	9.87	9.46	12.55	9.49	91.8	23.65
Cluster-Chr14-1	GH_D02G0715	21.66	9.35	8.07	4.87	1.63	2.19	6.45	4.39	54.29	164.01
Cluster-Chr14-1	GH_D02G0716	18.19	21	9.86	8.3	6.87	6.61	7.68	8.13	6.02	3.74
Cluster-Chr14-1	GH_D02G0717	2.19	1.88	0.29	0.27	0.06	0.08	0.22	0.02	0.27	0.15
Cluster-Chr14-1	GH_D02G0718	0.52	0.67	0.9	0.23	1.9	0.25	0.2	0.07	0.11	0.1
Cluster-Chr14-1	GH_D02G0719	9.47	11.84	5.06	4.35	2.26	2.42	4.68	2.73	4.89	4.03
Cluster-Chr14-1	GH_D02G0723	1.11	1.29	0.31	0.59	1.45	4.44	5.89	14.98	8.21	21.64
Cluster-Chr14-1	GH_D02G0724	7.17	7.93	9.44	8.75	8.39	9.21	10.71	9.39	10.91	9.52
Cluster-Chr14-1	GH_D02G0726	1.18	1.45	0.4	0.48	0.29	0.31	0.2	0.18	0.34	0.15
Cluster-Chr14-1	GH_D02G0728	118.2	96.92	126.83	84.49	110.69	160.03	228.45	97.42	117.68	52.78
Cluster-Chr14-1	GH_D02G0729	1.22	4.15	0.21	0.26	0	0.01	0	0.01	0	0.02
Cluster-Chr14-1	GH_D02G0730	23.5	25.75	11.14	11.15	5.66	6.97	5.61	5.82	5.45	3.75
Cluster-Chr14-1	GH_D02G0732	19.87	15.53	27.87	42.67	21.79	48.98	17.18	40.07	15.94	26.06
Cluster-Chr14-1	GH_D02G0734	19.5	66.87	18.33	19.79	34.45	9.15	37.19	5.29	285.49	68.1
Cluster-Chr14-1	GH_D02G0738	45.95	39.27	16.2	15.5	11.52	11.16	5.8	4.8	8.98	4.76
Cluster-Chr14-1	GH_D02G0739	1.63	1.54	0.12	0.15	0	0.19	0	0	0	0.05
Cluster-Chr14-1	GH_D02G0741	16.47	14.61	25.79	31.51	31.42	41.95	35.84	31.64	26.3	29.42
Cluster-Chr14-1	GH_D02G0742	5.34	6.42	3.54	3.77	2.44	2.78	1.91	1.66	1.13	1.23
Cluster-Chr14-1	GH_D02G0743	22.09	23.73	6.58	6.91	3.2	3.48	5.3	6.21	6.07	4.19
Cluster-Chr14-1	GH_D02G0746	5.86	4.14	1.23	0.76	0.06	0.08	0.14	0.05	0.03	0.05
Cluster-Chr14-1	GH_D02G0747	2.75	2.45	2.76	31.7	0.64	2.94	0.2	0.12	0.07	0.5
Cluster-Chr14-1	GH_D02G0749	10.85	14.29	14.9	16.67	20.78	23.72	27.62	18.88	20.44	26.35
Cluster-Chr14-1	GH_D02G0750	8.58	15.41	3.73	5.08	2.57	2.41	2.84	1.25	4.09	1.78
Cluster-Chr14-1	GH_D02G0751	17.95	17.6	8.65	11.22	5.8	8.08	3.94	3.86	3.17	2.35
Cluster-Chr14-1	GH_D02G0752	16.46	13.53	15.19	15.36	21.12	42.01	47.92	65.9	98.19	167.12
Cluster-Chr14-1	GH_D02G0753	55.1	47.28	10.56	6.44	1.82	1.5	1.83	1.39	5.07	2.95
Cluster-Chr14-1	GH_D02G0757	7.31	4.24	4.89	4.28	1.43	1.78	1.56	1.49	6.12	4.71
Cluster-Chr14-1	GH_D02G0758	2.83	3.66	1.2	1	0.88	0.96	0.75	0.51	0.4	0.2
Cluster-Chr14-1	GH_D02G0760	1.9	1.32	1.06	0.93	0.17	0.1	0.29	0.52	1.2	0.53
Cluster-Chr14-1	GH_D02G0761	0.31	1.03	0.06	0.2	0.03	0.07	0	0.03	0.23	0
Cluster-Chr14-1	GH_D02G0770	20.95	19.36	35	62.93	31.75	37.74	12.17	24.75	10.64	10.93
Cluster-Chr14-1	GH_D02G0772	0	0.06	0.03	0	1.22	0.04	2.5	0.03	6.04	0.04
Cluster-Chr14-1	GH_D02G0781	15.59	5.19	7.14	1.92	3.6	0.82	2.31	0.55	1.71	0.28
Cluster-Chr14-1	GH_D02G0784	4.63	4.97	2.15	1.66	0.83	1.09	0.95	0.69	0.26	0.34
Cluster-Chr14-1	GH_D02G0785	0.32	1.33	0.04	0.13	0.08	0.06	0	0	0.04	0
Cluster-Chr14-1	GH_D02G0786	15.4	16.2	7.67	7.36	3.76	4.41	2.67	3.49	3.17	2.63
Cluster-Chr14-1	GH_D02G0789	10.84	12.56	3.61	3.96	1.41	1.04	0.8	1.22	1.93	1.35
Cluster-Chr14-1	GH_D02G0791	14.56	17.02	4.76	5.34	2.74	2.54	2.4	2.12	2.7	1.65
Cluster-Chr14-1	GH_D02G0795	14.79	17.26	13.99	12.94	14.26	19.49	21.08	13.79	21.28	18.97
Cluster-Chr14-1	GH_D02G0797	33.19	23.89	10.12	8.21	2.39	5.54	5.99	3.3	34.48	15.74
Cluster-Chr14-1	GH_D02G0798	17.84	17.75	6.76	6.16	3.65	2.72	2.76	2.5	3.32	1.52
Cluster-Chr14-1	GH_D02G0799	39.45	38.56	55.36	68.87	40.43	64.7	74.06	149.47	75.76	88.81
Cluster-Chr14-1	GH_D02G0800	5.67	3.44	1.73	1.59	0.39	0.33	0.32	0.3	1.21	0.53
Cluster-Chr14-1	GH_D02G0801	8.81	6.18	8.88	6.33	10.79	7.7	11.53	5.38	12.46	9.42
Cluster-Chr14-1	GH_D02G0802	35.6	6.04	7.13	3.02	29.26	7.7	35.42	7.11	12.85	4.16
Cluster-Chr14-1	GH_D02G0803	14.12	11.15	4.23	3.47	1.57	1.6	16.12	15.6	18.7	30.88
Cluster-Chr14-1	GH_D02G0804	0.74	1.36	8.77	13.37	11.15	22.84	11.24	10.53	8.01	7.08
Cluster-Chr14-1	GH_D02G0805	13.79	9.07	27.75	25.73	29.2	29.4	30.57	18.12	18.51	24.92
Cluster-Chr14-1	GH_D02G0806	2.17	1.71	0.68	0.57	0.26	0.22	0.17	0.06	0.9	0.33
Cluster-Chr14-1	GH_D02G0809	2.22	2.61	0.64	0.99	0.36	0.97	0.14	0.22	0.27	0.12
Cluster-Chr14-1	GH_D02G0812	0.07	0.02	0.26	0.2	1.26	0.2	0.07	0.07	0	0.11
Cluster-Chr14-1	GH_D02G0813	25.82	24.89	36.64	20.86	31.65	18.46	23.25	4.51	27.14	14.75
Cluster-Chr14-1	GH_D02G0815	1.79	1.23	7.17	8.21	0.88	0.08	0.5	0.34	3.2	0.54
Cluster-Chr14-1	GH_D02G0817	7.76	8.75	12.68	10.36	9.01	7.53	7.6	3.46	6.4	4.72
Cluster-Chr14-1	GH_D02G0818	1.76	3.13	1.74	1.87	0.52	0.48	0.24	0.14	0.25	0.08
Cluster-Chr14-1	GH_D02G0819	35.24	26.24	35.82	31.88	21.31	23.96	16.86	13.53	9.94	6.46
Cluster-Chr14-1	GH_D02G0820	5.16	4.32	5.51	3.4	5.05	2.67	2.97	2.58	3.33	2.64
Cluster-Chr14-1	GH_D02G0822	6.01	5.49	2.92	2.81	3.9	3.47	4.48	2.87	1.42	2.74
Cluster-Chr14-1	GH_D02G0823	8.58	9.94	6.04	3.91	2.82	2.59	3.64	2.03	7.6	6.03
Cluster-Chr14-1	GH_D02G0824	2.47	0.07	0.84	10.42	2.4	24.03	1.63	10.03	2.16	7.42
Cluster-Chr14-1	GH_D02G0825	14.95	14.52	8.38	9.42	11.55	9.57	8.94	8.76	5.96	10.01
Cluster-Chr14-1	GH_D02G0828	16.35	13.68	10.17	8.11	10.55	7.36	9.07	4.94	6.64	3.38
Cluster-Chr14-1	GH_D02G0830	11.56	13.54	5.51	5.95	3.48	5.06	2.81	2.06	3.47	1.38
Cluster-Chr14-1	GH_D02G0831	14.7	14.37	10.06	12.75	11.56	13.14	14.71	12.96	10.09	11.75
Cluster-Chr14-1	GH_D02G0832	6.15	7.64	5.41	7.5	3.01	6.53	2.49	4.5	3.18	3.7
Cluster-Chr14-1	GH_D02G0833	18.57	35.43	11.45	28.27	1.91	19.36	1.68	5.57	2.92	6.43
Cluster-Chr14-1	GH_D02G0835	7.44	7.4	4.38	2.66	2.9	0.99	3.67	0.81	3.23	1.39
Cluster-Chr14-1	GH_D02G0836	4.65	11.46	2.63	5.59	1.16	3.86	1.72	4.85	1.87	3.31
Cluster-Chr14-1	GH_D02G0837	2.15	1.99	0.47	1.65	0.4	1.94	2.46	2.42	6.07	1.71
Cluster-Chr14-1	GH_D02G0840	264.36	193.13	380.13	376.91	751.05	563.84	642.67	482.22	346.01	335.9
Cluster-Chr14-1	GH_D02G0843	7.66	8.75	0.51	0.97	0.68	0.21	0.68	0.24	1.4	0.61
Cluster-Chr14-1	GH_D02G0844	39.62	24.26	37.17	11.43	32.71	11.66	43.76	16.06	52.25	22.49
Cluster-Chr14-1	GH_D02G0845	19.01	22.86	3.37	4.14	2.51	6.12	0.55	1.15	0.04	0.15
Cluster-Chr14-1	GH_D02G0846	11.65	13.19	2.47	2	0.33	0.32	0.21	0.08	0.1	0.07
Cluster-Chr14-1	GH_D02G0847	2.61	1.14	0.99	0.57	0.64	0.47	0.49	0.34	0.86	0.06
Cluster-Chr14-1	GH_D02G0848	14.3	9.93	2.16	4.14	1.86	1.71	0.25	0.54	2.06	0.17
Cluster-Chr14-1	GH_D02G0849	10.85	3.52	0.85	1.5	1.78	0.71	1.32	2.96	1.03	0.55
Cluster-Chr14-1	GH_D02G0850	0.87	1.12	0.97	0.55	1.01	0.19	1.39	0.27	1.38	0.32
Cluster-Chr14-1	GH_D02G0856	0.71	0.16	0.05	0.07	0.02	0.18	0.06	6.75	0.37	3.36
Cluster-Chr14-1	GH_D02G0858	5.73	4.1	4.28	3.37	6.16	3.31	4.8	2.14	2.31	1.39
Cluster-Chr14-1	GH_D02G0859	0	0	0	0.27	0.04	0	1.9	5.54	12.92	12.32
Cluster-Chr14-1	GH_D02G0861	30.69	20.42	10.97	14.72	15.53	5.35	26.92	16.54	39.84	32.16
Cluster-Chr14-1	GH_D02G0863	10.53	4.34	2.89	2.16	2.11	1.19	2.33	1.57	2.43	1.08
Cluster-Chr14-1	GH_D02G0864	7.7	6.35	2.3	1.53	1.04	1.37	2.49	1.98	1.61	1.38
Cluster-Chr14-1	GH_D02G0866	29.68	22.11	9.76	6.94	6.43	4.02	10.05	9.31	10.51	7.07
Cluster-Chr14-1	GH_D02G0868	6.5	5.28	3.26	2.28	2.45	2.28	3.9	2.68	5.17	5.21
Cluster-Chr14-1	GH_D02G0871	228.45	40.83	61.6	18.83	4.07	1.76	0.88	0.47	2.02	0.5
Cluster-Chr14-1	GH_D02G0873	18.49	15.27	8.5	5.1	7.64	5.59	10.76	7.67	8.33	11.07
Cluster-Chr14-1	GH_D02G0875	8.63	17.65	2.1	3.67	0.6	1.32	0.27	0.24	0.9	0.97
Cluster-Chr14-1	GH_D02G0877	6.38	6.75	6.63	5.49	4.84	4.48	5.5	4.34	5.14	2.56
Cluster-Chr14-1	GH_D02G0878	6.77	8.67	3.21	4.03	1.91	2.59	2.54	3.77	3.36	2.75
Cluster-Chr14-1	GH_D02G0879	19.56	16.52	45.98	46.5	29.05	35.52	42.42	66.72	36.39	55.46
Cluster-Chr14-1	GH_D02G0880	12.38	14.71	13.1	10.6	8.72	8.81	12.84	21.12	19.42	10
Cluster-Chr14-1	GH_D02G0882	11.04	4.1	2.4	3	1.9	1.2	1.65	0.96	3.64	1.06
Cluster-Chr14-1	GH_D02G0883	0.13	0.08	1.37	0.15	0.03	0.03	0.13	0.03	0.82	0.06
Cluster-Chr14-1	GH_D02G0886	24.76	27.1	717.02	515.55	926.77	605.44	565.68	531.11	258.05	227.95
Cluster-Chr14-1	GH_D02G0887	4.25	1.17	0.39	0.14	0.09	0	0	0	0.28	0.17
Cluster-Chr14-1	GH_D02G0889	0.38	2.14	0.05	0.17	0.1	0.03	0.05	0	0.22	0.13
Cluster-Chr14-1	GH_D02G0892	5.29	3.58	1.56	0.98	0.54	0.09	1.12	0.35	0.59	0.27
Cluster-Chr14-1	GH_D02G0893	0.95	1.58	0.37	0.34	0.27	0.18	0.42	0.43	0.38	0.13
Cluster-Chr14-1	GH_D02G0894	8.25	7.01	1.94	2.04	0.77	0.84	0.85	1.77	0.9	1.01
Cluster-Chr14-1	GH_D02G0895	20.33	14.75	3.71	4.22	1.64	2.1	0.92	0.74	2.62	2.44
Cluster-Chr14-1	GH_D02G0896	9.92	6.47	1.4	1.24	0.8	0.6	0.39	0.35	0.07	0.06
Cluster-Chr14-1	GH_D02G0897	0.5	0.64	0.54	0.23	2.42	0.14	15.87	0.94	13.56	1.68
Cluster-Chr14-1	GH_D02G0899	2.37	0.33	0.12	0.94	0	0.21	0	0	0	0
Cluster-Chr14-1	GH_D02G0902	3.09	3.62	0.4	0.59	1.91	0.43	0.26	0.04	0.24	0.01
Cluster-Chr14-1	GH_D02G0904	11.82	13.38	5.85	3.63	5.04	3.65	6.18	4.03	6.81	2.99
Cluster-Chr14-1	GH_D02G0905	0.94	3.18	0.05	0.4	0.29	0.12	0.27	0	0.06	0.08
Cluster-Chr14-1	GH_D02G0906	4.97	0	15.44	0.19	17.62	0	17.45	0.39	4.23	0
Cluster-Chr14-1	GH_D02G0907	11.35	11.9	46.56	14.84	0.48	0.53	0.99	0.48	0.81	0.52
Cluster-Chr14-1	GH_D02G0908	3.09	3.96	3.41	2.66	2.95	2.53	2.32	1.7	2.18	1.05
Cluster-Chr14-1	GH_D02G0909	351.91	105.77	52.74	116.02	22.14	23.7	1.61	6.2	5.11	2.51
Cluster-Chr14-1	GH_D02G0910	8.67	2.7	1.2	2.59	0.33	0.98	0.16	0.6	1.65	1.24
Cluster-Chr14-1	GH_D02G0911	2.29	3.12	2.83	2.16	0.58	0.66	0.36	0.06	0.61	0.18
Cluster-Chr14-1	GH_D02G0913	25.19	11.83	23.64	30.82	21.09	18.11	11.32	7.12	6.89	3.91
Cluster-Chr14-1	GH_D02G0914	0.42	0.19	0.29	0.06	2.47	1.6	1.77	1.5	4.09	2
Cluster-Chr14-1	GH_D02G0915	33.54	16.3	205.66	194.29	43.38	31.97	11.58	3.63	2.3	1.04
Cluster-Chr14-1	GH_D02G0917	0.05	0.04	0.3	0.95	1.2	1.42	1.64	6.62	2.6	1.46
Cluster-Chr14-1	GH_D02G0918	64.4	103.41	68.92	139.96	367.25	378.6	220.33	163.32	181.66	452.8
Cluster-Chr14-1	GH_D02G0919	18.45	21.86	5.49	9.35	3.04	4.43	0.72	1.3	0.28	0.15
Cluster-Chr14-1	GH_D02G0920	0.83	1.22	0.35	0.47	0.17	0.95	0.85	0.61	0.23	0.87
Cluster-Chr14-1	GH_D02G0921	4.05	1.82	0.6	0.13	0.58	0.19	0.33	0	0.09	0
Cluster-Chr14-1	GH_D02G0924	0.83	0.86	1.08	1.93	0.67	1.07	0.65	0.69	1.36	1.23
Cluster-Chr14-1	GH_D02G0925	23.11	26.54	4.93	6.76	2.67	3.56	2.73	3.4	4.86	4.52
Cluster-Chr14-1	GH_D02G0926	2.82	9.1	1.97	16.77	3.42	18.35	2.32	16.6	1.29	9.78
Cluster-Chr14-1	GH_D02G0931	4.39	5.12	0.79	0.55	0.33	0.04	0.2	0	0.12	0.1
Cluster-Chr14-1	GH_D02G0932	1.8	3.05	3.78	1.73	4.12	1.71	2.14	0.48	1	0.91
Cluster-Chr14-1	GH_D02G0935	0.12	0.2	0.31	0	0.35	0.16	3.51	3.26	4.32	0.47
Cluster-Chr14-1	GH_D02G0937	4.85	9.37	1.98	2.57	0.79	1.21	0.42	0.42	0.88	0.58
Cluster-Chr14-1	GH_D02G0938	2.62	2.35	2.49	1.54	1.43	1.49	1.06	1.45	0.37	0.73
Cluster-Chr14-1	GH_D02G0939	13.12	13.92	7.89	9.07	5.49	7.87	5.77	5.81	5.44	2.67
Cluster-Chr14-1	GH_D02G0940	0.72	2.56	0.18	0.56	0	0	0.04	0	0	0
Cluster-Chr14-1	GH_D02G0944	2.07	1.77	1.84	0.88	0.73	0.95	0.61	0.29	0.2	0.19
Cluster-Chr14-1	GH_D02G0951	3.53	0.9	1.83	0.76	0.8	0.72	14.12	14.33	24.16	24.16
Cluster-Chr14-1	GH_D02G0953	2	3.18	0.68	0.71	0.36	0.76	0.17	0.22	0.07	0.03
Cluster-Chr14-1	GH_D02G0957	13.08	33.34	7.43	14.49	3.06	9.24	3.54	7.14	3.27	4.12
Cluster-Chr14-1	GH_D02G0959	5.24	10.05	2.49	2.47	1.43	2.05	3.26	4.63	8.72	4.28
Cluster-Chr14-1	GH_D02G0961	0	0.31	0.66	0.24	0.59	0.11	0.76	1.04	0.25	0.73
Cluster-Chr14-1	GH_D02G0964	5.15	2.42	0.81	0.26	1.61	0.8	0.4	1.93	0.24	4.55
Cluster-Chr14-1	GH_D02G0965	61.03	65.34	9.55	8.36	2.71	2.17	3.04	6.76	3.37	5.5
Cluster-Chr14-1	GH_D02G0967	25.58	26.9	5.66	6.45	2.44	1.54	1.18	0.51	1.92	1.67
Cluster-Chr14-1	GH_D02G0968	13.12	12.79	11.56	10.45	7.84	9.4	8.96	6.8	6.27	3.9
Cluster-Chr14-1	GH_D02G0971	11.41	15.09	1.02	2.16	0.53	0.81	0.22	0.43	0.36	0.3
Cluster-Chr14-1	GH_D02G0973	27.38	31.01	21.99	22.05	16.88	17.88	17.83	7.85	10.09	9.44
Cluster-Chr14-1	GH_D02G0974	12.12	14.58	2.42	4.1	1.86	1.24	0.59	0.57	1.75	1.56
Cluster-Chr14-1	GH_D02G0975	13.65	13.17	33.21	28.86	17.95	27.15	9.69	7.3	7.3	4.8
Cluster-Chr14-1	GH_D02G0976	0.21	0.08	1.3	1.72	2.01	3.15	1.18	2.55	0.38	2.54
Cluster-Chr14-1	GH_D02G0978	20.61	9.45	14.42	6.38	13.96	6.38	22.51	10.43	14.47	2.72
Cluster-Chr14-1	GH_D02G0980	12.03	8.71	4.54	4.41	5.17	6.21	7.11	5.56	5.02	5.56
Cluster-Chr14-1	GH_D02G0983	0.27	0.03	3.57	3.29	10.07	11	19.14	13.28	11.6	17.92
Cluster-Chr14-1	GH_D02G0984	3.8	6.69	1.02	3.32	0.52	3.82	0.82	8.07	1.18	10.46
Cluster-Chr14-1	GH_D02G0986	1.7	1.7	3.62	4.67	6.08	9.88	5.99	6.13	3.29	7.44
Cluster-Chr14-1	GH_D02G0987	4.83	10.52	5.7	8.55	9.77	4.59	2.39	1.9	8.35	17.45
Cluster-Chr14-1	GH_D02G0989	9.64	8.98	2.05	1.56	0.48	0.43	2.05	1.14	1.97	1.5
Cluster-Chr14-1	GH_D02G0990	38.29	51.14	47.41	61.03	52.36	64.19	47.29	44.1	22.53	29.82
Cluster-Chr14-1	GH_D02G0991	3.36	4.13	1.53	1.35	2.31	1.88	2.1	0.61	1.7	1.94
Cluster-Chr14-1	GH_D02G0993	62.32	93.05	55.39	53.29	21.68	47.46	26.25	24.14	18.97	26.12
Cluster-Chr14-1	GH_D02G0997	1.89	0.3	1.65	0.33	1.17	0.33	1.92	0.94	3.54	1.39
Cluster-Chr14-1	GH_D02G0999	7.5	7.11	4.38	3.53	2.2	2.05	2.06	1.7	2.01	0.96
Cluster-Chr14-1	GH_D02G1000	21.23	25.08	9.65	11.87	7.02	10.01	6.93	10.56	9.45	7.39
Cluster-Chr14-1	GH_D02G1001	18.7	17.02	15.33	21.9	8.11	11.54	8.9	8.38	4.73	4.74
Cluster-Chr14-1	GH_D02G1004	25.58	24.1	10.18	11.28	10.78	10.4	10.36	11.04	11.82	7.46
Cluster-Chr14-1	GH_D02G1005	14.2	15.2	13.66	13.98	8.98	11.15	10.26	7.54	5.73	4.57
Cluster-Chr14-1	GH_D02G1007	1.61	2.37	0.28	0.71	0.08	0.29	0.03	0.25	0.1	0.17
Cluster-Chr14-1	GH_D02G1008	7.86	7.7	21.52	19.23	7.48	2.2	0.69	1.9	0.37	0.12
Cluster-Chr14-1	GH_D02G1010	13.53	14.68	6.84	7.95	9.04	6.7	5.2	0.71	0.63	0.13
Cluster-Chr14-1	GH_D02G1011	12.78	16.56	39.56	34.41	39.56	37.37	14.09	4.97	2.01	0.55
Cluster-Chr14-1	GH_D02G1013	5.13	3.64	2.23	2.8	1.13	0.88	0.46	0.35	0.96	0.55
Cluster-Chr14-1	GH_D02G1014	16.02	13.89	19.8	16.34	21.63	20.81	23.28	18.39	20.44	13.11
Cluster-Chr14-1	GH_D02G1015	0.25	0.08	2.22	3.58	5.26	8.51	7.16	9.7	8.98	11.79
Cluster-Chr14-1	GH_D02G1018	0.57	0.26	1.19	0.56	1.18	0.88	0.43	1.02	0.59	1.15
Cluster-Chr14-1	GH_D02G1019	13.91	12.87	4.31	6.81	1.13	1.4	1.92	0.91	2.71	0.66
Cluster-Chr14-1	GH_D02G1020	18.32	31.21	64.83	55.49	79.66	96.56	74.32	57.54	37.52	20.15
Cluster-Chr14-1	GH_D02G1021	6.09	8.51	2.07	2.48	1.19	1.66	1.44	1.59	1.47	1
Cluster-Chr14-1	GH_D02G1023	0.49	0.31	0.22	2.21	0.05	0.12	0.14	0.21	0.42	0.06
Cluster-Chr14-1	GH_D02G1026	5.16	1.06	4.32	1	1.77	0.66	2.49	0.09	2.49	0.3
Cluster-Chr14-1	GH_D02G1030	2.19	2.5	1.88	1.94	1.73	1.3	1.33	0.6	1.3	0.71
Cluster-Chr14-1	GH_D02G1033	21.29	30.66	2.85	4.9	0.51	3.15	0.12	1.46	0.13	0.81
Cluster-Chr14-1	GH_D02G1034	13.81	13.46	12.84	13.94	10.54	12.59	10.93	10.75	4.64	6.24
Cluster-Chr14-1	GH_D02G1035	105.36	137.9	50.58	39.57	15.51	24.05	18.52	14.19	19.01	10.13
Cluster-Chr14-1	GH_D02G1036	11.41	12.01	3.19	2.71	1.76	1.41	1.77	1.23	1.24	1.71
Cluster-Chr14-1	GH_D02G1038	8.47	6.84	4.18	3.64	4.84	3.5	2.04	1.88	2.86	1.47
Cluster-Chr14-1	GH_D02G1041	2.78	2.39	2.28	1.33	0.72	0.47	0.15	0.06	0.08	0.05
Cluster-Chr14-1	GH_D02G1042	225.31	194.07	54.08	59.27	34.16	47.28	47.06	47.74	53.2	65.91
Cluster-Chr14-1	GH_D02G1044	11.51	12.37	7.92	7.24	6.37	6.58	7.42	7.02	7.3	5.69
Cluster-Chr14-1	GH_D02G1045	28.19	17.11	14.96	12.95	14.84	16.91	17.6	13.7	10.82	15.18
Cluster-Chr14-1	GH_D02G1046	2.03	13.19	4.52	6.89	4.96	8.31	4.42	4.38	1.61	3.27
Cluster-Chr14-1	GH_D02G1047	65.11	53.9	55.7	58.85	35.65	41.72	39.66	32.91	30.93	21.72
Cluster-Chr14-1	GH_D02G1050	9.36	9.43	9.43	7.19	7.16	6.39	6.65	4.96	5.11	2.61
Cluster-Chr14-1	GH_D02G1052	0.05	5.07	0.09	2.18	0	1.84	0	2.07	0.06	1.74
Cluster-Chr14-1	GH_D02G1053	75	43.14	174.81	198.53	166.99	206.54	180.95	149.74	120.05	110.6
Cluster-Chr14-1	GH_D02G1055	14.66	19.81	29.57	37.23	31.16	45.3	35.61	35.63	25.9	23.22
Cluster-Chr14-1	GH_D02G1056	9.29	8.56	9.26	7.35	8.31	8.21	8.45	6.69	7.37	6.16
Cluster-Chr14-1	GH_D02G1058	32.69	26.49	67.73	78.02	68.7	96.69	46.95	51.66	28.92	26.35
Cluster-Chr14-1	GH_D02G1059	5.92	6.03	3.27	3.46	3.59	3.04	3.48	3.15	2.83	1.96
Cluster-Chr14-1	GH_D02G1060	2.12	1.55	1.27	0.57	0.33	0.88	0.15	0.11	0.56	0.33
Cluster-Chr14-1	GH_D02G1066	8.5	9.73	6.67	4.84	4.66	3.44	4.03	4.24	4.39	2.23
Cluster-Chr14-1	GH_D02G1067	19.57	17.29	13.19	11.92	9.87	8.24	15.27	11.54	9.87	6.44
Cluster-Chr14-1	GH_D02G1068	4.76	0.23	10.5	0.17	19.42	0.43	25.25	1.33	8.17	0.45
Cluster-Chr14-1	GH_D02G1069	7.74	10.16	3.39	3.89	3.3	3.33	6.04	5.52	9.73	10.47
Cluster-Chr14-1	GH_D02G1071	13.6	20.76	7.85	15.5	8.98	17.74	6.11	11.43	5.23	8.22
Cluster-Chr14-1	GH_D02G1072	4.39	4.55	1.88	1.54	0.45	0.84	0.92	0.58	1.66	1
Cluster-Chr14-1	GH_D02G1073	0.75	0.93	2.3	1.74	0.4	0.53	0.36	0.4	0.75	0.33
Cluster-Chr14-1	GH_D02G1074	9.62	9.85	6.6	6.27	4.55	6.24	4.64	2.46	2.16	3.23
Cluster-Chr14-1	GH_D02G1077	17.93	30.63	5.3	9.48	6.5	9.04	3.28	11.45	5.64	8.98
Cluster-Chr14-1	GH_D02G1079	7.97	4.1	1.12	1.94	9.09	6.12	16.47	8.28	11.17	10.4
Cluster-Chr14-1	GH_D02G1080	12.18	12.72	3.01	3.33	1.79	1.62	2.37	1.5	3.44	1.92
Cluster-Chr14-1	GH_D02G1082	12.87	26.65	180.84	151.73	255.83	173.59	233.18	173.14	133.48	146.85
Cluster-Chr14-1	GH_D02G1083	5.33	5.63	12.75	11.54	10.02	14.95	16.17	26.86	14.42	9.4
Cluster-Chr14-1	GH_D02G1084	12.54	13.63	6.77	6.79	3.94	6.21	3.03	2.26	3.55	2.61
Cluster-Chr14-1	GH_D02G1087	0	0	1.04	1.39	0.06	0	0.54	0.19	0	0
Cluster-Chr14-1	GH_D02G1088	18.96	19.01	54.33	62.34	54.84	67.48	52.88	67.23	38.06	52.02
Cluster-Chr14-1	GH_D02G1089	1.4	1.79	1.4	1.41	1.53	1.99	1.95	1.13	0.76	0.71
Cluster-Chr14-1	GH_D02G1091	5.19	7.65	3.8	5.68	2.37	3.46	2.75	3.44	2.78	2.87
Cluster-Chr14-1	GH_D02G1092	8.36	6.78	3.4	1.41	2.17	1.34	3.04	1.56	3.31	2.41
Cluster-Chr14-1	GH_D02G1093	2.76	1.02	0.33	0.19	0.14	0.04	0.12	0.04	0.35	0.15
Cluster-Chr14-1	GH_D02G1094	7.53	7.91	8.53	7.51	6.15	9.06	7.37	8.39	4.97	4.29
Cluster-Chr14-1	GH_D02G1095	14.51	14.36	10.67	7.87	7.44	7.33	7.9	5.63	5.47	6.02
Cluster-Chr14-1	GH_D02G1096	2.81	4.12	0.59	0.54	0.04	0.16	0	0.09	0.27	0
Cluster-Chr14-1	GH_D02G1098	32.58	43.04	9.13	8.76	3.03	3.1	4.03	3.39	7.08	3.66
Cluster-Chr14-1	GH_D02G1101	24.07	20.91	48.23	42.55	42.56	43.03	38.23	31.07	26.67	17.91
Cluster-Chr14-1	GH_D02G1103	16.96	18.03	4.04	4.79	1.92	4.24	4.31	3.59	3.27	2.04
Cluster-Chr14-1	GH_D02G1104	12.75	17.44	5.51	2.58	4.24	0.59	4.56	0.26	1.31	0.11
Cluster-Chr14-1	GH_D02G1109	6.02	4.2	27.69	17.41	19.43	16.11	13.25	8.54	5.47	4.57
Cluster-Chr14-1	GH_D02G1111	5.22	10.13	1.49	2.81	0.21	0.67	0.05	0.18	0.19	0.22
Cluster-Chr14-1	GH_D02G1112	4.84	5.38	19.75	15.42	13.87	12.83	14.1	10.69	9.11	1.38
Cluster-Chr14-1	GH_D02G1113	9.59	7.79	5.28	3.98	3.23	3.08	3.2	2.75	3.34	2.42
Cluster-Chr14-1	GH_D02G1114	3.55	4.05	4.07	5.06	3.03	3.8	2.56	4.32	1.7	2.59
Cluster-Chr14-1	GH_D02G1116	11.39	19.13	1.32	3.47	0.13	0.13	0.09	0.03	0.04	0.03
Cluster-Chr14-1	GH_D02G1117	29.74	26.5	20.17	14.89	19.79	17.11	15.32	11.14	12.12	8.14
Cluster-Chr14-1	GH_D02G1118	17.93	19.74	40.04	47.59	34.94	28.62	8.6	8.29	7.81	3.15
Cluster-Chr14-1	GH_D02G1119	7.66	6.42	5.78	4.6	6.54	4.64	12.55	9.79	11.73	8.59
Cluster-Chr14-1	GH_D02G1127	15.93	15.53	8.16	9.77	7.92	11.72	6.67	6.95	6.43	6.04
Cluster-Chr14-1	GH_D02G1128	3.83	11.65	2.39	8.85	2.62	9.45	3.11	14.89	2.79	11.39
Cluster-Chr14-1	GH_D02G1129	8.4	2.56	3.96	1.63	2.95	1.79	3.63	1.87	4.08	1.25
Cluster-Chr14-1	GH_D02G1130	13.82	8.73	14.84	3.65	14.13	2.04	13.26	2	10.35	1.38
Cluster-Chr14-1	GH_D02G1131	4.35	6.02	3.05	2.97	1.46	1.67	11.25	7.46	62.96	95.31
Cluster-Chr14-1	GH_D02G1132	0.11	0.04	0.17	0.09	1.17	0.57	1.32	1.08	0.8	1.72
Cluster-Chr14-1	GH_D02G1134	7.56	11.41	3.98	14.4	3.41	14.74	2.74	9.59	3.77	8.18
Cluster-Chr14-1	GH_D02G1136	14.83	16.46	16.44	13.25	13.33	11.99	11.45	9.12	9.97	6.44
Cluster-Chr14-1	GH_D02G1138	25.08	21.53	19.89	18.14	13.66	13.88	22.15	14.23	17.33	23.9
Cluster-Chr14-1	GH_D02G1143	61.34	54.59	110.34	134.84	82.5	111.12	85.61	75.97	43.45	24.82
Cluster-Chr14-1	GH_D02G1144	1.92	3.83	10.78	10.55	9.42	10.37	9.49	7.84	11.07	13.63
Cluster-Chr14-1	GH_D02G1145	19.41	31.29	2.96	6.16	0.36	1.08	0.39	0.4	0.31	0.1
Cluster-Chr14-1	GH_D02G1147	6.59	3.18	2.33	0.84	0.87	0.29	0.63	0.24	0.84	0.06
Cluster-Chr14-1	GH_D02G1149	6.67	4.37	7	8.23	6.67	8.27	9.27	10.8	5.89	7.44
Cluster-Chr14-1	GH_D02G1150	3.73	4.05	1.55	1.15	0.5	0.44	0.79	0.53	0.34	0.71
Cluster-Chr14-1	GH_D02G1151	11.09	11.88	28.13	27	29.11	35.49	25.4	16.86	10.78	6.62
Cluster-Chr14-1	GH_D02G1152	0.03	8.76	0	1.89	0	0.97	0	0.67	0	1.11
Cluster-Chr14-1	GH_D02G1153	39.59	30.36	37.53	24.48	21.74	15.8	16.1	6.02	11.55	5.4
Cluster-Chr14-1	GH_D02G1154	14.79	14.85	8.13	8.11	6.41	5.51	5.13	3.54	3.35	2.49
Cluster-Chr14-1	GH_D02G1155	5.85	1.46	0.96	0.5	0.85	0.22	0.54	0.13	0.86	0.05
Cluster-Chr14-1	GH_D02G1157	114.03	112.8	49.78	56.47	12.02	20.66	12.27	7.3	17.81	7.84
Cluster-Chr14-1	GH_D02G1160	32.23	33.39	20.64	19.9	12.22	12.36	11.41	9.77	12.01	6.4
Cluster-Chr14-1	GH_D02G1161	1.44	1.12	5.95	7.36	3.69	3.82	3.21	2.18	4.9	2.47
Cluster-Chr14-1	GH_D02G1162	1.61	1.67	0.15	1.21	0	0	0	0	0.07	0
Cluster-Chr14-1	GH_D02G1164	1.77	0.09	1.44	0	1.58	0.06	0.84	0	1.22	0
Cluster-Chr14-1	GH_D02G1165	1.99	1.18	1.77	0.58	2.54	0.41	2.32	0.52	1.74	0.98
Cluster-Chr14-1	GH_D02G1166	5.14	4.45	1.49	1.32	1.36	2.11	0.57	0.21	1.16	0.69
Cluster-Chr14-1	GH_D02G1167	3.05	3.17	0.39	0.75	0.22	0.15	0.05	0.04	0.05	0.29
Cluster-Chr14-1	GH_D02G1168	1.81	1.36	0.74	0.74	0.63	0.72	0.44	0.47	0.68	0.82
Cluster-Chr14-1	GH_D02G1169	1.8	4.38	0.97	1.07	0.77	1.11	0.17	0.38	0.33	0.22
Cluster-Chr14-1	GH_D02G1170	9.97	20.9	11.12	15.3	10.66	16.47	10.95	14.54	8.08	8.49
Cluster-Chr14-1	GH_D02G1171	3.19	5.46	3.81	2.85	4.01	3.93	2.96	4.17	3.37	3.34
Cluster-Chr14-1	GH_D02G1172	2.71	2.08	2.4	1.92	2.6	2.21	2.34	2.16	1.97	2.71
Cluster-Chr14-1	GH_D02G1173	11.01	13.02	7.09	3.41	2.63	1.49	1.59	0.71	2.18	0.89
Cluster-Chr14-1	GH_D02G1174	8.09	5.52	11.06	4.33	8.13	3.72	2.7	1.53	2.08	0.72
Cluster-Chr14-1	GH_D02G1175	1.2	1.08	1.29	0.58	1.34	0.49	0.31	0.18	0.34	0.1
Cluster-Chr14-1	GH_D02G1180	1.37	1.43	1.47	0.83	0	0.79	0.96	0.46	0.51	1.4
Cluster-Chr14-1	GH_D02G1181	4.75	4.49	11.46	9.55	9.56	9.62	11.43	10.54	10.4	7.94
Cluster-Chr14-1	GH_D02G1182	6.8	6.54	3.28	2.09	2.11	0.84	2.86	1.47	3.33	2.48
Cluster-Chr14-1	GH_D02G1184	13.5	13.5	19.65	19.31	19.99	18.67	22.35	22.49	19.52	19.65
Cluster-Chr14-1	GH_D02G1190	31.24	37.16	26.22	23.88	23.17	29.21	32.28	39.59	18.76	9.07
Cluster-Chr14-1	GH_D02G1191	8.08	8.09	5.95	4.62	2.78	2.41	3.15	2.01	2.62	1.3
Cluster-Chr14-1	GH_D02G1192	15.7	18.34	14.57	15.46	8.57	13.9	9.68	56	8.82	9.83
Cluster-Chr14-1	GH_D02G1193	5.09	7.74	3.93	3.93	2.13	2.58	2.18	2.41	2.15	1.5
Cluster-Chr14-1	GH_D02G1194	27.95	24.56	21.79	16.62	21.07	16.55	21.97	11.88	17.04	9.11
Cluster-Chr14-1	GH_D02G1196	0.08	6.71	0	6.7	0	6.32	0.05	3.04	0	3.22
Cluster-Chr14-1	GH_D02G1199	2.02	9.18	1.2	2.88	0.65	1.11	0.55	1.15	0.7	1.19
Cluster-Chr14-1	GH_D02G1200	0	1.62	0	0.7	0.07	0.27	0	0.31	0	0.38
Cluster-Chr14-1	GH_D02G1204	0.09	0	0.18	0.01	1.94	0.04	3.37	0.39	0.11	0.72
Cluster-Chr14-1	GH_D02G1207	20.88	21.34	22.62	26.33	24.75	29.14	36.55	32.54	46.4	32.52
Cluster-Chr14-1	GH_D02G1214	9.12	9.57	4.64	5.88	4.07	4.05	2.67	0.86	2.34	1.24
Cluster-Chr14-1	GH_D02G1217	17.85	0.15	19.67	0.13	14.16	0.11	11.58	0.21	7.54	0.09
Cluster-Chr14-1	GH_D02G1218	20.42	16.31	18.25	10.58	14.09	10.28	15.24	8.79	23.45	21.39
Cluster-Chr14-1	GH_D02G1220	14.36	14.4	10.83	7.4	9.29	7.2	10.82	7.44	9.14	4.64
Cluster-Chr14-1	GH_D02G1222	0.99	1.42	6.95	2.97	3.06	0.41	0.77	0.15	1.03	0.29
Cluster-Chr14-1	GH_D02G1223	5.93	10.43	6	9.52	3.17	8	2.97	31.87	3.43	3.87
Cluster-Chr14-1	GH_D02G1226	6.34	7.33	3.16	2.38	1.24	1.31	0.35	0.49	0.85	0.4
Cluster-Chr14-1	GH_D02G1227	9.53	14	4.93	4.85	3.52	2.87	4.71	2.7	3.09	3.08
Cluster-Chr14-1	GH_D02G1228	0.85	1.04	334.22	41.74	246.3	43.02	385.12	67.52	304.47	31.51
Cluster-Chr14-1	GH_D02G1229	4.99	4.34	4.66	2.85	2.61	1.92	2.96	1.66	4	1.54
Cluster-Chr14-1	GH_D02G1231	48.97	49.74	48.99	61.93	44.6	65.46	49.08	49.95	28.82	38.16
Cluster-Chr14-1	GH_D02G1233	54.86	29.2	13.41	7.57	0.94	0.89	1.37	0.6	6.76	1.29
Cluster-Chr14-1	GH_D02G1235	4.39	3.53	1.02	0.81	0.15	0.31	0.24	0.32	0.7	0.31
Cluster-Chr14-1	GH_D02G1236	19.8	4.63	5.16	1.4	4.01	0.75	1.88	0.23	2.72	0.11
Cluster-Chr14-1	GH_D02G1237	0.04	0	1.3	0.66	0.44	2.21	0.97	9.25	1.64	4.61
Cluster-Chr14-1	GH_D02G1238	7.03	10.3	2.15	2.04	0.85	1.22	0.79	1.04	1.4	1.55
Cluster-Chr14-1	GH_D02G1239	28.97	5.46	49.71	1.91	54.69	2.79	42.94	1.22	33.5	2.34
Cluster-Chr14-1	GH_D02G1241	16.37	10.71	5.74	5.64	3.26	5.17	3.95	3.2	8.28	4.91
Cluster-Chr14-1	GH_D02G1242	3.83	3.55	0.41	0.32	0.06	0.02	0.01	0.04	0.19	0.07
Cluster-Chr14-1	GH_D02G1243	0.26	0.05	1.03	0.39	0.68	0.15	0.28	0.03	0.11	0.03
Cluster-Chr14-1	GH_D02G1246	4.59	0.8	0.57	0.21	0.26	0.26	0	0.03	0.17	0
Cluster-Chr14-1	GH_D02G1247	0	0.04	2.32	8.75	9.77	21.04	5.22	2.76	0.23	0.44
Cluster-Chr14-1	GH_D02G1250	8.99	6.26	25	13.71	27.47	11.26	12.85	2.37	4.89	1.15
Cluster-Chr14-1	GH_D02G1251	1.18	0.17	0.17	0.27	0.7	0.45	0.25	0	0.39	0.32
Cluster-Chr14-1	GH_D02G1252	15.52	16.49	9.8	9.12	8.17	8.62	5.62	4.13	5.31	3.99
Cluster-Chr14-1	GH_D02G1253	1.08	0.5	3.58	0.66	1.07	0.32	0.05	0	0.14	0
Cluster-Chr14-1	GH_D02G1254	15.08	14.4	39.74	41.01	24.33	26.89	13.47	3.92	4.37	1.44
Cluster-Chr14-1	GH_D02G1255	8.91	7.62	3.04	2.45	1.37	0.79	0.63	0.5	1.42	0.92
Cluster-Chr14-1	GH_D02G1256	3.77	1.8	2.32	1.57	1.63	1.21	1.55	0.33	1.36	0.41
Cluster-Chr14-1	GH_D02G1257	16.56	6.18	3.04	1.92	2.12	1.46	1.34	1.23	2.85	0.63
Cluster-Chr14-1	GH_D02G1258	9.35	2.47	1.51	1.09	1.39	0.42	0.41	0.34	0.65	0.16
Cluster-Chr14-1	GH_D02G1259	11.52	11.86	20.14	19.63	14.35	16.51	13.95	18.84	12.95	10.48
Cluster-Chr14-1	GH_D02G1260	7.09	8.94	1.66	1.75	0.78	0.56	0.15	0.95	0.67	0.55
Cluster-Chr14-1	GH_D02G1261	50.16	52.65	34.11	29.95	36.14	36.12	38.01	30.3	31.53	21.34
Cluster-Chr14-1	GH_D02G1263	9.26	7.5	6.97	4.82	5.03	4.4	5.89	3.33	3.32	1.81
Cluster-Chr14-1	GH_D02G1264	1.66	2.91	0.69	1.47	0.45	0.84	0.95	3.5	1.69	3.06
Cluster-Chr14-1	GH_D02G1265	17.41	21.13	7.36	9.14	2.7	5	5.8	11.21	14.79	8.54
Cluster-Chr14-1	GH_D02G1269	13.61	0.18	2.54	0.02	1.07	0.1	1.09	0.03	1.64	0
Cluster-Chr14-1	GH_D02G1272	54.46	66.85	32.66	13.48	63.06	7.56	57.67	0.84	10.01	0.32
Cluster-Chr14-1	GH_D02G1273	1.8	0	0.35	0	0.79	0	0.69	0	0.63	0
Cluster-Chr14-1	GH_D02G1274	8.54	15.28	7.6	12.52	5.58	13.55	9.57	23.47	9.54	16.22
Cluster-Chr14-1	GH_D02G1278	0.06	0.2	0.16	0.05	0.85	0.16	2.16	0.49	0.51	1
Cluster-Chr14-1	GH_D02G1283	12.56	25.15	3.67	4.29	3.39	2.72	1.69	1.44	5.43	2.84
Cluster-Chr14-1	GH_D02G1286	30.58	35.23	19.89	19.99	15.87	15.43	14.43	14.33	13.31	8.82
Cluster-Chr14-1	GH_D02G1287	5.79	4.51	7.72	6.41	6.66	7.19	5.25	4.59	6.97	4.13
Cluster-Chr14-1	GH_D02G1288	3.57	3.07	5.62	2.67	32.79	8.35	35.62	12.65	12.56	10.53
Cluster-Chr14-1	GH_D02G1291	5.04	4.02	1.72	2.09	1.68	1.11	1.21	4.9	0.72	0.19
Cluster-Chr14-1	GH_D02G1292	11.03	11.09	7.25	6.47	8.85	6.18	8.86	5.09	10.18	6.4
Cluster-Chr14-1	GH_D02G1293	0.13	0.27	2.74	1.47	0.13	0.08	0.45	0.3	0.21	0.06
Cluster-Chr14-1	GH_D02G1294	18.33	14.45	5.54	6.94	3.72	4.98	2.16	2.5	1.87	2
Cluster-Chr14-1	GH_D02G1295	17.89	16.97	15.08	13.25	10.79	10.42	9.51	9.73	7.94	3.59
Cluster-Chr14-1	GH_D02G1296	8.2	7.99	8.32	7.42	6.21	5.01	4.95	3.33	3.41	2.19
Cluster-Chr14-1	GH_D02G1302	6	5.48	6.51	6.47	4.34	6.84	7.01	6.5	6.96	7.2
Cluster-Chr14-1	GH_D02G1303	31.16	21.72	32.3	16.73	47.73	39.57	35.49	32.09	27.54	22.73
Cluster-Chr14-1	GH_D02G1304	1.54	1.22	0.23	0.17	0.09	0.04	0.05	0.04	0.08	0.32
Cluster-Chr14-1	GH_D02G1305	53.63	61.9	24.58	19.6	13.69	10.52	13.28	10.74	18.3	13.51
Cluster-Chr14-1	GH_D02G1306	15.15	15.41	233.81	241.45	257.1	308.19	63.23	46.98	7.77	1.78
Cluster-Chr14-1	GH_D02G1307	10.26	11.51	17.16	11.9	15.36	11.09	18.6	10.82	19.65	11.96
Cluster-Chr14-1	GH_D02G1309	0.72	1.11	0.43	0.16	0.46	0.64	0.24	0.6	0.43	0.41
Cluster-Chr14-1	GH_D02G1310	7.8	7.06	5.92	5.41	3.85	3.23	2.24	1.21	2.37	1.48
Cluster-Chr14-1	GH_D02G1311	1.53	2.26	4.37	4.07	11.71	7.53	8.94	5.48	2.49	2.71
Cluster-Chr14-1	GH_D02G1313	6.97	5.83	1.46	0.89	1.05	0.7	1.06	0.57	1.59	1.28
Cluster-Chr14-1	GH_D02G1314	6.49	7.63	2.94	3.17	1.95	2.52	1.62	1.82	1.08	1.18
Cluster-Chr14-1	GH_D02G1317	36.31	37.18	44.53	54.5	13.13	22.58	3.43	7.83	4.15	2.57
Cluster-Chr14-1	GH_D02G1320	12.83	11	11.94	12.83	9.83	13.13	9.15	13.19	7.72	9.1
Cluster-Chr14-1	GH_D02G1323	21.49	18.13	30.38	29.82	15.95	18.67	16.68	19.27	20.91	17.66
Cluster-Chr14-1	GH_D02G1324	8.37	8.88	2.25	4.49	0.91	1.44	0.71	0.62	0.5	0.7
Cluster-Chr14-1	GH_D02G1326	6.59	8.23	12.68	10.89	8.8	9.26	8.91	4.32	4.45	2.8
Cluster-Chr14-1	GH_D02G1328	0.41	0.31	0.61	0.31	0.05	0.02	0.11	0.06	1.18	0.54
Cluster-Chr14-1	GH_D02G1331	109.39	205.73	175.83	117.04	41.89	68.1	50.84	41.53	35.6	18.28
Cluster-Chr14-1	GH_D02G1332	23.47	27.46	30.84	30.73	14.76	19.29	19.87	15.49	13.76	12.57
Cluster-Chr14-1	GH_D02G1333	11.28	8.25	10.42	4.62	7.81	6.65	10.41	4.95	12.49	8.32
Cluster-Chr14-1	GH_D02G1335	45.09	50.03	37.19	29.05	30.91	27.84	28.59	20.43	27.1	23.75
Cluster-Chr14-1	GH_D02G1337	4.37	17.46	1.48	9.02	0.38	9.32	0.54	5.09	0.97	5.98
Cluster-Chr14-1	GH_D02G1339	7.1	11.15	7.12	6.76	4.27	6.02	4.5	4.83	3.88	4.61
Cluster-Chr14-1	GH_D02G1340	21.85	27.03	12.56	19.4	4.97	13.24	5.23	9.62	6.4	9.21
Cluster-Chr14-1	GH_D02G1341	36.85	54.92	23.44	30.15	18.47	37.37	18.32	26.24	12.93	26.28
Cluster-Chr14-1	GH_D02G1342	0.06	0	1.39	0.17	1.43	0	0.14	0.59	1.5	0.86
Cluster-Chr14-1	GH_D02G1343	6.1	6.71	3.01	4.86	2.2	3.04	5.13	14.43	4.13	6.33
Cluster-Chr14-1	GH_D02G1344	0.68	1.21	0.23	0.23	0	0	0	0.13	0.41	0
Cluster-Chr14-1	GH_D02G1346	0.72	2.61	2.59	2.2	2.4	2.37	1.46	2.16	2.61	4.57
Cluster-Chr14-1	GH_D02G1347	13.62	10.77	14.41	11.5	17.16	15.42	13.04	9.53	7.69	4.95
Cluster-Chr14-1	GH_D02G1348	4.44	6.19	1.42	1.34	0.63	0.4	1.96	1.54	3.94	2.18
Cluster-Chr14-1	GH_D02G1350	1.97	2.35	1.85	2.08	1.32	1.72	2.25	1.56	1.43	1.34
Cluster-Chr14-1	GH_D02G1353	14.86	14.01	24.73	30.05	24.41	29.55	20.96	21.05	14.21	14.71
Cluster-Chr14-1	GH_D02G1355	2.75	5.21	0.24	0.67	0.11	0.24	0.6	0.04	0.64	0.33
Cluster-Chr14-1	GH_D02G1356	4.58	8.08	3.36	3.28	2.17	1.99	1.35	1.33	0.96	0.58
Cluster-Chr14-1	GH_D02G1358	1.56	1.75	0.61	0.4	0.53	0.17	0.2	0.28	0.54	0.1
Cluster-Chr14-1	GH_D02G1360	3.14	0.61	3.73	1.21	0.34	0.12	0.53	0.06	0.51	0
Cluster-Chr14-1	GH_D02G1362	5.51	7.68	0.73	0.25	0	0.03	0	0	0.18	0
Cluster-Chr14-1	GH_D02G1363	0.38	1.73	2.19	1.1	0.18	0.37	0.36	0.45	1.6	0.98
Cluster-Chr14-1	GH_D02G1364	6.74	6.31	9.63	5.71	8.76	7.18	7.82	8.39	10.59	8.72
Cluster-Chr14-1	GH_D02G1372	4.77	3.61	2.51	1.2	0.21	0.36	0.22	0	0.17	0.03
Cluster-Chr14-1	GH_D02G1375	4.15	5.11	3.19	3.35	2.93	2.66	2.2	2.05	1.84	1.5
Cluster-Chr14-1	GH_D02G1379	12.65	10.08	2.98	2.75	2.12	0.65	3.56	0.99	2.99	2.07
Cluster-Chr14-1	GH_D02G1380	4.04	2.91	0.39	1.03	0.74	1.88	0.42	0.23	0.25	0.1
Cluster-Chr14-1	GH_D02G1381	6.07	4.69	3.71	2.03	2.72	1.91	1.47	0.79	1.78	0.63
Cluster-Chr14-1	GH_D02G1382	29.11	45.15	6.96	8.4	0.44	1.42	0.25	0.46	0.35	0.07
Cluster-Chr14-1	GH_D02G1383	0.54	0.21	2.51	1.23	0.24	0.09	0.84	0.18	2.93	4.93
Cluster-Chr14-1	GH_D02G1385	15.85	13.06	2.43	3.71	0.43	0.66	0.18	0.1	0.63	0.14
Cluster-Chr14-1	GH_D02G1386	0.61	0.6	1.38	1.52	1.93	2.22	0.98	0.91	0.65	0.36
Cluster-Chr14-1	GH_D02G1387	10.12	15.26	7.09	9.4	4.87	7.52	6.68	12.7	20.03	21.19
Cluster-Chr14-1	GH_D02G1388	0	0	0.07	0.37	11.76	18.45	5.06	17.15	0.63	0.9
Cluster-Chr14-1	GH_D02G1389	0.13	0.16	2.91	3.1	3.06	2.3	0.35	0.28	0.97	0.63
Cluster-Chr14-1	GH_D02G1391	3.86	4.1	9.15	9.15	7.96	8.43	5.29	9.39	5.14	3.73
Cluster-Chr14-1	GH_D02G1392	20.03	44.1	27.8	47.42	35.55	58.57	32.67	50.11	47.81	79.57
Cluster-Chr14-1	GH_D02G1393	1.05	1.35	0.72	1	0.56	0.54	0.23	0.22	0.2	0.12
Cluster-Chr14-1	GH_D02G1396	5.58	6.58	1.92	2.29	0.53	1.18	0.43	1.07	0.96	0.52
Cluster-Chr14-1	GH_D02G1398	11.24	6.22	2.74	1.54	1.47	1.03	1.88	1.31	2.34	1.14
Cluster-Chr14-1	GH_D02G1399	16.74	4.69	5.88	1.93	4.09	0.88	7.93	0.31	1.51	0.48
Cluster-Chr14-1	GH_D02G1401	2.78	2.09	3.68	4.49	2.87	3.79	3.28	4.31	3.91	7.73
Cluster-Chr14-1	GH_D02G1403	1.82	2.41	0.53	0.43	0.15	0.2	0.09	0.05	0.05	0.21
Cluster-Chr14-1	GH_D02G1404	2.46	1.73	0.25	0.22	0.18	0.18	0.15	0.25	0.39	0.26
Cluster-Chr14-1	GH_D02G1406	1.53	0.9	0.03	0	0	0	0	0	0	0
Cluster-Chr14-1	GH_D02G1408	7.63	6.57	4.6	3.36	2.73	2.87	3.91	2.85	3.67	1.57
Cluster-Chr14-1	GH_D02G1409	5.01	6.18	22.84	12.29	21.13	23.46	18.73	9.84	10.7	3.52
Cluster-Chr14-1	GH_D02G1410	15.29	17.09	11.93	11.33	10.7	13.63	10.98	7.48	10.99	7.56
Cluster-Chr14-1	GH_D02G1411	10.96	15.94	5.18	4.49	4.17	4.96	4.3	4.06	4.49	4.44
Cluster-Chr14-1	GH_D02G1412	13.34	14.47	19.89	23.44	10.57	18.01	10.3	11.81	7.4	8.12
Cluster-Chr14-1	GH_D02G1413	15.71	5.38	6.33	2.77	3.26	2.04	2.58	1.07	3.74	1.11
Cluster-Chr14-1	GH_D02G1414	1.45	3.08	1.92	2.09	0.08	0.33	0.84	0.34	2.32	0.85
Cluster-Chr14-1	GH_D02G1417	16.54	18.9	8.04	5.23	4.32	3.47	3.67	3.62	4.73	3.3
Cluster-Chr14-1	GH_D02G1419	17.46	13.48	10.5	6.45	9.26	7.26	8.69	4.05	4.29	2.84
Cluster-Chr14-1	GH_D02G1420	5.99	6.61	5.41	5.92	4.37	5.57	5.95	4.89	6.57	5.71
Cluster-Chr14-1	GH_D02G1422	1.13	1.14	0.15	0.23	0.07	0.23	0.35	0	0.27	0.18
Cluster-Chr14-1	GH_D02G1425	8.8	13.97	23.94	15.58	20.49	21.97	18.07	25.79	13.81	17.95
Cluster-Chr14-1	GH_D02G1426	2.64	2.01	1.03	0.96	0.87	0.05	0.49	0.06	0	0
Cluster-Chr14-1	GH_D02G1430	1.72	1.18	0.35	0.13	0.32	0.27	0.63	0.44	0.41	0.56
Cluster-Chr14-1	GH_D02G1432	1.25	1.41	0.61	1.18	0.4	0.75	0.18	0.05	0.17	0.08
Cluster-Chr14-1	GH_D02G1436	19.81	22.85	7.94	8.81	6.53	8.67	8.54	13.34	11.56	8.23
Cluster-Chr14-1	GH_D02G1437	20.73	18.12	9.99	10.77	4.96	5.22	6.05	5.16	5.76	4.01
Cluster-Chr14-1	GH_D02G1438	9.81	12.98	7.83	8.77	4.26	6.73	5.58	6.43	4.22	5.37
Cluster-Chr14-1	GH_D02G1439	16.09	23.81	7.2	4.68	5.73	3.13	12.53	9.38	7.96	7.25
Cluster-Chr14-1	GH_D02G1441	4.2	4.99	2.21	2.25	0.85	0.82	0.86	1.24	1.06	0.48
Cluster-Chr14-1	GH_D02G1442	1.11	0.76	0.33	0.24	0.15	0.24	0.09	0.08	0.17	0.02
Cluster-Chr14-1	GH_D02G1443	58.94	52.61	38.32	35.7	30.48	36.71	38.49	34	26.54	12.82
Cluster-Chr14-1	GH_D02G1445	11.57	18.33	4.13	5.12	0.61	1.32	0.49	0.45	1.54	1.38
Cluster-Chr14-1	GH_D02G1446	4.34	3.96	1.16	0.96	0.28	0.2	0.23	0.13	0.56	0.33
Cluster-Chr14-1	GH_D02G1450	10.12	9.81	10.74	11.91	13.4	10.49	11.77	4.54	6.95	7.51
Cluster-Chr14-1	GH_D02G1451	0.02	0.27	0.09	0.05	1.03	0.07	0.68	0.04	0.73	0.62
Cluster-Chr14-1	GH_D02G1453	309.1	194.82	128.47	59.39	266.83	120.57	374.54	91.86	474.52	117.74
Cluster-Chr14-1	GH_D02G1454	5.58	4.38	2.41	1.5	11.22	5.02	5.78	0.94	2.5	0.04
Cluster-Chr14-1	GH_D02G1458	13.7	18.57	13.42	20.04	7.27	15.85	4.94	7.76	6.17	7.94
Cluster-Chr14-1	GH_D02G1459	5.32	7.58	7.05	5.44	7.23	7.58	4.53	2.64	3.81	1.74
Cluster-Chr14-1	GH_D02G1460	1.27	0.33	3.62	0.17	5.79	0.55	1.57	0.39	0.34	0.06
Cluster-Chr14-1	GH_D02G1463	8.73	7.4	14.23	13.1	9.16	10.49	14.42	27.38	14.77	29.96
Cluster-Chr14-1	GH_D02G1464	19.07	15.23	3.82	2.97	0.71	0.13	0.4	0.11	0.74	0.04
Cluster-Chr14-1	GH_D02G1472	0.86	0.68	6.11	4.52	9.7	0.92	19.24	5.8	22.05	6.99
Cluster-Chr14-1	GH_D02G1473	48.29	49.53	16.03	14.48	10.89	9.58	9.01	7.55	11.25	8.06
Cluster-Chr14-1	GH_D02G1474	1.18	0.7	1.26	0.61	0.11	0.1	0.29	0	0.72	0.26
Cluster-Chr14-1	GH_D02G1475	1.47	0	1.45	0	0.85	0	0.46	0	0.77	0
Cluster-Chr14-1	GH_D02G1476	9.15	12.61	12.65	15.45	11.24	12.36	28.75	30.29	15.86	34.53
Cluster-Chr14-1	GH_D02G1477	1.64	1.79	0.91	1.78	1.09	2.67	1.69	1.35	5.37	3.04
Cluster-Chr14-1	GH_D02G1481	12.08	9.88	2.41	2.75	2.25	1.01	1.94	0.92	0.61	0.44
Cluster-Chr14-1	GH_D02G1482	19.2	19.86	9.56	6.89	6.4	5.16	4.96	2.35	4.69	1.91
Cluster-Chr14-1	GH_D02G1484	1.35	2.43	0.04	0	0	0	0	0	0.05	0
Cluster-Chr14-1	GH_D02G1486	7.21	4.3	3.38	3.52	8.6	9.06	3.26	2.92	2.87	1.85
Cluster-Chr14-1	GH_D02G1487	2.97	4.1	7.06	6.87	3.77	4.23	2.85	3.47	1.93	3.51
Cluster-Chr14-1	GH_D02G1488	4.89	6.25	5.77	6.07	3.45	3.96	2.77	2.82	1.76	0.85
Cluster-Chr14-1	GH_D02G1489	0.31	0.7	9.06	11.33	13.29	7.25	5.07	0.85	1.44	0.78
Cluster-Chr14-1	GH_D02G1490	24.42	17.86	33.04	23.69	19.57	24.84	12.34	13.53	16.22	12.13
Cluster-Chr14-1	GH_D02G1491	65.05	86.43	60.25	86.79	55.78	83.9	48.91	74.44	58.65	72.12
Cluster-Chr14-1	GH_D02G1492	2.73	3.77	0.66	1.28	0.59	0.27	0.8	0.38	0.29	0.48
Cluster-Chr14-1	GH_D02G1493	23.16	24.53	8.95	7.69	3.6	3.63	3.35	2.76	4.47	2.39
Cluster-Chr14-1	GH_D02G1495	0.04	0	0.01	0.03	0	0.06	0.02	0.08	0.74	1.26
Cluster-Chr14-1	GH_D02G1499	32.25	23.45	20.61	16.4	187.77	113.93	867.51	834.84	1096.4	1122.48
Cluster-Chr14-1	GH_D02G1500	3.1	0.89	4.06	1.38	2.02	0.36	2.31	0.08	0.94	0.09
Cluster-Chr14-1	GH_D02G1501	12.29	9.32	16.16	9.32	9.42	5.84	7.11	5.56	6.34	2.68
Cluster-Chr14-1	GH_D02G1503	13.39	6.43	1.98	1.53	0.31	0.31	0.54	0.15	0.6	0.3
Cluster-Chr14-1	GH_D02G1507	43.75	36.69	5.5	8.3	2.07	1.49	10.81	11.68	32.43	29.66
Cluster-Chr14-1	GH_D02G1508	0.37	0.5	0.51	0.41	0.99	0.19	3.18	7.76	9.39	7.59
Cluster-Chr14-1	GH_D02G1509	67.06	52.65	22.68	14.79	15.56	8.05	16.95	11.06	21.91	9.65
Cluster-Chr14-1	GH_D02G1511	4.5	5.2	0.66	2.73	0.64	5.36	0.31	0.54	0.67	0.64
Cluster-Chr14-1	GH_D02G1513	0.49	1.06	15.96	7.11	21.26	4.79	6.35	2.24	3.24	0.34
Cluster-Chr14-1	GH_D02G1515	14.39	12.68	10.86	11.19	8.86	8.05	4.7	3.27	3.34	1.75
Cluster-Chr14-1	GH_D02G1517	2.77	0.18	0.82	0.24	0.62	0.17	0.65	0.09	0.4	0.02
Cluster-Chr14-1	GH_D02G1519	5.47	4.7	16.82	15.64	23.66	19.58	21.23	18	12.67	13.37
Cluster-Chr14-1	GH_D02G1520	1.38	0	0.46	0	0.36	0	0.34	0	0.4	0
Cluster-Chr14-1	GH_D02G1521	21.43	25.19	23.49	24.87	15.08	19.92	10.49	9.46	6.59	7.43
Cluster-Chr14-1	GH_D02G1522	1.18	0.62	0.99	1.37	1.82	1.38	1.07	1.31	0.42	0.1
Cluster-Chr14-1	GH_D02G1524	7.27	6.37	4	3.67	4.06	2.85	3	1.92	2.55	1.43
Cluster-Chr14-1	GH_D02G1526	18.3	30.75	1.75	5.44	0.37	1.1	0.1	0.29	0.21	0.12
Cluster-Chr14-1	GH_D02G1527	26.29	26.46	12.88	13.66	11.49	12.17	13.71	10.57	13	11.22
Cluster-Chr14-1	GH_D02G1528	15.62	12.1	8.65	7.07	5.62	6.5	5.36	4.67	5.63	4.36
Cluster-Chr14-1	GH_D02G1531	17.24	0.82	20.71	2.55	15.16	2.44	16.98	2.58	17.18	2.05
Cluster-Chr14-1	GH_D02G1532	10.76	11.65	6.97	8.92	4.31	6.09	4.06	4.83	3.56	3.25
Cluster-Chr14-1	GH_D02G1533	8.12	8.83	8.64	14	5.88	8.29	5.06	3.28	3.64	4.36
Cluster-Chr14-1	GH_D02G1534	13.55	12.31	5.13	4.98	2.33	3.13	2.38	2.22	3.28	1.88
Cluster-Chr14-1	GH_D02G1536	1.63	1.13	0.91	0.13	1.66	0.19	0.55	0.53	0.27	0.03
Cluster-Chr14-1	GH_D02G1541	3.86	5.27	3.04	4.57	0.86	0.78	0	0.08	0.02	0.17
Cluster-Chr14-1	GH_D02G1542	4.16	5.01	4.84	4.62	10.42	7.31	19.03	5.59	12.04	7.29
Cluster-Chr14-1	GH_D02G1544	29.26	27.49	25.75	26.54	35.96	44.01	65.01	76.18	82.52	135.01
Cluster-Chr14-1	GH_D02G1545	4.89	2.47	1.78	1.9	1.32	2.02	26.63	213.3	78.36	392.94
Cluster-Chr14-1	GH_D02G1546	7.93	10.45	13.02	15.91	18.73	27.91	30.16	28.41	34.12	53.49
Cluster-Chr14-2	GH_D02G2243	0.85	3.31	0.31	1.5	0.85	3	5.69	4.71	11.34	18.48
Cluster-Chr14-2	GH_D02G2244	2.01	1.45	15.57	13.91	9.29	21.68	9.59	7.15	12.71	17.14
Cluster-Chr14-2	GH_D02G2245	8.29	12.66	1.86	1.78	0.42	0.26	1.43	1.65	12.16	8.8
Cluster-Chr14-2	GH_D02G2246	1.69	2.89	0.86	1.93	2.31	2	4.17	1.94	1.3	1.61
Cluster-Chr14-2	GH_D02G2247	12.55	13.01	7.95	5.79	5.41	4.03	5.25	1.42	2.89	1.67
Cluster-Chr14-2	GH_D02G2248	3.18	5.18	1.5	1.35	3.33	3.85	4.52	3.31	3.06	5.62
Cluster-Chr14-2	GH_D02G2249	7.83	3.76	1.55	0.76	1.5	0.6	3.76	5.98	6.46	6.63
Cluster-Chr14-2	GH_D02G2250	0.31	0.2	0	0.11	0.05	0	0.99	1.44	1.24	1.23
Cluster-Chr14-2	GH_D02G2251	0.79	0.2	1.69	1	0.1	0.07	0.62	0.26	2.97	2.92
Cluster-Chr14-2	GH_D02G2252	4.9	5.89	1.52	2.51	1.2	1.71	4.31	3.53	4.84	6.38
Cluster-Chr14-2	GH_D02G2253	22.25	22.53	9.1	8.8	11.01	8.76	33.03	9.67	39.9	15.52
Cluster-Chr14-2	GH_D02G2254	13.17	9.44	1054.15	2083.11	3594.66	3402.91	3537.97	3962.43	4982.65	6435.77
Cluster-Chr14-2	GH_D02G2255	0.18	0.21	0.16	0.23	0.4	0.4	12.11	13.54	55.98	23.02
Cluster-Chr14-2	GH_D02G2257	4.36	6.54	4.95	6.86	6.24	8.76	7.16	10.83	8.38	10.64
Cluster-Chr14-2	GH_D02G2259	20.77	27.8	25.61	23.48	28.78	33.42	37.57	38.02	30.93	46.59
Cluster-Chr14-2	GH_D02G2261	10.83	14.16	9	7.64	6.19	8.12	6.32	5.57	6.57	6.29
Cluster-Chr14-2	GH_D02G2262	9.87	9.52	31.34	26.43	9.03	11.47	0.93	0.57	1.72	0.61
Cluster-Chr14-2	GH_D02G2264	6.84	7.72	5.35	4.62	3.51	3.33	2.84	2.65	2.55	2.63
Cluster-Chr14-2	GH_D02G2265	6.84	8.16	2.9	3.81	2.93	2.15	2.43	1.81	2.96	1.48
Cluster-Chr14-2	GH_D02G2267	0	0	0	0.01	0.01	0.03	0.05	0	1.55	3.11
Cluster-Chr14-2	GH_D02G2268	0.18	0.14	0.06	0.3	0.01	0.03	0	0.05	0.4	1.32
Cluster-Chr14-2	GH_D02G2269	2.72	2.94	0.05	0.46	0	0	0	0.02	0	0
Cluster-Chr14-2	GH_D02G2271	1.18	3.62	0.03	0.54	0	0.07	0.04	0.24	0.1	0.35
Cluster-Chr14-2	GH_D02G2272	3.07	0.73	1.59	4.97	0.42	3.05	0.31	1.83	0.24	0.38
Cluster-Chr14-2	GH_D02G2273	11.65	10.26	6.63	4.23	3.23	3.39	3.4	2.59	3.24	2.97
Cluster-Chr14-2	GH_D02G2274	0	0	0	0	0.1	0.07	0.39	0.07	13.07	12.48
Cluster-Chr14-2	GH_D02G2275	9.59	7.32	9.52	8.64	6.46	8.21	5.61	4.76	3.17	2.2
Cluster-Chr14-2	GH_D02G2276	9.66	8.21	15.46	2.76	9.45	1.31	7.94	0.44	4.35	0.55
Cluster-Chr14-2	GH_D02G2277	6.17	7.78	4.95	5.64	3.43	3.36	1.48	0.79	1.5	1.31
Cluster-Chr14-2	GH_D02G2278	24.14	7.22	6.84	1.75	6.62	1.46	4.81	1.88	2.97	1.32
Cluster-Chr14-2	GH_D02G2279	21	20.21	2.95	3.16	0.34	0.94	0.17	0.46	0.94	0.66
Cluster-Chr14-2	GH_D02G2280	1.14	0.67	0.08	0.14	0	0.03	0	0	0	0.07
Cluster-Chr14-2	GH_D02G2281	9.38	11.31	7.27	6.45	5.95	6.29	4.06	3.82	3.35	3.52
Cluster-Chr14-2	GH_D02G2282	3.26	1.78	11.16	7.97	13.47	14.46	10.62	4.15	6.57	1.8
Cluster-Chr14-2	GH_D02G2283	14.49	6.7	35.78	35.42	42.14	39.25	5.33	2.29	4.35	0.93
Cluster-Chr14-2	GH_D02G2285	26.82	24.1	11.45	11.8	4.33	3.63	0.64	0.44	0.61	0.38
Cluster-Chr14-2	GH_D02G2286	16.25	13.02	8.83	5.89	13.92	12.52	17.39	8.75	10.61	10.35
Cluster-Chr14-2	GH_D02G2287	156.77	196.24	129.47	130.59	77.79	99	79.27	53.61	76.22	46.28
Cluster-Chr14-2	GH_D02G2288	26.53	26.71	21.53	17.41	12.46	14.09	11.74	10.91	15.47	10.01
Cluster-Chr14-2	GH_D02G2289	12.64	13.23	3.39	3.99	0.49	1.17	0.17	0.19	1.35	0.57
Cluster-Chr14-2	GH_D02G2290	7.09	6.13	1.24	1.14	0.09	0.03	0.07	0.05	0.71	0.05
Cluster-Chr14-2	GH_D02G2291	70.79	79.52	65.66	81.22	72.87	126.28	97.53	79.05	69.8	102.52
Cluster-Chr14-2	GH_D02G2294	2.19	2.86	0.2	0.3	0.36	0.34	0.67	1.5	1.13	0.54
Cluster-Chr17-1	GH_D03G1744	12.71	14.58	9.38	8.71	18.77	12.15	4.48	1.96	4.61	1.57
Cluster-Chr17-1	GH_D03G1745	0.55	0.51	0.42	0.24	1.24	0.12	0.41	0.11	0.16	0.06
Cluster-Chr17-1	GH_D03G1746	47.88	46.47	90.25	112.05	51.36	66.5	21.55	21.61	16.98	23.22
Cluster-Chr17-1	GH_D03G1747	51.11	50.18	429.54	609.2	523.03	778.8	424.36	811.78	286.24	536.25
Cluster-Chr17-1	GH_D03G1749	2.14	0.28	0.98	0.08	0.83	0.04	0.67	0.1	0.31	0.02
Cluster-Chr17-1	GH_D03G1751	0.76	1.66	0.32	0.74	0.24	0.15	0.13	0.12	0.12	0.06
Cluster-Chr17-1	GH_D03G1752	1.21	1.91	1.05	0.71	2.24	0.81	1.74	0.64	0.66	0.47
Cluster-Chr17-1	GH_D03G1754	12.15	17.14	7.64	11.78	4.69	3.98	6.2	17	33.08	36.37
Cluster-Chr17-1	GH_D03G1758	12.05	9.92	14.51	10.16	14	14.03	16.29	13.36	13.8	17.62
Cluster-Chr17-1	GH_D03G1762	7.51	29.54	2.5	1.48	0.92	0.34	0.53	0.06	0.08	0.03
Cluster-Chr17-1	GH_D03G1763	2.97	1.67	0.17	0.37	0.04	0.18	0.26	0.23	0.61	0.6
Cluster-Chr17-1	GH_D03G1764	11.12	9.04	6.91	6.2	9.87	9.85	10.62	11.24	12.24	6.66
Cluster-Chr17-1	GH_D03G1766	3.95	5.76	1.78	1.63	0.77	0.75	1.01	1.02	1.38	0.96
Cluster-Chr17-1	GH_D03G1768	0.32	0.9	4.32	7.64	1.74	11.52	0.31	1.23	0.33	4.05
Cluster-Chr17-1	GH_D03G1769	0.02	0	1.25	0.08	0.31	0.24	0.06	0	0.03	0
Cluster-Chr17-1	GH_D03G1774	0.09	2.11	0.99	1.27	0.21	1.62	0.03	0.33	0.03	0.36
Cluster-Chr17-1	GH_D03G1776	0.15	0.44	2.59	8.29	4.13	18.26	0.33	2.26	0.65	8.12
Cluster-Chr17-1	GH_D03G1777	0.08	0	1.92	4.01	1.84	6.92	0.36	1.15	0.27	1.04
Cluster-Chr17-1	GH_D03G1778	0.21	0.14	120.98	99.16	61.8	62.12	17.78	17.1	1.35	0.88
Cluster-Chr17-1	GH_D03G1781	20.46	18.3	8.47	7.28	5.94	4.19	5.37	3.47	6.21	3.34
Cluster-Chr17-1	GH_D03G1782	2.04	2.02	0.89	0.99	0.47	0.37	1.48	1.03	1.72	1.15
Cluster-Chr17-1	GH_D03G1783	0.15	0.08	0.07	1.01	0.36	1.49	0.11	0.07	0.22	0.16
Cluster-Chr17-1	GH_D03G1784	9.78	7.57	3.97	2.64	2.05	1.01	1.6	0.72	1.68	0.99
Cluster-Chr17-1	GH_D03G1785	17.09	18.22	57.22	23.56	40.31	40.96	55.01	49.56	26.05	28.88
Cluster-Chr17-1	GH_D03G1786	8.85	1.4	1.87	0.28	0.76	0.03	0.91	0.2	1.61	0.2
Cluster-Chr17-1	GH_D03G1787	26.43	22.5	6.56	4.7	0.75	0.51	0.15	0.14	0.25	0.05
Cluster-Chr17-1	GH_D03G1789	5.56	3.86	5.04	3.22	10.77	6.12	9.4	3.52	7.41	1.82
Cluster-Chr17-1	GH_D03G1790	16.34	12.86	9.31	9.1	67.3	22.06	142.81	133.35	142.55	63.8
Cluster-Chr17-1	GH_D03G1791	9.19	7.85	7.1	4.32	5.27	1.86	17.66	9.4	12.38	6.75
Cluster-Chr17-1	GH_D03G1792	7.18	0.82	2.42	1.18	1.22	0.1	2.26	0.45	6.84	0.21
Cluster-Chr17-1	GH_D03G1794	1.74	6.67	1.73	1.17	0.74	0.35	0.3	0.22	0.77	0.1
Cluster-Chr17-1	GH_D03G1796	29.16	31.37	51.92	35.67	54.45	60.23	100.24	102.42	83.06	109.31
Cluster-Chr17-1	GH_D03G1798	11.37	5.84	28.18	13.29	35.56	17.51	38.9	19.77	22.79	12.03
Cluster-Chr17-1	GH_D03G1799	0.2	0	0.19	0.23	0.93	0.16	2.46	0.09	0.48	0.13
Cluster-Chr17-1	GH_D03G1804	1.16	3.38	0.95	1.36	0.69	1.14	0.43	1.39	0.44	1.79
Cluster-Chr17-1	GH_D03G1805	2.86	10.91	1.2	1.59	0.11	0.55	0.64	0.92	0.78	2.48
Cluster-Chr17-1	GH_D03G1807	2.19	2.85	0.47	0.67	1.02	1.59	1.91	5.19	4.49	4.48
Cluster-Chr17-1	GH_D03G1809	1.07	2.14	1.95	1.73	1.78	2.79	1.14	1.81	1.1	1.48
Cluster-Chr17-1	GH_D03G1813	53.02	44.79	75.55	61.92	82.81	97.75	111.05	91.37	67.98	64.36
Cluster-Chr17-1	GH_D03G1814	1.06	0.71	9.96	1.97	17.4	7.08	13.07	5.98	11.29	2.47
Cluster-Chr17-1	GH_D03G1815	1.75	1.83	0.92	0.73	2.69	1.23	0.67	0.2	0.43	0.05
Cluster-Chr17-1	GH_D03G1816	8.02	7.22	14.86	11.85	12.76	8.8	10.71	5.9	10.59	6.24
Cluster-Chr17-1	GH_D03G1817	0.16	0.05	2.88	0.12	3.93	0.36	0.81	0.11	0.09	0
Cluster-Chr17-1	GH_D03G1818	4.34	1.13	5.67	2.97	2.49	0.96	0.34	0.16	0.09	0.04
Cluster-Chr17-1	GH_D03G1819	8.23	8.02	15.49	16.62	11.26	10.01	11.07	5.86	6.93	4.79
Cluster-Chr17-1	GH_D03G1820	8.25	7.02	1.76	1.61	0.33	0.18	1.77	1.03	0.83	0.41
Cluster-Chr17-1	GH_D03G1821	31.21	30.44	24.1	23.46	14.35	16.95	9.65	10.2	12.36	10.82
Cluster-Chr17-1	GH_D03G1822	2.2	1.98	11.74	3.01	0.21	0.15	0.29	0.13	1.2	0.84
Cluster-Chr17-1	GH_D03G1824	2.13	15.8	1.7	13.93	1.99	20.01	2.85	13.57	3.98	37.73
Cluster-Chr17-1	GH_D03G1825	24.41	27.75	3.48	5.71	3.21	1.95	1.62	0.66	1.45	0.91
Cluster-Chr17-1	GH_D03G1826	4.94	6.95	4.4	5.59	7.64	9.45	7.3	3.99	3.79	2.41
Cluster-Chr17-1	GH_D03G1827	28.6	18.54	32.77	28.33	44.9	51.78	45.55	11.21	10.32	1.29
Cluster-Chr17-1	GH_D03G1828	7.39	7.01	2.98	2.06	2.06	1.61	2.31	0.66	1.38	0.38
Cluster-Chr17-1	GH_D03G1829	7.63	6.67	9.62	14	9.33	16.29	10.35	8.84	7.85	6.91
Cluster-Chr17-1	GH_D03G1830	0.93	3.49	0.39	0.34	0	0	0.07	0.02	0.05	0
Cluster-Chr17-1	GH_D03G1831	3.76	5.67	0.72	1.22	0.84	0.7	0.55	0.58	0.76	0.48
Cluster-Chr17-1	GH_D03G1832	11.51	11.11	8.48	5.8	7.19	4.07	7.16	5.68	9.3	5.15
Cluster-Chr17-1	GH_D03G1833	0	0	1.64	0.48	0.02	0.05	0.03	0	0.19	0.06
Cluster-Chr17-1	GH_D03G1834	2.91	2.06	22.29	22.19	21.59	16.76	14.1	8.47	9.39	2.29
Cluster-Chr17-1	GH_D03G1836	7.36	8.7	3.89	3.54	2.19	2.07	2.61	2.62	2.24	2.12
Cluster-Chr17-1	GH_D03G1837	2.28	0.67	0.63	0.29	0.24	0.58	0.3	2.04	0.41	0.13
Cluster-Chr17-1	GH_D03G1839	1.04	0.5	0.21	0.19	0.07	0.38	0.11	0.79	0.21	0.13
Cluster-Chr17-1	GH_D03G1841	1.69	0.4	0.34	0.16	0.18	0.35	0.12	0.72	0.22	0.03
Cluster-Chr17-1	GH_D03G1843	5.49	5.65	3.92	2.94	1.77	2.67	2.23	1.47	2.43	1.59
Cluster-Chr17-1	GH_D03G1844	13	32.06	2.2	4.34	0.32	0.35	0.16	0.09	0.3	0.1
Cluster-Chr17-1	GH_D03G1845	0.71	1.21	0.45	0.33	1.49	0.11	2.14	0.51	1.42	0.59
Cluster-Chr17-1	GH_D03G1846	4.7	4.5	0.51	0.68	0.02	0.1	0.06	0.04	0.19	0.1
Cluster-Chr17-1	GH_D03G1848	7.32	9.15	3.22	3.43	2.57	2.23	2.14	2.1	2.38	1.59
Cluster-Chr17-1	GH_D03G1849	7.01	9.79	2.04	3	3.37	3.21	1.9	2.75	0.89	1.35
Cluster-Chr17-1	GH_D03G1850	9.85	7.85	3.36	1.7	1.72	0.77	1.25	0.59	1.49	0.42
Cluster-Chr17-1	GH_D03G1851	19.65	27.39	8.29	8.49	4.03	7.53	4.51	5.99	5.98	5.08
Cluster-Chr17-1	GH_D03G1855	9.5	5.69	3.82	2.03	2.28	2.7	2.63	2.38	2.44	1.97
Cluster-Chr17-1	GH_D03G1858	7.65	7.85	7.2	6.01	9.37	8.09	7.07	5.74	4.05	2.81
Cluster-Chr17-1	GH_D03G1860	15.12	3.01	2	1.99	4.73	1.54	6.12	3.55	1.38	0.77
Cluster-Chr17-1	GH_D03G1861	9.49	11.34	5.42	5.09	3.47	4.41	3.72	6	4.86	7.14
Cluster-Chr17-1	GH_D03G1864	1.09	1.16	0.05	0.12	0.03	0	0.05	0.02	0.32	0.07
Cluster-Chr17-1	GH_D03G1867	23.56	18.19	11.88	7.53	7.96	1.63	3.17	0.74	4.92	1.46
Cluster-Chr17-1	GH_D03G1868	0.38	1.43	12.49	11.13	11.74	22.82	6.19	13.55	7.3	26.33
Cluster-Chr17-1	GH_D03G1869	8.04	12.78	6.29	8.56	6.05	7.4	3.66	2.47	2.6	1.77
Cluster-Chr17-1	GH_D03G1870	30.24	32.79	36.24	40.96	34.11	43.23	43.61	41.88	25.79	33.53
Cluster-Chr17-1	GH_D03G1872	11.93	0.74	6.58	0.35	0.05	0.1	0.03	0.21	0.15	0.13
Cluster-Chr17-1	GH_D03G1876	0	1.78	0	0.27	0	0.11	0	0	0	0
Cluster-Chr17-1	GH_D03G1877	17.65	21.71	12.91	15.63	8.91	14.58	4.79	8.78	4.22	4.17
Cluster-Chr17-1	GH_D03G1878	39.93	38.91	18.21	15.16	19.48	12.77	17.44	14.78	16.79	11.17
Cluster-Chr17-1	GH_D03G1880	4.73	3.53	5.98	2.16	3.61	2.01	7.24	3.05	5.44	1.9
Cluster-Chr17-1	GH_D03G1881	4.04	20.1	6.95	14.62	5.19	16.66	5.92	13.24	4.42	8.47
Cluster-Chr17-1	GH_D03G1882	14.36	24.53	64.6	41.71	91.33	59.75	50.12	43.09	16.46	12.28
Cluster-Chr17-1	GH_D03G1883	21.31	17.14	4.47	2.91	3.15	1.38	0.89	0.41	1.26	0.46
Cluster-Chr17-1	GH_D03G1884	21.66	28.47	21.44	20.89	17.69	24	15.76	19.36	14.32	15.15
Cluster-Chr17-1	GH_D03G1885	1.8	1.28	10.18	3.39	1.51	2.35	1.45	7.14	0.55	1.92
Cluster-Chr17-1	GH_D03G1886	4.46	5.35	3.36	4.19	3.9	3.7	2.57	1.62	1.92	1.02
Cluster-Chr17-1	GH_D03G1887	8.15	10.61	52.73	60.96	89.65	69.06	56.19	55	38.12	56.88
Cluster-Chr17-1	GH_D03G1888	3.71	2.41	1.84	1.63	2.79	2.29	3.07	2.21	4.33	4.17
Cluster-Chr17-1	GH_D03G1889	42.45	44.07	12.15	8.34	6	4.98	6.34	3.44	8.32	3.66
Cluster-Chr17-1	GH_D03G1891	4.41	13.72	1.13	3.05	0.12	0.42	0.17	0.34	1.2	0.65
Cluster-Chr17-1	GH_D03G1895	5.99	4.52	4.02	4.13	4.35	2.92	3.62	2.08	3.03	2.49
Cluster-Chr17-1	GH_D03G1897	11.67	10.64	7.04	6.15	4.19	3.9	4.55	3.26	5.26	4.24
Cluster-Chr17-1	GH_D03G1900	17.94	21.05	36.55	47.12	34.83	31.36	51.65	50.73	40.43	40.91
Cluster-Chr17-1	GH_D03G1904	19.47	18.31	43.44	39.81	35.93	44.05	28.8	22.78	21.34	18.25
Cluster-Chr17-1	GH_D03G1905	2.5	3.7	4.64	0.86	11.17	0.37	4.23	0.18	1.6	0.12
Cluster-Chr17-1	GH_D03G1907	18.94	15.29	5.89	5.56	7.37	5.32	5.57	3.76	7.32	3.92
Cluster-Chr17-1	GH_D03G1908	13.24	12.56	4.78	3.78	2.6	3.63	3.63	2.73	3.51	2.12
Cluster-Chr17-1	GH_D03G1910	1.94	3.75	0.79	0.94	0.21	0.28	0.42	0.48	1	2.08
Cluster-Chr17-1	GH_D03G1911	31.22	27.39	36.56	36.49	44.1	42.72	39.79	46.9	43.55	48.8
Cluster-Chr17-1	GH_D03G1912	16.92	14.71	25.48	17.64	28.12	17.42	21.41	7.94	14.7	12.24
Cluster-Chr17-1	GH_D03G1915	1.15	4.52	0.12	0.52	0.04	0.26	0	0.04	0	1.33
Cluster-Chr17-1	GH_D03G1916	3.25	4.54	3.58	2.52	0.87	1.91	2.56	4.14	6.25	14.7
Cluster-Chr17-1	GH_D03G1919	7.65	6.19	2.18	1.09	0.83	0.31	0.34	0	0.09	0.11
Cluster-Chr17-1	GH_D03G1920	9.37	6.65	11.05	7.82	8.89	8.69	11.55	10.64	11.9	7.43
Cluster-Chr17-1	GH_D03G1922	6	8.89	2.63	3.63	2.38	0.6	1.64	0.09	2.51	0.27
Cluster-Chr17-1	GH_D03G1924	5.84	11.58	27.84	38.75	5.13	17.08	0.33	0.87	0.24	0.36
Cluster-Chr17-1	GH_D03G1925	11.91	12.76	3.46	4.56	1.28	2.14	1.13	0.63	1.71	0.8
Cluster-Chr17-1	GH_D03G1927	57.11	66.77	96.72	87.73	107.18	115.7	106.14	94.47	65.86	89.25
Cluster-Chr17-1	GH_D03G1928	2.6	2.9	0.52	0.48	0.4	0.1	0.16	0.03	0.14	0.22
Cluster-Chr17-1	GH_D03G1929	8.22	10.58	9.45	12.66	10.41	15.75	10.25	8.32	4.93	5.41
Cluster-Chr17-1	GH_D03G1930	7.67	6.53	7.98	6.53	2.77	2.24	0.43	0.71	0.67	0.05
Cluster-Chr17-1	GH_D03G1933	46.94	60.63	3.78	6.96	0.7	1.36	0.13	0.23	0.33	0.1
Cluster-Chr17-1	GH_D03G1934	47.04	59.25	7.73	18.88	3.98	6.98	0.3	0.35	0.42	0.18
Cluster-Chr17-1	GH_D03G1936	5.2	6.46	1.77	2.1	0.71	0.85	1.37	0.96	1.77	0.93
Cluster-Chr17-1	GH_D03G1938	9.92	11.59	9.17	13.4	11.29	10.22	4.43	2.3	1.73	1.57
Cluster-Chr17-1	GH_D03G1939	4.52	0.16	9.15	0.89	8.22	0.51	9.56	0.9	3.51	0.39
Cluster-Chr17-1	GH_D03G1940	3.16	5.98	1.66	2.19	1.63	1.79	0.95	1.84	2.26	1.48
Cluster-Chr17-1	GH_D03G1941	5.96	6.13	5.53	5.69	5.4	6.26	7.07	8.37	6.51	8.06
Cluster-Chr17-1	GH_D03G1942	11.07	14.9	9.38	18.57	7.86	8.68	5.11	7.01	6.2	4.82
Cluster-Chr17-1	GH_D03G1943	42.52	51.21	23.61	26.75	19.87	24.2	25.4	26.18	23.92	20.24
Cluster-Chr17-1	GH_D03G1944	2.84	1.5	1.03	0.73	0.97	0.36	0.63	0.71	1.47	0.48
Cluster-Chr17-1	GH_D03G1945	9.84	13.38	6.63	9.34	5.93	10.85	4.67	5.19	3.31	5.58
Cluster-Chr17-1	GH_D03G1946	8.31	7.61	14.75	14.84	13.85	13.47	12.56	10.32	6.12	8.28
Cluster-Chr17-1	GH_D03G1947	2.2	2.37	2.15	1	0.82	0.51	0.78	1.39	3.13	3.12
Cluster-Chr22-1	GH_D04G0041	14.27	15.98	31.18	34.52	30.46	36.19	34.11	34.79	33.29	37.39
Cluster-Chr22-1	GH_D04G0042	3.79	2.85	0.45	0.22	0.21	0	0.13	0.26	0.73	0.18
Cluster-Chr22-1	GH_D04G0043	1.96	1.44	0.33	0.45	0.19	0.11	0.31	0	0.3	0.07
Cluster-Chr22-1	GH_D04G0044	10.08	8.25	2.11	2.89	3.19	2.04	8.33	9.57	8.96	4.65
Cluster-Chr22-1	GH_D04G0045	12.08	14.66	8.46	8.68	4.41	6.62	7.33	8.24	4.34	6.61
Cluster-Chr22-1	GH_D04G0046	2.19	0.77	0.65	0.11	0.45	0	0.73	0	0.74	0.36
Cluster-Chr22-1	GH_D04G0047	9.01	38.28	8.76	91.06	6.71	48.67	6.93	8.32	3.69	7.99
Cluster-Chr22-1	GH_D04G0048	3.17	3.81	2.25	3.24	1.89	1.83	1.24	0.72	0.72	0.84
Cluster-Chr22-1	GH_D04G0050	16.24	14.56	19.28	17.79	17.92	13.3	16.38	12.78	12.24	8.56
Cluster-Chr22-1	GH_D04G0053	7.88	11.32	4.41	5.49	3.86	4.96	3.3	4.67	3.97	3.11
Cluster-Chr22-1	GH_D04G0054	1.13	1.72	4.52	3.46	5.37	4.71	6.47	5.79	6.65	7.61
Cluster-Chr22-1	GH_D04G0055	9.21	10.7	7.95	7.71	5.33	6.86	5.62	5.48	4.57	3.36
Cluster-Chr22-1	GH_D04G0057	22.89	24.43	13.42	9.03	4.56	5.56	3.82	2.43	5.07	2.84
Cluster-Chr22-1	GH_D04G0058	10.42	11.7	3.68	3.82	1.99	2.39	1.36	1.25	1.24	0.79
Cluster-Chr22-1	GH_D04G0059	15.96	16.43	29.29	32.4	21.7	28.78	23.53	20.77	11.51	10.89
Cluster-Chr22-1	GH_D04G0060	1.26	2.27	2.47	2.6	1.47	2.05	2.11	2.09	2.16	1.95
Cluster-Chr22-1	GH_D04G0062	8.22	10.44	3.16	5.17	2.97	4.36	1.61	0.8	1.79	0.16
Cluster-Chr22-1	GH_D04G0064	41.12	39.99	69.38	62.38	90.5	99.38	108.17	82.11	71.1	48.84
Cluster-Chr22-1	GH_D04G0065	8.97	9.49	9.24	9.22	11.29	11.07	11.22	11.63	11.18	17.75
Cluster-Chr22-1	GH_D04G0066	11.05	20.38	8.17	14.44	4.9	16.96	4.88	9.29	2.69	6.34
Cluster-Chr22-1	GH_D04G0067	36.71	34.95	79.39	84.52	306.84	775.33	200.97	186.98	14.6	16.41
Cluster-Chr22-1	GH_D04G0069	14.36	17.36	1.9	2.25	0.15	0.1	0.18	0.07	0.24	0.08
Cluster-Chr22-1	GH_D04G0071	20.3	23.1	6.69	6.82	3.79	3.14	3.22	2.81	4.36	3.43
Cluster-Chr22-1	GH_D04G0072	9.88	10.16	16.93	17.77	19.19	16.99	21.82	16.03	17.21	15.14
Cluster-Chr22-1	GH_D04G0073	2.89	2.7	1.52	1.73	0.76	0.96	1.23	1.24	1.52	2.37
Cluster-Chr22-1	GH_D04G0075	12.7	10.88	2.9	3.36	1.96	2.21	1.88	1.82	1.35	0.74
Cluster-Chr22-1	GH_D04G0076	11.21	11.32	16.71	22.19	14.43	16.77	11.86	10.38	7.41	6.75
Cluster-Chr22-1	GH_D04G0077	3.32	3.6	2.16	2.49	1.27	1.7	1.03	1.33	1.13	0.44
Cluster-Chr22-1	GH_D04G0079	12.57	13.53	27.46	31.69	27.52	32.97	29.3	30.41	25.75	24.21
Cluster-Chr22-1	GH_D04G0081	9.93	16.49	10.26	9.06	6.44	10.15	6.01	4.91	3.33	1.96
Cluster-Chr22-1	GH_D04G0082	1.61	0.95	0.19	0.08	0.25	0.11	0.27	0	0.04	0
Cluster-Chr22-1	GH_D04G0083	1.84	1.67	0.23	1.01	0.81	0.35	0.42	0.09	0.16	0.28
[truncated: 188 more rows]
