# Supplementary material for: Identification of Candidate Genes for Lint Percentage and Fiber Quality Through QTL Mapping and Transcriptome Analysis in an Allotetraploid Interspecific Cotton CSSLs Population
Source: Front Plant Sci. 2022 Apr 29;13:882051. doi: 10.3389/fpls.2022.882051 (PMC9100888; doi:10.3389/fpls.2022.882051)
Supplement: Supplementary Table S10 — GO annotation information of candidate genes in QTL for each trait. [file Table_10.XLSX]

## Sheet: Sheet1
Table S16 Putative candidate genes within the intervals of the stable QTL.
QTL	Additive effecta	Gene ID	Module	MMb	K.inc	Arabidopsis homologue	Annotation	CCRI35_0DPA_ovule	Pima S-7_0DPA_ovule	CCRI35_8DPA_fiber	Pima S-7_8DPA_fiber	CCRI35_18DPA_fiber	Pima S-7_18DPA_fiber	CCRI35_25DPA_fiber	Pima S-7_25DPA_fiber	CCRI35_32DPA_fiber	Pima S-7_32DPA_fiber
qFE-Chr15-1	-	GH_D01G0066	black	-0.877	61.608	AT2G15695	Protein of unknown function DUF829, transmembrane 53	6.48	8.2	3.02	6.59	1.2	9.27	1.08	8.88	1.96	8.72
qFE-Chr15-1	-	GH_D01G0133	black	0.861	67.567	AT3G20000	translocase of the outer mitochondrial membrane 40	27.63	10.84	34.91	9.62	29.15	8.06	21.48	3.61	12.05	1.9
qFE-Chr15-1	-	GH_D01G0077	blue	0.949	256.956	AT1G49750	Leucine-rich repeat (LRR) family protein	4.97	0.55	1.07	0.12	0.31	0.09	0.2	0.04	0.63	0.07
qFE-Chr15-1	-	GH_D01G0190	blue	0.93	303.873	AT1G03760	Prefoldin chaperone subunit family protein	14.03	9.81	5.57	3.27	3.1	2.1	3.75	2.38	3.54	2.04
qFE-Chr15-1	-	GH_D01G0067	blue	0.955	370.337	AT3G19184	AP2/B3-like transcriptional factor family protein	10.37	4.3	0.95	0.79	0.02	0.16	0.08	0.04	0.02	0.02
qFE-Chr15-1	-	GH_D01G0095	cyan	0.889	37.842	AT3G19640	magnesium transporter 4	35.83	32.22	40.51	28.25	48.77	34.39	52.87	33.86	40.8	25.47
qFE-Chr15-1	-	GH_D01G0049	cyan	0.921	44.07	AT3G24550	proline extensin-like receptor kinase 1	0.92	1.66	0.25	0.33	3.67	1.51	5.88	0.38	1.96	0.44
qFE-Chr15-1	-	GH_D01G0089	grey60	0.87	34.743	AT2G14740	vaculolar sorting receptor 3	16.77	18.86	33.23	40.74	19.81	40.79	25.03	28.97	14.69	23.52
qFE-Chr15-1	-	GH_D01G0134	grey60	0.874	36.124	-	-	2.94	4.67	3.09	7.74	3.85	10.39	1.04	3.15	0.68	2.22
qFE-Chr15-1	-	GH_D01G0191	lightcyan	0.943	62.928	AT4G28380	Leucine-rich repeat (LRR) family protein	0	0	0.14	0.2	0.37	0.56	18.83	0.6	251.95	0.25
qFE-Chr15-1	-	GH_D01G0099	lightcyan	0.96	63.595	AT1G47530	MATE efflux family protein	0	0	0.03	0.11	0.14	0.21	5.54	1.01	68.12	0.71
qFE-Chr15-1	-	GH_D01G0080	lightyellow	0.906	39.412	AT4G35220	Cyclase family protein	9.52	8.74	18.47	10.04	6.65	7.21	6.38	4.6	4.36	4.42
qFE-Chr15-1	-	GH_D01G0158	midnightblue	0.845	35.982	AT2G20840	Secretory carrier membrane protein (SCAMP) family protein	0.34	0.06	5.99	2.13	8.25	4.01	4.71	1.15	1.97	0.46
qFL-Chr06-1	+	GH_A06G1019	black	-0.923	84.41	AT5G25770	alpha/beta-Hydrolases superfamily protein	3.16	12.33	3.45	13.5	1.43	15.2	1.55	13.18	1.29	9.74
qFL-Chr06-1	+	GH_A06G1669	black	0.944	91.92	AT3G14130	Aldolase-type TIM barrel family protein	32.39	0.16	48.79	0.14	56.93	0.22	41.03	0.53	25.52	0.65
qFL-Chr06-1	+	GH_A06G1216	black	0.949	92.052	AT1G80860	phospholipid N-methyltransferase	10.5	0	13.96	0	9.17	0.08	13.61	0.19	9.06	0.06
qFL-Chr06-1	+	GH_A06G1625	blue	0.96	269.059	AT1G80245	Spc97 / Spc98 family of spindle pole body (SBP) component	15.12	5.52	6.5	2.05	1.78	1.29	2.83	0.36	3.86	1
qFL-Chr06-1	+	GH_A06G1037	blue	0.951	355.558	AT2G20740	Tetraspanin family protein	6.17	2.88	0.9	0.86	0.26	0.21	0.11	0.03	0.35	0.07
qFL-Chr06-1	+	GH_A06G1710	blue	0.958	362.307	AT4G04890	protodermal factor 2	71.91	33.73	16.76	7.61	1.97	1.38	0.78	0.19	0.69	0.12
qFL-Chr06-1	+	GH_A06G1674	darkgreen	0.863	24.106	AT3G14280	unknown protein; Has 51 Blast hits to 51 proteins in 13 species: Archae - 0; Bacteria - 0; Metazoa - 0; Fungi - 0; Plants - 51; Viruses - 0; Other Eukaryotes - 0 (source: NCBI BLink).	0	0.12	0.31	0.5	2.83	5.89	0.11	0.31	0	0
qFL-Chr06-1	+	GH_A06G1420	darkgreen	0.903	29.128	AT4G18910	NOD26-like intrinsic protein 1;2	0.38	0.82	0.62	9.28	3.99	21.51	3.72	10.29	5.06	3.55
qFL-Chr06-1	+	GH_A06G1088	darkgreen	0.943	35.704	AT1G15750	Transducin family protein / WD-40 repeat family protein	1.87	3.87	7.16	22.43	10.27	39.95	9.28	16.84	3.39	4.98
qFL-Chr06-1	+	GH_A06G1052	darkred	0.86	21.5	AT2G24240	BTB/POZ domain with WD40/YVTN repeat-like protein	3.27	3.05	3.78	2.39	5.84	2.95	7.33	5.23	7.36	3
qFL-Chr06-1	+	GH_A06G1618	darkred	0.876	25.044	AT1G30270	CBL-interacting protein kinase 23	17.98	0.25	15.93	0.24	13.36	0.27	25.74	1.31	44.21	5.68
qFL-Chr06-1	+	GH_A06G0977	darkred	0.874	27.107	AT4G32940	gamma vacuolar processing enzyme	27.76	31.91	61.11	42.5	165.4	115.92	290.16	156.36	262.86	123.19
qFL-Chr06-1	+	GH_A06G0995	darkturquoise	0.833	20.866	AT5G11650	alpha/beta-Hydrolases superfamily protein	8.28	6.98	12.99	10.43	12.9	17.78	18.53	45.08	17.21	22.61
qFL-Chr06-1	+	GH_A06G1720	darkturquoise	0.874	24.394	AT4G21780	unknown protein; Has 30201 Blast hits to 17322 proteins in 780 species: Archae - 12; Bacteria - 1396; Metazoa - 17338; Fungi - 3422; Plants - 5037; Viruses - 0; Other Eukaryotes - 2996 (source: NCBI BLink).	0.74	1.54	0.31	0.61	0.05	0.76	0.39	7.01	0.43	2.83
qFL-Chr06-1	+	GH_A06G1118	darkturquoise	0.869	25.298	AT3G06880	Transducin/WD40 repeat-like superfamily protein	0.9	2.35	0.46	4.28	0.93	4.59	2.1	11.01	3.77	5.79
qFL-Chr06-1	+	GH_A06G1378	grey60	0.894	40.716	AT1G11340	S-locus lectin protein kinase family protein	1.04	2.52	1.81	7.09	2.12	6.36	3.5	1.81	0.48	0.21
qFL-Chr06-1	+	GH_A06G1686	grey60	0.928	51.926	AT1G59740	Major facilitator superfamily protein	0.04	0.02	0.33	11.52	1.45	7.09	0.23	1.62	0.2	0.49
qFL-Chr06-1	+	GH_A06G1301	grey60	0.948	56.457	AT5G24850	cryptochrome 3	4.29	6.89	10.9	20.09	8.55	19.55	5.46	6.92	4.04	3.96
qFL-Chr06-1	+	GH_A06G1551	lightcyan	0.875	46.637	AT4G28500	NAC domain containing protein 73	0.22	0.17	0.81	0.43	1.12	0.19	11.93	4.17	24.23	11.09
qFL-Chr06-1	+	GH_A06G1427	lightcyan	0.922	52.064	AT1G28240	Protein of unknown function (DUF616)	7.62	7.1	4.08	2.83	3.85	2.52	5.87	3.18	20.65	10.27
qFL-Chr06-1	+	GH_A06G1526	lightcyan	0.933	61.373	AT2G42760	unknown protein; CONTAINS InterPro DOMAIN/s: Protein of unknown function DUF1685 (InterPro:IPR012881); Has 170 Blast hits to 164 proteins in 34 species: Archae - 0; Bacteria - 1; Metazoa - 26; Fungi - 10; Plants - 107; Viruses - 0; Other Eukaryotes - 26 (source: NCBI BLink).	0.68	0.04	0.7	0.5	1.28	1.09	12.8	8.3	37.03	16.89
qFL-Chr06-1	+	GH_A06G1728	lightyellow	0.847	33.057	AT1G61900	unknown protein; FUNCTIONS IN: molecular_function unknown; INVOLVED IN: biological_process unknown; LOCATED IN: anchored to plasma membrane, plasma membrane, anchored to membrane; EXPRESSED IN: 23 plant structures; EXPRESSED DURING: 13 growth stages; BEST Arabidopsis thaliana protein match is: unknown protein (TAIR:AT2G30700.1); Has 65 Blast hits to 65 proteins in 12 species: Archae - 0; Bacteria…	41.8	40.67	64.76	52.53	45.52	51.39	26.33	21.65	21.41	8.29
qFL-Chr06-1	+	GH_A06G1053	lightyellow	0.956	54.81	AT2G24230	Leucine-rich repeat protein kinase family protein	16.97	16.39	41.53	26.69	4.01	2.41	0.57	0.11	0.46	0.13
qFL-Chr06-1	+	GH_A06G1348	magenta	0.928	93.729	AT5G44550	Uncharacterised protein family (UPF0497)	0.51	0.3	0.04	0.03	0	0	0.08	0.04	0.68	4.63
qFL-Chr06-1	+	GH_A06G1762	magenta	0.92	97.83	AT4G22160	unknown protein; Has 30201 Blast hits to 17322 proteins in 780 species: Archae - 12; Bacteria - 1396; Metazoa - 17338; Fungi - 3422; Plants - 5037; Viruses - 0; Other Eukaryotes - 2996 (source: NCBI BLink).	5.65	7.18	3.34	7.8	5.41	8.59	15.77	42.66	28.13	70.64
qFL-Chr06-1	+	GH_A06G1334	magenta	0.941	100.742	AT1G30760	FAD-binding Berberine family protein	1.23	2.83	0.84	0.53	0.13	0.12	0.29	0.19	5.29	20.29
qFL-Chr06-1	+	GH_A06G1295	midnightblue	0.831	29.414	AT4G31290	ChaC-like family protein	3.02	3.17	8.5	4.64	11.72	7.91	7.24	4.49	5.34	2.4
qFL-Chr06-1	+	GH_A06G1791	midnightblue	0.847	33.015	AT5G47560	tonoplast dicarboxylate transporter	1.54	2.01	2.46	1.78	9.17	8.79	2.1	0.34	1.3	0.47
qFL-Chr06-1	+	GH_A06G1266	orange	0.977	228.712	AT1G34220	Regulator of Vps4 activity in the MVB pathway protein	2.14	14.84	0.62	4.73	0.58	2.05	0.15	1.99	0.19	0.76
qFL-Chr06-1	+	GH_A06G1265	orange	0.982	240.26	AT5G38830	Cysteinyl-tRNA synthetase, class Ia family protein	1.86	11.65	0.54	2.5	0.22	1.56	0.21	1.31	0.24	1.5
qFL-Chr06-1	+	GH_A06G1557	orange	0.971	243.271	-	-	4.83	11.2	1.19	2.55	0.54	2.23	0.14	1.45	0.83	1.54
qFL-Chr06-1	+	GH_A06G1733	royalblue	0.903	32.849	AT1G11840	glyoxalase I homolog	130.21	95.67	423.66	221.81	333.18	217.97	229.21	74.41	60.71	12.71
qFL-Chr06-1	+	GH_A06G1735	royalblue	0.897	34.682	AT4G22010	SKU5 similar 4	8.27	2.25	19.11	0.41	34.64	0.22	10	0.19	2.03	0.11
qFL-Chr08-1	-	GH_A08G0560	black	0.927	79.507	AT2G04520	Nucleic acid-binding, OB-fold-like protein	8.44	0.94	9.88	0.4	13.16	0.47	10.4	0.42	9.69	0.48
qFL-Chr08-1	-	GH_A08G0730	black	0.963	99.606	AT1G03150	Acyl-CoA N-acyltransferases (NAT) superfamily protein	9.57	0	13.18	0.23	9.19	0.3	12.17	0.08	11.3	0.09
qFL-Chr08-1	-	GH_A08G0890	blue	0.952	340.932	-	-	11.66	7.28	4.83	2.85	2.98	2.56	1.9	1.81	2.86	1.01
qFL-Chr08-1	-	GH_A08G1171	blue	0.94	344.076	AT3G61850	Dof-type zinc finger DNA-binding family protein	6.95	4.11	1.32	0.89	0.41	0.08	0.41	0.12	1.1	0.53
qFL-Chr08-1	-	GH_A08G1046	blue	0.963	344.946	AT5G53420	CCT motif family protein	23.67	9.95	6	1.38	0.67	0.18	0.67	0.36	1.84	0.58
qFL-Chr08-1	-	GH_A08G1036	cyan	0.884	38.495	AT2G23810	tetraspanin8	30.06	29.52	30.54	34.01	73.09	46.82	81.13	42.9	67.14	41.36
qFL-Chr08-1	-	GH_A08G0625	darkgreen	0.828	17.918	AT5G47030	ATPase, F1 complex, delta/epsilon subunit	13.12	21.48	20.7	29.45	20.63	36.1	16.92	25.57	11.62	18.12
qFL-Chr08-1	-	GH_A08G0498	darkgreen	0.847	20.738	AT4G02900	ERD (early-responsive to dehydration stress) family protein	0.2	0.38	0.13	0.03	1.37	3.35	0.33	0.43	0.12	0.12
qFL-Chr08-1	-	GH_A08G0643	darkgreen	0.926	31.128	AT3G60280	uclacyanin 3	5.74	0.59	43.01	56.45	66	177.07	35.55	95.36	23.05	37.04
qFL-Chr08-1	-	GH_A08G0781	darkred	0.91	31.317	AT1G48910	Flavin-containing monooxygenase family protein	0.53	0.47	0.4	0.18	0.14	0.16	5.21	0.94	3.62	0.3
qFL-Chr08-1	-	GH_A08G0995	darkred	0.958	38.413	AT5G34940	glucuronidase 3	12.75	0.9	97.69	7.54	113.07	12.15	349.79	54.27	464.81	26.8
qFL-Chr08-1	-	GH_A08G0595	darkred	0.957	39.591	AT2G44500	O-fucosyltransferase family protein	0.08	0.09	0.22	0.21	3.99	6.06	64.96	12.58	66.54	7.35
qFL-Chr08-1	-	GH_A08G0948	darkturquoise	0.82	18.778	AT5G11380	1-deoxy-D-xylulose 5-phosphate synthase 3	16.32	23.61	8.15	9.6	9.85	10.69	11.81	47.79	14.84	6.91
qFL-Chr08-1	-	GH_A08G0653	darkturquoise	0.923	31.814	AT4G33355	Bifunctional inhibitor/lipid-transfer protein/seed storage 2S albumin superfamily protein	0	0	0	0.19	0	0.62	0.42	3.18	0	0.15
qFL-Chr08-1	-	GH_A08G0996	darkturquoise	0.958	42.707	AT1G15690	Inorganic H pyrophosphatase family protein	10.42	9.75	29.95	13.02	22.24	19.36	36.11	258.1	43.36	51.34
qFL-Chr08-1	-	GH_A08G0671	grey60	0.92	47.204	AT2G42430	lateral organ boundaries-domain 16	0.68	0.31	0.65	9.06	0.34	10.7	0.17	1.2	0	0.21
qFL-Chr08-1	-	GH_A08G1024	grey60	0.959	60.106	AT4G30850	heptahelical transmembrane protein2	0.47	2.36	0.92	15.14	2.12	14.05	0.97	1.25	0.65	1.07
qFL-Chr08-1	-	GH_A08G0735	lightcyan	0.926	56.827	AT3G63120	cyclin p1;1	5.72	4.3	13.94	2.58	8.5	1.4	23.06	15.15	54.27	19.82
qFL-Chr08-1	-	GH_A08G1192	lightcyan	0.928	58.111	AT1G57680	FUNCTIONS IN: molecular_function unknown; INVOLVED IN: biological_process unknown; LOCATED IN: endomembrane system; EXPRESSED IN: 24 plant structures; EXPRESSED DURING: 15 growth stages; CONTAINS InterPro DOMAIN/s: Uncharacterised conserved protein UCP031277 (InterPro:IPR016971); Has 35333 Blast hits to 34131 proteins in 2444 species: Archae - 798; Bacteria - 22429; Metazoa - 974; Fungi - 991; Pl…	0.1	0.41	0.06	0.07	0.33	0.16	0.37	0.59	5.41	0.59
qFL-Chr08-1	-	GH_A08G1147	lightcyan	0.965	65.775	AT4G01100	adenine nucleotide transporter 1	1.23	0.69	0.84	0.21	0.65	0.06	2.54	0.26	7.57	3
qFL-Chr08-1	-	GH_A08G1198	lightyellow	0.862	32.598	AT4G00730	Homeobox-leucine zipper family protein / lipid-binding START domain-containing protein	11.71	18.63	29.83	22.66	22.16	15.55	16.52	7.64	7.96	4.63
qFL-Chr08-1	-	GH_A08G0793	magenta	0.897	80.696	AT5G23660	homolog of Medicago truncatula MTN3	0.17	0.21	0.96	1.67	0.07	1.43	0.79	2.91	1.42	70.87
qFL-Chr08-1	-	GH_A08G1121	magenta	0.929	96.893	AT4G32530	ATPase, F0/V0 complex, subunit C protein	14.69	10.29	18.11	11.07	16.38	13.65	27.86	28.61	22.29	65.1
qFL-Chr08-1	-	GH_A08G0958	magenta	0.937	97.765	AT4G25760	glutamine dumper 2	0.77	2.43	1.92	1.29	0.04	0.14	0.26	3.16	0.68	22.37
qFL-Chr08-1	-	GH_A08G0692	midnightblue	0.832	29.103	AT3G63430	unknown protein; BEST Arabidopsis thaliana protein match is: unknown protein (TAIR:AT1G74160.1); Has 135 Blast hits to 119 proteins in 22 species: Archae - 0; Bacteria - 2; Metazoa - 3; Fungi - 3; Plants - 119; Viruses - 0; Other Eukaryotes - 8 (source: NCBI BLink).	8.28	14.73	2.48	2.89	43.26	25.02	23.83	10.72	3.27	1.29
qFL-Chr08-1	-	GH_A08G0990	midnightblue	0.856	38.104	AT2G12646	PLATZ transcription factor family protein	0.42	0.07	0.73	0.09	3.92	1.48	0.13	0.71	0	0.13
qFL-Chr08-1	-	GH_A08G0766	midnightblue	0.852	38.518	-	-	0.18	0.27	1.38	0.07	10.77	2.09	1.78	0.08	0.12	0
qFL-Chr08-1	-	GH_A08G0531	orange	0.98	235.874	AT3G25110	fatA acyl-ACP thioesterase	5.68	23.55	1.63	8.34	0.23	5.57	0.03	0.84	0.36	1.7
qFL-Chr08-1	-	GH_A08G0970	orange	0.983	265.603	AT4G25770	alpha/beta-Hydrolases superfamily protein	2.96	7.22	1.7	2.26	0.98	1.21	0.84	1.14	1.08	1.18
qFL-Chr08-1	-	GH_A08G0602	orange	0.987	270.065	AT5G01110	Tetratricopeptide repeat (TPR)-like superfamily protein	4.55	15.68	1.4	2.82	0.91	1.14	0.52	0.61	1.26	0.87
qFL-Chr08-1	-	GH_A08G1222	royalblue	0.884	34.096	AT5G23940	HXXXD-type acyl-transferase family protein	43.91	13.04	363.42	50.38	206.87	20.92	14.11	1.27	2.45	0.65
qFL-Chr08-2	-	GH_A08G1772	blue	0.915	315.064	AT5G08560	transducin family protein / WD-40 repeat family protein	11.59	8.03	2.72	1.84	1.87	0.97	1.57	1.15	1.53	0.66
qFL-Chr08-2	-	GH_A08G1520	blue	0.922	320.924	AT2G46270	G-box binding factor 3	30.74	20.75	7.08	3.65	1.49	0.78	1.95	0.6	5.34	2.07
qFL-Chr08-2	-	GH_A08G1545	blue	0.978	381.197	AT2G45650	AGAMOUS-like 6	23.18	8.1	2.87	1.42	0.58	0.03	0.53	0.03	1.5	0.27
qFL-Chr08-2	-	GH_A08G1589	cyan	0.825	25.729	AT1G01500	Erythronate-4-phosphate dehydrogenase family protein	8.09	8.6	7.88	10.53	13.88	10.7	16.17	8.65	13.54	9.07
qFL-Chr08-2	-	GH_A08G1850	darkgreen	0.868	23.128	AT1G17020	senescence-related gene 1	1.83	1.02	2.48	2.02	4.11	11.42	5.73	2.78	1.66	0.29
qFL-Chr08-2	-	GH_A08G1681	darkred	0.858	22.958	AT3G63470	serine carboxypeptidase-like 40	0.28	0.13	10.22	0.6	18.03	1.4	20.51	3	28.76	2.29
qFL-Chr08-2	-	GH_A08G1744	darkred	0.97	41.184	AT4G19370	Protein of unknown function (DUF1218)	0	0.05	0	0.04	1.01	0.7	11.3	2.35	16.53	1.57
qFL-Chr08-2	-	GH_A08G1654	darkturquoise	0.866	23.788	AT1G02120	GRAM domain family protein	10.61	13.5	9.27	12.42	12.17	17.48	18.29	28.35	13.43	20.93
qFL-Chr08-2	-	GH_A08G1713	darkturquoise	0.9	28.58	AT3G08500	myb domain protein 83	0	0	0.07	0	0.04	0.36	0.4	3.29	0.18	0.18
qFL-Chr08-2	-	GH_A08G1536	darkturquoise	0.941	36.402	AT2G46150	Late embryogenesis abundant (LEA) hydroxyproline-rich glycoprotein family	0	0.08	0.46	0.66	0.73	1.56	0.19	6.27	0	1.01
qFL-Chr08-2	-	GH_A08G1564	grey60	0.94	50.413	AT4G00660	RNAhelicase-like 8	10.39	14.95	19.51	31.23	9.27	26.97	9.08	18.64	7.95	13.58
qFL-Chr08-2	-	GH_A08G1771	magenta	0.897	84.047	AT1G32100	pinoresinol reductase 1	0.19	0.14	0.04	0.35	0	0	0.08	0.05	1.47	22.54
qFL-Chr08-2	-	GH_A08G1662	magenta	0.936	98.552	AT2G44740	cyclin p4;1	0.09	0.58	0.07	0.49	0	0.13	0.19	0.08	0.08	6.86
qFL-Chr08-2	-	GH_A08G1404	magenta	0.981	125.297	AT1G02930	glutathione S-transferase 6	0.28	0.29	0.87	0.76	0.06	0.2	0.11	1.03	4.19	13.82
qFL-Chr08-2	-	GH_A08G1775	orange	0.958	214.779	AT1G80480	plastid transcriptionally active 17	6.6	14.62	4.28	6.27	2.59	5.32	2.35	3.51	1.96	2.04
qFL-Chr08-2	-	GH_A08G1785	orange	0.943	229.034	AT1G31930	extra-large GTP-binding protein 3	13.48	24.05	3.92	8.33	0.65	1.72	0.4	0.81	0.49	1.08
qFL-Chr08-2	-	GH_A08G1822	orange	0.956	229.073	AT1G10000	Ribonuclease H-like superfamily protein	6.21	18.23	1.1	4.6	0	0.36	0.18	0.36	0.54	0.33
qFL-Chr08-2	-	GH_A08G1875	royalblue	0.856	25.18	AT5G47060	Protein of unknown function (DUF581)	13.71	8.76	38.05	17.87	26.78	6.22	10.45	0.43	2.31	1.13
qFL-Chr12-1	+	GH_A12G2328	black	-0.851	52.373	AT5G47070	Protein kinase superfamily protein	0.02	3.69	0	4.62	0.04	4.18	0.08	8.63	0.08	3.58
qFL-Chr12-1	+	GH_A12G2168	black	0.879	64.208	AT5G07590	Transducin/WD40 repeat-like superfamily protein	12.59	6.13	14.56	4.11	9.93	4.34	11.15	6.93	10.52	4.42
qFL-Chr12-1	+	GH_A12G1856	black	0.899	70.759	AT3G47810	Calcineurin-like metallo-phosphoesterase superfamily protein	6.29	3.87	6.63	1.75	5.69	1	6.14	1.54	6.5	1.99
qFL-Chr12-1	+	GH_A12G2093	blue	0.945	352.236	AT4G19570	Chaperone DnaJ-domain superfamily protein	129.31	79.21	26.81	15.68	11.95	6.48	12.48	7.94	23.91	7.74
qFL-Chr12-1	+	GH_A12G2265	blue	0.971	356.923	AT2G35500	shikimate kinase like 2	10.51	2.72	1.09	0.41	0.15	0.12	0.21	0.1	0.4	0.11
qFL-Chr12-1	+	GH_A12G2368	blue	0.968	373.819	AT4G16650	O-fucosyltransferase family protein	30.92	15.31	7.43	3.68	3.43	0.95	1.86	0.33	2.85	0.43
qFL-Chr12-1	+	GH_A12G2495	cyan	0.825	23.93	AT5G41350	RING/U-box superfamily protein	2.79	3.7	2.58	1.58	5.68	3.7	6.07	2.55	4.14	2.6
qFL-Chr12-1	+	GH_A12G2063	cyan	0.816	24.783	AT1G67750	Pectate lyase family protein	0.19	0.39	0.92	1.34	11.54	7.23	21.4	12.08	3.45	0.22
qFL-Chr12-1	+	GH_A12G2035	cyan	0.886	41.602	AT5G60830	basic leucine-zipper 70	0	0	0.15	0.11	11.61	0.9	9.73	0.61	1.65	0.25
qFL-Chr12-1	+	GH_A12G2159	darkgreen	0.885	27.443	AT5G07440	glutamate dehydrogenase 2	5.78	6.41	8.08	20.62	9.92	31.07	10.53	19.87	8.28	9.23
qFL-Chr12-1	+	GH_A12G2285	darkred	0.86	23.796	AT4G17890	ARF-GAP domain 8	3.19	2.67	6.14	3.57	10.07	4.38	14.47	7.39	16.93	9.79
qFL-Chr12-1	+	GH_A12G2428	darkred	0.906	29.537	AT1G12430	armadillo repeat kinesin 3	9.37	6.67	6.26	1.72	8.52	2.5	15.24	7.37	24.47	2.82
qFL-Chr12-1	+	GH_A12G2186	darkred	0.945	35.557	AT3G47420	phosphate starvation-induced gene 3	0.6	0.3	0.48	0.22	0.26	0.12	5.49	0.06	5.35	0.07
qFL-Chr12-1	+	GH_A12G1932	darkturquoise	0.939	34.36	AT1G74780	Nodulin-like / Major Facilitator Superfamily protein	4.71	8.88	0.7	2.84	2.3	7.88	5.58	27.55	4.37	10.49
qFL-Chr12-1	+	GH_A12G1933	darkturquoise	0.938	34.466	AT1G74780	Nodulin-like / Major Facilitator Superfamily protein	1.49	1.69	0.58	1.61	3.39	7.1	3.93	14.32	1.94	2.62
qFL-Chr12-1	+	GH_A12G2390	darkturquoise	0.921	34.941	AT4G22590	Haloacid dehalogenase-like hydrolase (HAD) superfamily protein	1.37	2.02	0.88	1.37	2.88	1.64	25.06	83.5	21.81	11.95
qFL-Chr12-1	+	GH_A12G2500	grey60	0.871	38.243	AT4G11150	vacuolar ATP synthase subunit E1	6.36	5.21	19.19	30.88	12.71	29.28	13.31	19.8	10.73	11.75
qFL-Chr12-1	+	GH_A12G1872	grey60	0.883	40.389	AT1G25480	Aluminium activated malate transporter family protein	11	27.2	92.35	329.67	104.92	365.93	103.53	264.46	51.89	95.14
qFL-Chr12-1	+	GH_A12G1805	grey60	0.91	42.662	AT1G13770	Protein of unknown function, DUF647	3.99	5.84	7.51	10.61	4.64	9.51	3.91	6.61	3.06	4.43
qFL-Chr12-1	+	GH_A12G2002	lightcyan	0.9	50.849	AT5G58750	NAD(P)-binding Rossmann-fold superfamily protein	0.14	0.09	0.12	0.28	0.07	0.33	2.64	0.63	14.87	0.3
qFL-Chr12-1	+	GH_A12G2382	lightcyan	0.919	56.812	AT1G62710	beta vacuolar processing enzyme	0.16	0.13	0.62	0.5	0.24	0.48	12.65	8.2	31.62	10.36
qFL-Chr12-1	+	GH_A12G2032	lightcyan	0.945	61.944	AT1G74100	sulfotransferase 16	1.43	2	0.13	0.19	0	0.04	1.42	0	11.99	0
qFL-Chr12-1	+	GH_A12G1925	lightyellow	0.868	36.749	AT4G16340	guanyl-nucleotide exchange factors;GTPase binding;GTP binding	16.19	21.01	24.95	23.22	14.31	18.61	11.68	12.48	11.78	10.6
qFL-Chr12-1	+	GH_A12G2029	lightyellow	0.919	42.938	AT5G60920	COBRA-like extracellular glycosyl-phosphatidyl inositol-anchored protein family	19.76	18.06	79.21	56.32	26.48	36.6	19.06	13.14	20.11	6.64
qFL-Chr12-1	+	GH_A12G2438	lightyellow	0.939	48.942	AT4G37740	growth-regulating factor 2	11.62	10.87	37.04	14.51	5.97	3.26	0.4	0.22	0.21	0.04
qFL-Chr12-1	+	GH_A12G1843	magenta	0.948	105.142	AT2G02990	ribonuclease 1	0.09	0.14	0.76	0.53	0.12	0.12	0.13	0.82	1.62	17.32
qFL-Chr12-1	+	GH_A12G1908	magenta	0.944	106.422	AT3G25640	Protein of unknown function, DUF617	1.54	3.67	0.59	1.24	0.27	0.47	1.92	16.36	41.41	70.31
qFL-Chr12-1	+	GH_A12G2455	magenta	0.972	120.87	AT1G11260	sugar transporter 1	0.02	0.02	0	0.01	0.06	0	0.07	0.01	2.08	9.75
qFL-Chr12-1	+	GH_A12G1994	midnightblue	0.867	37.922	AT5G07800	Flavin-binding monooxygenase family protein	0.76	0.47	1.3	0.83	14.2	10.35	2.15	2.06	1.44	1.55
qFL-Chr12-1	+	GH_A12G1883	midnightblue	0.929	54.028	AT1G13310	Endosomal targeting BRO1-like domain-containing protein	7.69	7.64	18.04	13.85	31.37	23.62	23.97	13.77	9.57	9.21
qFL-Chr12-1	+	GH_A12G1852	midnightblue	0.97	63.566	AT1G69690	TCP family transcription factor	2.95	0.93	9.49	4.06	44.24	19.03	15.97	4.83	0.72	0.32
qFL-Chr12-1	+	GH_A12G2388	orange	0.946	223.619	AT4G12420	Cupredoxin superfamily protein	6.33	13.59	0.85	2.53	0.9	2.05	0	0.07	0.15	0
qFL-Chr12-1	+	GH_A12G2129	orange	0.939	224.339	AT5G23690	Polynucleotide adenylyltransferase family protein	12.61	20.51	5.03	8.23	2.85	4.19	2.24	2.7	3.33	2.3
qFL-Chr12-1	+	GH_A12G2339	orange	0.974	262.528	AT2G22740	SU(VAR)3-9 homolog 6	27.39	78.51	5.25	8.88	0.28	0.33	0.19	0.18	0.26	0.12
qFL-Chr12-1	+	GH_A12G2298	royalblue	0.875	31.293	AT4G17970	aluminum-activated, malate transporter 12	1.27	1.35	8.91	0.26	20.76	0.74	9.13	0.1	0.9	0.25
qFL-Chr14-1	+	GH_D02G0269	black	-0.955	94.871	AT3G25040	endoplasmic reticulum retention defective 2B	6.88	22.54	5.06	20.37	7.56	21.11	6.49	21.61	8.32	26.2
qFL-Chr14-1	+	GH_D02G0288	black	0.954	95.463	AT3G24160	putative type 1 membrane protein	3.7	2.2	10.29	0.75	9.65	0.8	10.67	0.38	9.03	0.19
qFL-Chr14-1	+	GH_D02G0336	black	0.976	107.052	AT3G23600	alpha/beta-Hydrolases superfamily protein	18.32	2.19	35.84	0.99	30.61	0.63	32.68	0.36	24.47	0.62
qFL-Chr14-1	+	GH_D02G0311	blue	0.906	101.683	AT5G22355	Cysteine/Histidine-rich C1 domain family protein	6.03	0.05	2.52	0.05	1.15	0.01	0.7	0.02	0.7	0.02
qFL-Chr14-1	+	GH_D02G0310	blue	0.941	260.833	AT5G22355	Cysteine/Histidine-rich C1 domain family protein	4.16	1.15	1.75	0.52	0.44	0.1	0.04	0.04	0.49	0.03
qFL-Chr14-1	+	GH_D02G0302	blue	0.956	326.9	AT5G35630	glutamine synthetase 2	44.22	9.42	4.82	4.83	0.8	1.19	0.46	0.54	2.22	0.62
qFL-Chr14-1	+	GH_D02G0352	cyan	0.907	40.533	AT3G06145	unknown protein; Has 15 Blast hits to 15 proteins in 7 species: Archae - 0; Bacteria - 0; Metazoa - 0; Fungi - 0; Plants - 15; Viruses - 0; Other Eukaryotes - 0 (source: NCBI BLink).	0.53	0.26	1.32	0.44	5.81	3.04	9.54	4.19	3.47	0.64
qFL-Chr14-1	+	GH_D02G0341	darkgreen	0.921	32.081	AT4G14230	CBS domain-containing protein with a domain of unknown function (DUF21)	1.8	3.63	1.84	8.77	2.19	19.21	0.54	4.09	0.11	0.35
qFL-Chr14-1	+	GH_D02G0377	darkred	0.826	18.163	AT3G22740	homocysteine S-methyltransferase 3	0.41	0.11	2.86	0.2	0.82	0.35	9.62	0.32	6.62	2.13
qFL-Chr14-1	+	GH_D02G0370	darkturquoise	0.817	18.702	AT4G10250	HSP20-like chaperones superfamily protein	0.3	0.18	1.15	5.96	4.18	186.33	8.64	361.66	3.47	193.79
qFL-Chr14-1	+	GH_D02G0374	lightcyan	0.927	59.059	AT3G22600	Bifunctional inhibitor/lipid-transfer protein/seed storage 2S albumin superfamily protein	0.61	0.27	0.73	1.48	32.9	4.58	360.66	157.68	709	177.96
qFL-Chr14-1	+	GH_D02G0372	lightcyan	0.97	71.704	AT3G22620	Bifunctional inhibitor/lipid-transfer protein/seed storage 2S albumin superfamily protein	0.3	0	0.81	1.62	2.56	3.51	119.83	7.6	1238.25	276.08
qFL-Chr14-1	+	GH_D02G0355	lightyellow	0.82	24.48	AT1G31710	Copper amine oxidase family protein	10.67	5.25	26.55	2.83	0.58	0.03	0.02	0.02	0.09	0.05
qFL-Chr14-1	+	GH_D02G0371	magenta	0.866	69.457	AT1G59960	NAD(P)-linked oxidoreductase superfamily protein	0	0	0	0	0	0.07	0	3.53	0.49	6.09
qFL-Chr14-1	+	GH_D02G0317	orange	0.877	136.208	AT2G29420	glutathione S-transferase tau 7	0.03	5.13	0.03	0.06	0	0	0.04	0	1.14	0
qFL-Chr14-1	+	GH_D02G0349	orange	0.93	208.719	AT5G19330	ARM repeat protein interacting with ABF2	15.85	24.64	10.77	11.43	7.07	8.81	6.48	6.33	4.59	6.18
qFL-Chr14-1	+	GH_D02G0359	royalblue	0.938	42.179	AT2G18570	UDP-Glycosyltransferase superfamily protein	2.24	1.34	29.35	1.81	34.14	0.17	7.92	0.13	1.04	0.09
qFL-Chr14-2	+	GH_D02G0571	black	0.822	49.433	AT4G16120	COBRA-like protein-7 precursor	16.23	9.92	51.56	18.41	50.2	14.85	43.02	17.16	33.02	12.47
qFL-Chr14-2	+	GH_D02G0586	black	0.86	61.711	AT3G66654	Cyclophilin-like peptidyl-prolyl cis-trans isomerase family protein	3.86	1.3	9.59	1.02	8.76	1.21	14.67	1.48	13.61	0.7
qFL-Chr14-2	+	GH_D02G0486	black	0.866	64.717	AT4G15545	unknown protein; BEST Arabidopsis thaliana protein match is: unknown protein (TAIR:AT1G16520.1); Has 30201 Blast hits to 17322 proteins in 780 species: Archae - 12; Bacteria - 1396; Metazoa - 17338; Fungi - 3422; Plants - 5037; Viruses - 0; Other Eukaryotes - 2996 (source: NCBI BLink).	3.09	0.48	6.67	0.09	6.28	0.02	3.01	0.03	1.61	0.05
qFL-Chr14-2	+	GH_D02G0419	blue	0.897	242.654	AT4G08300	nodulin MtN21 /EamA-like transporter family protein	8.82	3.34	0.93	0.81	0.15	0.22	0.26	0.33	1.52	0.89
qFL-Chr14-2	+	GH_D02G0427	blue	0.916	281.942	AT3G22142	Bifunctional inhibitor/lipid-transfer protein/seed storage 2S albumin superfamily protein	150.49	66.88	2.1	3.02	3.1	1.08	1.93	5.09	30.5	3.84
qFL-Chr14-2	+	GH_D02G0540	blue	0.936	317.756	AT3G06840	unknown protein; BEST Arabidopsis thaliana protein match is: unknown protein (TAIR:AT5G49170.1); Has 33 Blast hits to 33 proteins in 9 species: Archae - 0; Bacteria - 0; Metazoa - 0; Fungi - 0; Plants - 33; Viruses - 0; Other Eukaryotes - 0 (source: NCBI BLink).	11.8	4.61	1.34	1.06	0.51	0.3	0.05	0	0.05	0.05
qFL-Chr14-2	+	GH_D02G0570	grey60	-0.814	23.742	AT3G06760	Drought-responsive family protein	27.56	12.94	14.77	6.77	22.05	8.86	33.35	18.85	28.47	23.02
qFL-Chr14-2	+	GH_D02G0525	grey60	0.902	43.673	AT4G15800	ralf-like 33	1.86	1.99	2.23	16.74	1.24	9.56	1.47	3.38	1.3	4.65
qFL-Chr14-2	+	GH_D02G0444	magenta	0.848	64.913	AT3G23430	phosphate 1	0.51	0.6	1.28	0.79	0.91	0.84	0.37	0.89	4.87	6.18
qFL-Chr14-2	+	GH_D02G0567	magenta	0.859	67.445	AT1G24020	MLP-like protein 423	0	0	0	0	2.44	5.06	1.98	6.38	0.11	58.5
qFL-Chr14-2	+	GH_D02G0409	orange	0.854	117.027	AT3G23130	C2H2 and C2HC zinc fingers superfamily protein	0.05	3.19	0.43	0.24	0.11	0	0	0	0.59	0.39
qFL-Chr14-2	+	GH_D02G0488	orange	0.947	212.72	AT5G18840	Major facilitator superfamily protein	2.43	6.14	0.9	2.37	0.16	0.42	0.07	0.23	0.29	0.11
qFL-Chr14-3	+	GH_D02G1531	black	0.936	87.163	AT1G14820	Sec14p-like phosphatidylinositol transfer family protein	17.24	0.82	20.71	2.55	15.16	2.44	16.98	2.58	17.18	2.05
qFL-Chr14-3	+	GH_D02G1130	black	0.934	90.513	AT4G01400	FUNCTIONS IN: molecular_function unknown; INVOLVED IN: biological_process unknown; LOCATED IN: cellular_component unknown; EXPRESSED IN: 23 plant structures; EXPRESSED DURING: 15 growth stages; CONTAINS InterPro DOMAIN/s: COG4 transport (InterPro:IPR013167); Has 465 Blast hits to 425 proteins in 199 species: Archae - 0; Bacteria - 3; Metazoa - 153; Fungi - 166; Plants - 45; Viruses - 0; Other Euk…	13.82	8.73	14.84	3.65	14.13	2.04	13.26	2	10.35	1.38
qFL-Chr14-3	+	GH_D02G1239	black	0.975	106.541	AT3G01280	voltage dependent anion channel 1	28.97	5.46	49.71	1.91	54.69	2.79	42.94	1.22	33.5	2.34
qFL-Chr14-3	+	GH_D02G1503	blue	0.947	357.311	AT3G60350	ARABidILLO-2	13.39	6.43	1.98	1.53	0.31	0.31	0.54	0.15	0.6	0.3
qFL-Chr14-3	+	GH_D02G1233	blue	0.953	358.694	AT1G69780	Homeobox-leucine zipper protein family	54.86	29.2	13.41	7.57	0.94	0.89	1.37	0.6	6.76	1.29
qFL-Chr14-3	+	GH_D02G0603	blue	0.99	372.879	AT3G06560	poly(A) polymerase 3	26.33	11.33	7.72	2.77	3.02	0.66	3.67	0.98	4.4	1.21
qFL-Chr14-3	+	GH_D02G1542	cyan	0.879	37.928	AT1G03400	2-oxoglutarate (2OG) and Fe(II)-dependent oxygenase superfamily protein	4.16	5.01	4.84	4.62	10.42	7.31	19.03	5.59	12.04	7.29
qFL-Chr14-3	+	GH_D02G1288	cyan	0.926	47.805	AT1G17100	SOUL heme-binding family protein	3.57	3.07	5.62	2.67	32.79	8.35	35.62	12.65	12.56	10.53
qFL-Chr14-3	+	GH_D02G1068	cyan	0.952	53.618	AT1G79620	Leucine-rich repeat protein kinase family protein	4.76	0.23	10.5	0.17	19.42	0.43	25.25	1.33	8.17	0.45
qFL-Chr14-3	+	GH_D02G0824	darkgreen	0.894	30.124	AT4G08180	OSBP(oxysterol binding protein)-related protein 1C	2.47	0.07	0.84	10.42	2.4	24.03	1.63	10.03	2.16	7.42
qFL-Chr14-3	+	GH_D02G1247	darkgreen	0.946	37.197	AT4G39670	Glycolipid transfer protein (GLTP) family protein	0	0.04	2.32	8.75	9.77	21.04	5.22	2.76	0.23	0.44
qFL-Chr14-3	+	GH_D02G1207	darkred	0.811	20.056	AT2G43070	SIGNAL PEPTidE PEPTidASE-LIKE 3	20.88	21.34	22.62	26.33	24.75	29.14	36.55	32.54	46.4	32.52
qFL-Chr14-3	+	GH_D02G1472	darkred	0.855	20.825	AT1G05260	Peroxidase superfamily protein	0.86	0.68	6.11	4.52	9.7	0.92	19.24	5.8	22.05	6.99
qFL-Chr14-3	+	GH_D02G0897	darkred	0.95	36.795	AT4G10810	unknown protein; FUNCTIONS IN: molecular_function unknown; INVOLVED IN: biological_process unknown; LOCATED IN: chloroplast; EXPRESSED IN: 23 plant structures; EXPRESSED DURING: 15 growth stages; BEST Arabidopsis thaliana protein match is: unknown protein (TAIR:AT4G24026.1); Has 1807 Blast hits to 1807 proteins in 277 species: Archae - 0; Bacteria - 0; Metazoa - 736; Fungi - 347; Plants - 385; Vi…	0.5	0.64	0.54	0.23	2.42	0.14	15.87	0.94	13.56	1.68
qFL-Chr14-3	+	GH_D02G1565	darkturquoise	0.914	31.643	AT1G70830	MLP-like protein 28	1.67	9.84	10.74	22.38	25.91	100.76	49.38	271.89	51.68	60.94
qFL-Chr14-3	+	GH_D02G0917	darkturquoise	0.906	32.087	AT1G34300	lectin protein kinase family protein	0.05	0.04	0.3	0.95	1.2	1.42	1.64	6.62	2.6	1.46
qFL-Chr14-3	+	GH_D02G1192	darkturquoise	0.927	33.84	AT2G38650	galacturonosyltransferase 7	15.7	18.34	14.57	15.46	8.57	13.9	9.68	56	8.82	9.83
qFL-Chr14-3	+	GH_D02G1231	grey60	0.813	23.784	AT1G04850	ubiquitin-associated (UBA)/TS-N domain-containing protein	48.97	49.74	48.99	61.93	44.6	65.46	49.08	49.95	28.82	38.16
qFL-Chr14-3	+	GH_D02G0732	grey60	0.857	33.302	AT1G21480	Exostosin family protein	19.87	15.53	27.87	42.67	21.79	48.98	17.18	40.07	15.94	26.06
qFL-Chr14-3	+	GH_D02G0673	grey60	0.959	58.101	AT1G34300	lectin protein kinase family protein	0.19	0.65	0.16	2.94	0.06	2.93	0.05	0.7	0.21	0.14
qFL-Chr14-3	+	GH_D02G0837	lightcyan	0.864	37.098	AT1G22060	LOCATED IN: vacuole; EXPRESSED IN: 23 plant structures; EXPRESSED DURING: 13 growth stages; BEST Arabidopsis thaliana protein match is: FBD, F-box and Leucine Rich Repeat domains containing protein (TAIR:AT1G22000.1); Has 84739 Blast hits to 38714 proteins in 2257 species: Archae - 1436; Bacteria - 11314; Metazoa - 40747; Fungi - 7706; Plants - 4675; Viruses - 308; Other Eukaryotes - 18553 (sourc…	2.15	1.99	0.47	1.65	0.4	1.94	2.46	2.42	6.07	1.71
qFL-Chr14-3	+	GH_D02G0772	lightcyan	0.909	52.268	AT1G21270	wall-associated kinase 2	0	0.06	0.03	0	1.22	0.04	2.5	0.03	6.04	0.04
qFL-Chr14-3	+	GH_D02G0734	lightcyan	0.947	60.935	AT1G21460	Nodulin MtN3 family protein	19.5	66.87	18.33	19.79	34.45	9.15	37.19	5.29	285.49	68.1
qFL-Chr14-3	+	GH_D02G0907	lightyellow	0.847	29.758	AT5G67360	Subtilase family protein	11.35	11.9	46.56	14.84	0.48	0.53	0.99	0.48	0.81	0.52
qFL-Chr14-3	+	GH_D02G0817	lightyellow	0.887	36.631	AT1G44835	YbaK/aminoacyl-tRNA synthetase-associated domain	7.76	8.75	12.68	10.36	9.01	7.53	7.6	3.46	6.4	4.72
qFL-Chr14-3	+	GH_D02G1008	lightyellow	0.947	51.949	AT1G75800	Pathogenesis-related thaumatin superfamily protein	7.86	7.7	21.52	19.23	7.48	2.2	0.69	1.9	0.37	0.12
qFL-Chr14-3	+	GH_D02G1545	magenta	0.925	99.605	AT2G01660	plasmodesmata-located protein 6	4.89	2.47	1.78	1.9	1.32	2.02	26.63	213.3	78.36	392.94
qFL-Chr14-3	+	GH_D02G0752	magenta	0.939	106.906	AT1G21410	F-box/RNI-like superfamily protein	16.46	13.53	15.19	15.36	21.12	42.01	47.92	65.9	98.19	167.12
qFL-Chr14-3	+	GH_D02G0715	magenta	0.95	110.14	AT1G43670	Inositol monophosphatase family protein	21.66	9.35	8.07	4.87	1.63	2.19	6.45	4.39	54.29	164.01
qFL-Chr14-3	+	GH_D02G0886	midnightblue	0.805	31.418	AT1G50010	tubulin alpha-2 chain	24.76	27.1	717.02	515.55	926.77	605.44	565.68	531.11	258.05	227.95
qFL-Chr14-3	+	GH_D02G0840	midnightblue	0.886	42.924	AT4G08685	Pollen Ole e 1 allergen and extensin family protein	264.36	193.13	380.13	376.91	751.05	563.84	642.67	482.22	346.01	335.9
qFL-Chr14-3	+	GH_D02G1311	midnightblue	0.916	49.1	AT3G02850	STELAR K+ outward rectifier	1.53	2.26	4.37	4.07	11.71	7.53	8.94	5.48	2.49	2.71
qFL-Chr14-3	+	GH_D02G0937	orange	0.954	244.073	AT5G42870	phosphatidic acid phosphohydrolase 2	4.85	9.37	1.98	2.57	0.79	1.21	0.42	0.42	0.88	0.58
qFL-Chr14-3	+	GH_D02G1199	orange	0.985	247.715	-	-	2.02	9.18	1.2	2.88	0.65	1.11	0.55	1.15	0.7	1.19
qFL-Chr14-3	+	GH_D02G0875	orange	0.961	252.126	AT2G01710	Chaperone DnaJ-domain superfamily protein	8.63	17.65	2.1	3.67	0.6	1.32	0.27	0.24	0.9	0.97
qFL-Chr14-3	+	GH_D02G0647	royalblue	0.848	23.995	AT3G21760	UDP-Glycosyltransferase superfamily protein	0.97	1.36	2.33	0.57	3.4	0.44	1.69	0.26	0.73	0.09
qFL-Chr14-3	+	GH_D02G1513	royalblue	0.909	33.498	AT1G59960	NAD(P)-linked oxidoreductase superfamily protein	0.49	1.06	15.96	7.11	21.26	4.79	6.35	2.24	3.24	0.34
qFL-Chr14-3	+	GH_D02G1250	royalblue	0.957	42.174	AT1G13340	Regulator of Vps4 activity in the MVB pathway protein	8.99	6.26	25	13.71	27.47	11.26	12.85	2.37	4.89	1.15
qFL-Chr14-4	+	GH_D02G2363	black	0.917	79.076	AT2G21660	cold, circadian rhythm, and rna binding 2	33.83	13.4	42.02	15.53	32.51	12.01	32.05	11.43	26.1	8.59
qFL-Chr14-4	+	GH_D02G2278	blue	0.952	265.918	AT2G01640	unknown protein; FUNCTIONS IN: molecular_function unknown; INVOLVED IN: biological_process unknown; LOCATED IN: cellular_component unknown; EXPRESSED IN: 22 plant structures; EXPRESSED DURING: 13 growth stages.	24.14	7.22	6.84	1.75	6.62	1.46	4.81	1.88	2.97	1.32
qFL-Chr14-4	+	GH_D02G2312	blue	0.913	310.31	AT1G49620	Cyclin-dependent kinase inhibitor family protein	10.25	5.5	1.2	0.51	0.03	0.8	0.11	0.39	0.79	0.83
qFL-Chr14-4	+	GH_D02G2368	blue	0.981	352.67	AT4G34540	NmrA-like negative transcriptional regulator family protein	20.92	10.28	7.24	3.21	5.26	1.77	4.04	0.96	3.41	1.36
qFL-Chr14-4	+	GH_D02G2253	darkred	0.839	19.697	AT2G14880	SWIB/MDM2 domain superfamily protein	22.25	22.53	9.1	8.8	11.01	8.76	33.03	9.67	39.9	15.52
qFL-Chr14-4	+	GH_D02G2307	darkred	0.842	21.105	AT3G19190	autophagy 2	7.3	8.03	5.72	4.42	4.05	4.05	10.36	6.98	14.12	4.73
qFL-Chr14-4	+	GH_D02G2380	darkred	0.892	26.184	AT1G75390	basic leucine-zipper 44	16.75	33.23	16.19	14.09	22.97	16.74	50.72	26.47	84.95	18.53
qFL-Chr14-4	+	GH_D02G2342	darkturquoise	0.935	37.668	AT1G11000	Seven transmembrane MLO family protein	0.17	0.57	2.03	2.2	0.9	2.76	9.77	47.68	5.55	17.38
qFL-Chr14-4	+	GH_D02G2343	lightcyan	0.839	36.911	AT1G60950	2Fe-2S ferredoxin-like superfamily protein	0.13	0	0.23	0.1	0.33	0.33	0.23	0	3.19	0.46
qFL-Chr14-4	+	GH_D02G2255	lightcyan	0.895	52.218	AT3G19540	Protein of unknown function (DUF620)	0.18	0.21	0.16	0.23	0.4	0.4	12.11	13.54	55.98	23.02
qFL-Chr14-4	+	GH_D02G2262	lightyellow	0.88	36.735	AT2G14960	Auxin-responsive GH3 family protein	9.87	9.52	31.34	26.43	9.03	11.47	0.93	0.57	1.72	0.61
qFL-Chr14-4	+	GH_D02G2358	magenta	0.88	69.872	AT4G34500	Protein kinase superfamily protein	8.63	12.78	32.68	42.03	23.75	48.81	21.39	29.36	76.4	125.87
qFL-Chr14-4	+	GH_D02G2243	magenta	0.911	92.227	AT2G14820	Phototropic-responsive NPH3 family protein	0.85	3.31	0.31	1.5	0.85	3	5.69	4.71	11.34	18.48
qFL-Chr14-4	+	GH_D02G2271	orange	0.95	216.814	AT3G19450	GroES-like zinc-binding alcohol dehydrogenase family protein	1.18	3.62	0.03	0.54	0	0.07	0.04	0.24	0.1	0.35
qFL-Chr14-4	+	GH_D02G2345	royalblue	0.832	21.342	AT1G22930	T-complex protein 11	18.23	11.14	40.48	19.83	49.43	33.08	35.12	7.02	29.72	14.27
qFL-Chr14-4	+	GH_D02G2298	royalblue	0.891	31.529	AT4G33985	Protein of unknown function (DUF1685)	0.87	0.27	66.42	30.68	59.07	32.15	9.11	3.06	1.89	0.2
qFL-Chr17-1	-	GH_D03G1824	black	-0.807	43.754	AT4G16520	Ubiquitin-like superfamily protein	2.13	15.8	1.7	13.93	1.99	20.01	2.85	13.57	3.98	37.73
qFL-Chr17-1	-	GH_D03G1939	black	0.887	67.127	AT1G32210	Defender against death (DAD family) protein	4.52	0.16	9.15	0.89	8.22	0.51	9.56	0.9	3.51	0.39
qFL-Chr17-1	-	GH_D03G1872	blue	0.816	46.955	AT3G01680	CONTAINS InterPro DOMAIN/s: Mediator complex subunit Med28 (InterPro:IPR021640); BEST Arabidopsis thaliana protein match is: unknown protein (TAIR:AT3G01670.1); Has 122 Blast hits to 112 proteins in 13 species: Archae - 0; Bacteria - 0; Metazoa - 0; Fungi - 0; Plants - 122; Viruses - 0; Other Eukaryotes - 0 (source: NCBI BLink).	11.93	0.74	6.58	0.35	0.05	0.1	0.03	0.21	0.15	0.13
qFL-Chr17-1	-	GH_D03G1786	blue	0.975	299.4	AT1G12370	photolyase 1	8.85	1.4	1.87	0.28	0.76	0.03	0.91	0.2	1.61	0.2
qFL-Chr17-1	-	GH_D03G1855	blue	0.942	310.175	-	-	9.5	5.69	3.82	2.03	2.28	2.7	2.63	2.38	2.44	1.97
qFL-Chr17-1	-	GH_D03G1798	cyan	0.874	38.142	AT4G12340	copper ion binding	11.37	5.84	28.18	13.29	35.56	17.51	38.9	19.77	22.79	12.03
qFL-Chr17-1	-	GH_D03G1776	darkgreen	0.857	22.556	AT4G22710	cytochrome P450, family 706, subfamily A, polypeptide 2	0.15	0.44	2.59	8.29	4.13	18.26	0.33	2.26	0.65	8.12
qFL-Chr17-1	-	GH_D03G1768	grey60	0.851	31.1	AT4G12320	cytochrome P450, family 706, subfamily A, polypeptide 6	0.32	0.9	4.32	7.64	1.74	11.52	0.31	1.23	0.33	4.05
qFL-Chr17-1	-	GH_D03G1916	magenta	0.838	54.432	AT4G17900	PLATZ transcription factor family protein	3.25	4.54	3.58	2.52	0.87	1.91	2.56	4.14	6.25	14.7
qFL-Chr17-1	-	GH_D03G1882	midnightblue	0.897	45.537	AT4G17670	Protein of unknown function (DUF581)	14.36	24.53	64.6	41.71	91.33	59.75	50.12	43.09	16.46	12.28
qFL-Chr17-1	-	GH_D03G1844	orange	0.96	246.897	-	-	13	32.06	2.2	4.34	0.32	0.35	0.16	0.09	0.3	0.1
qFL-Chr17-1	-	GH_D03G1830	orange	0.971	253.89	AT5G47500	Pectin lyase-like superfamily protein	0.93	3.49	0.39	0.34	0	0	0.07	0.02	0.05	0
qFL-Chr17-1	-	GH_D03G1891	orange	0.979	260.051	AT4G18020	CheY-like two-component responsive regulator family protein	4.41	13.72	1.13	3.05	0.12	0.42	0.17	0.34	1.2	0.65
qFL-Chr17-1	-	GH_D03G1912	royalblue	0.886	27.122	AT3G13940	DNA binding;DNA-directed RNA polymerases	16.92	14.71	25.48	17.64	28.12	17.42	21.41	7.94	14.7	12.24
qFL-Chr17-1	-	GH_D03G1817	royalblue	0.887	31.446	AT1G16030	heat shock protein 70B	0.16	0.05	2.88	0.12	3.93	0.36	0.81	0.11	0.09	0
qFL-Chr18-1	-	GH_D13G0106	black	0.943	88.468	AT4G02510	translocon at the outer envelope membrane of chloroplasts 159	2.75	0.1	3.1	0.38	2.85	0.29	2.53	0.11	2.88	0.13
qFL-Chr18-1	-	GH_D13G0024	blue	0.922	280.527	-	-	37.26	24.15	11.9	12.9	11.99	9.69	13.48	7.76	17.19	10.47
qFL-Chr18-1	-	GH_D13G0042	blue	0.944	320.286	AT3G12250	TGACG motif-binding factor 6	5.13	2.64	0.81	0.41	0.97	0.47	0.51	0.34	0.75	0.28
qFL-Chr18-1	-	GH_D13G0142	blue	0.962	350.455	AT4G30870	Restriction endonuclease, type II-like superfamily protein	6	2.72	0.99	0.5	0.5	0.29	0.7	0.44	0.85	0.24
qFL-Chr18-1	-	GH_D13G0154	darkgreen	0.865	25.619	AT3G11090	LOB domain-containing protein 21	0	0.15	2.2	0.87	11.48	17	1.46	2.48	0.37	0.58
qFL-Chr18-1	-	GH_D13G0152	lightcyan	0.935	61.149	AT2G40320	TRICHOME BIREFRINGENCE-LIKE 33	1.13	0.55	0.73	0.9	2.11	2.4	81.87	99.68	589.27	260.93
qFL-Chr18-1	-	GH_D13G0168	magenta	0.816	47.651	AT2G40095	Alpha/beta hydrolase related protein	1.2	1.23	0.4	0.64	1.67	0.52	1.95	2.64	1.44	5.86
qFL-Chr18-1	-	GH_D13G0120	midnightblue	0.889	47.459	AT5G03960	IQ-domain 12	5.2	2.51	25.83	1.68	54.63	17.54	12.05	2.43	2.53	0.83
qFL-Chr18-1	-	GH_D13G0164	midnightblue	0.91	48.182	AT3G55950	CRINKLY4 related 3	4.31	5.88	12.26	7.99	50.89	44.54	35.9	18.25	12.52	15.4
qFL-Chr18-1	-	GH_D13G0123	orange	0.891	22.768	AT3G57940	Domain of unknown function (DUF1726) ;Putative ATPase (DUF699)	0.92	5.83	0.68	1.99	0.07	1.23	0	2.23	0.22	1.73
qFL-Chr18-1	-	GH_D13G0101	orange	0.801	74.252	AT5G06270	unknown protein; FUNCTIONS IN: molecular_function unknown; INVOLVED IN: biological_process unknown; LOCATED IN: chloroplast; EXPRESSED IN: 21 plant structures; EXPRESSED DURING: 11 growth stages; BEST Arabidopsis thaliana protein match is: unknown protein (TAIR:AT3G11600.1); Has 1807 Blast hits to 1807 proteins in 277 species: Archae - 0; Bacteria - 0; Metazoa - 736; Fungi - 347; Plants - 385; Vi…	1.73	16.27	2.67	13.66	1.05	0.81	0.51	0.52	1.26	0.42
qFL-Chr18-1	-	GH_D13G0084	royalblue	0.932	39.723	AT5G37620	Cysteine/Histidine-rich C1 domain family protein	0.18	0.19	4.99	0.74	7.43	0.19	2.92	0.19	0.49	0.09
qFL-Chr21-1	+	GH_D11G0313	black	0.833	55.977	AT5G45550	Mob1/phocein family protein	2.74	0.23	13.95	2.89	17.62	4.99	16.85	3.27	13.38	1.85
qFL-Chr21-1	+	GH_D11G0183	black	0.865	63.177	AT4G24100	Protein kinase superfamily protein	3.99	3.08	5.33	1.89	4.31	1.8	4.37	1.19	3.05	0.8
qFL-Chr21-1	+	GH_D11G0231	black	0.892	73.573	AT1G64230	ubiquitin-conjugating enzyme 28	96.43	1.43	96.22	1.03	137.34	1.72	185.56	2.12	194.61	2.32
qFL-Chr21-1	+	GH_D11G0407	blue	0.892	283.723	AT5G63460	SAP domain-containing protein	31.72	23.88	11.27	8.73	6.41	6.12	5.33	4.22	5.05	3.86
qFL-Chr21-1	+	GH_D11G0218	blue	0.903	284.67	AT1G63800	ubiquitin-conjugating enzyme 5	46.38	31.08	9.45	6.28	6.13	3.98	11.26	7.17	9.77	6.89
qFL-Chr21-1	+	GH_D11G0302	blue	0.938	301.13	AT4G17920	RING/U-box superfamily protein	3.92	1.24	0.28	0.19	0.04	0.03	0	0.11	0.58	0.03
qFL-Chr21-1	+	GH_D11G0324	cyan	0.824	28.913	AT1G74780	Nodulin-like / Major Facilitator Superfamily protein	2.64	0.41	12.55	1.63	53.56	8.98	49.48	1.84	50.53	1.31
qFL-Chr21-1	+	GH_D11G0450	cyan	0.927	50.858	AT4G24690	ubiquitin-associated (UBA)/TS-N domain-containing protein / octicosapeptide/Phox/Bemp1 (PB1) domain-containing protein	0.45	0	3.33	0.01	8.42	0.07	7.72	0.03	3.7	0.07
qFL-Chr21-1	+	GH_D11G0352	darkred	0.822	17.676	AT3G47550	RING/FYVE/PHD zinc finger superfamily protein	10.28	10.17	6.44	6.07	8.05	6.11	13.26	11.09	15.79	9.8
qFL-Chr21-1	+	GH_D11G0354	darkred	0.825	17.966	AT3G47550	RING/FYVE/PHD zinc finger superfamily protein	3.14	2.24	2.3	1.22	2.41	1.09	3.83	3.09	5.32	1.73
qFL-Chr21-1	+	GH_D11G0176	darkred	0.923	35.046	AT5G42090	Lung seven transmembrane receptor family protein	4.8	2.52	8.65	3.91	17.55	4.48	29.42	14	36.57	19.92
qFL-Chr21-1	+	GH_D11G0425	darkturquoise	0.935	34.13	AT5G50915	basic helix-loop-helix (bHLH) DNA-binding superfamily protein	0	0.24	0.06	0.02	0.09	2.51	0.59	12.95	0.62	0.41
qFL-Chr21-1	+	GH_D11G0243	grey60	0.865	36.494	AT4G23850	AMP-dependent synthetase and ligase family protein	10.64	8.15	49.88	74.86	25.45	64.29	19.44	38.56	19.08	33.41
qFL-Chr21-1	+	GH_D11G0286	lightcyan	0.861	38.896	AT5G47040	lon protease 2	8.92	18.51	11.18	9.01	35.05	11.45	44.44	4.15	79.52	24.43
qFL-Chr21-1	+	GH_D11G0285	lightcyan	0.911	45.806	AT1G32740	SBP (S-ribonuclease binding protein) family protein	17.85	6.31	10.85	10.45	14.89	7.79	15.3	6.88	37.57	14.3
qFL-Chr21-1	+	GH_D11G0358	lightcyan	0.905	56.921	AT5G61430	NAC domain containing protein 100	2.62	3.03	1.69	2.43	2.11	2.27	11.29	7.77	31.51	10.74
qFL-Chr21-1	+	GH_D11G0166	magenta	0.821	46.514	AT4G10430	TMPIT-like protein	9.21	9.01	7.71	9.11	6.21	9.52	8.96	10.6	12.14	16.69
qFL-Chr21-1	+	GH_D11G0363	magenta	0.914	93.29	AT5G61340	unknown protein; BEST Arabidopsis thaliana protein match is: unknown protein (TAIR:AT1G26650.1); Has 30201 Blast hits to 17322 proteins in 780 species: Archae - 12; Bacteria - 1396; Metazoa - 17338; Fungi - 3422; Plants - 5037; Viruses - 0; Other Eukaryotes - 2996 (source: NCBI BLink).	0.33	0.28	0.3	0.42	2.99	2.37	13.6	24.71	43.5	81.3
qFL-Chr21-1	+	GH_D11G0384	magenta	0.945	108.326	AT5G15740	O-fucosyltransferase family protein	25.6	24.81	34.37	30.16	25.9	47.64	58.81	66.01	68	145.83
qFL-Chr21-1	+	GH_D11G0193	midnightblue	0.911	48.816	AT1G62790	Bifunctional inhibitor/lipid-transfer protein/seed storage 2S albumin superfamily protein	12.55	9.12	58.16	70.01	163.92	174.39	76.3	32.41	18.91	7.31
qFL-Chr21-1	+	GH_D11G0328	midnightblue	0.951	56.797	AT1G18890	calcium-dependent protein kinase 1	10.01	9.4	15.56	12.4	34.76	21.46	19.11	6.15	4.89	2.25
qFL-Chr21-1	+	GH_D11G0219	orange	0.968	229.435	AT5G41360	homolog of Xeroderma pigmentosum complementation group B 2	3.23	7.85	0.89	3.44	0.55	1.64	0.86	0.98	1.21	1
qFL-Chr21-1	+	GH_D11G0257	orange	0.966	237.348	AT4G12510	Bifunctional inhibitor/lipid-transfer protein/seed storage 2S albumin superfamily protein	1.51	6.2	0.44	0.74	0.1	0.49	0.06	0	0.07	0.07
qFL-Chr21-1	+	GH_D11G0249	orange	0.975	244.842	AT2G45180	Bifunctional inhibitor/lipid-transfer protein/seed storage 2S albumin superfamily protein	14.06	86.07	5.85	12.65	0.56	3.39	1.02	1.62	0.61	0.73
qFL-Chr21-1	+	GH_D11G0335	royalblue	0.871	26.232	AT3G47730	ATP-binding cassette A2	4.34	3.55	21.69	10.37	20.7	9.47	17	1.51	3.33	0.54
qFM-Chr09-1	-	GH_A09G0298	black	0.861	61.272	AT5G14790	ARM repeat superfamily protein	11.45	8.87	16.94	8.05	20.58	10.26	23.22	7.11	21.81	8.42
qFM-Chr09-1	-	GH_A09G0271	blue	0.806	98.529	AT2G37440	DNAse I-like superfamily protein	5.49	2.76	0.8	0.3	1.56	0.33	3.23	0.93	2.48	0.75
qFM-Chr09-1	-	GH_A09G0267	cyan	0.898	43.786	AT3G28480	Oxoglutarate/iron-dependent oxygenase	0.47	0.72	11.55	1.48	25.07	4.7	23.53	8.16	16.62	4.3
qFM-Chr09-1	-	GH_A09G0302	lightcyan	0.805	30.395	AT1G23740	Oxidoreductase, zinc-binding dehydrogenase family protein	0.8	0.67	0.54	0.45	0.06	0.16	0.75	0.19	8.12	0.32
qFM-Chr09-1	-	GH_A09G0306	magenta	0.815	56.05	AT3G01500	carbonic anhydrase 1	2.29	3.23	0.9	0.54	0.8	0.51	0.35	0.5	1.12	21.86
qFM-Chr09-1	-	GH_A09G0288	royalblue	0.937	39.711	AT3G28180	Cellulose-synthase-like C4	2.89	3.12	33.49	15.33	37.52	12.95	5.71	1.26	1.4	0.24
qFM-Chr12-1	+	GH_A12G0819	black	0.915	75.883	AT4G39870	TLD-domain containing nucleolar protein	10	2.1	12.71	1.31	18.75	1.79	11.78	2.17	8.86	0.99
qFM-Chr12-1	+	GH_A12G0602	black	0.936	89.784	AT2G18030	Peptide methionine sulfoxide reductase family protein	5.88	0.17	13.39	0.09	12.65	0.09	15.36	0.25	16.09	0.17
qFM-Chr12-1	+	GH_A12G1271	black	-0.943	90.019	AT4G01100	adenine nucleotide transporter 1	8.78	25.21	11.55	26.55	8.71	31.82	10.94	36.75	12.98	35.23
qFM-Chr12-1	+	GH_A12G0886	blue	0.935	326.722	AT5G60390	GTP binding Elongation factor Tu family protein	57.58	34.92	21.36	15.94	8.74	9.41	11.32	6.84	11.3	8.63
qFM-Chr12-1	+	GH_A12G1205	blue	0.958	333.334	AT2G45720	ARM repeat superfamily protein	3.44	1.08	0.6	0.26	0.09	0.09	0.04	0.01	0.04	0.03
qFM-Chr12-1	+	GH_A12G0865	blue	0.98	367.332	AT5G63940	Protein kinase protein with adenine nucleotide alpha hydrolases-like domain	8.49	3.95	2.44	0.73	0.88	0.25	0.79	0.1	1.2	0.21
qFM-Chr12-1	+	GH_A12G0953	cyan	0.871	33.731	AT1G43130	like COV 2	14.5	16.28	13.44	11.03	40.59	22.37	44.54	30.52	26.97	18.06
qFM-Chr12-1	+	GH_A12G1369	cyan	0.889	44.02	AT2G47000	ATP binding cassette subfamily B4	0.25	0.58	3.98	1.37	9.85	2.92	8.33	0.6	2.58	0.16
qFM-Chr12-1	+	GH_A12G0598	cyan	0.94	50.508	AT1G75750	GAST1 protein homolog 1	0	0.08	3.56	0	12.22	1.02	17.96	0.31	0.56	0
qFM-Chr12-1	+	GH_A12G0965	darkgreen	0.873	24.852	AT5G04660	cytochrome P450, family 77, subfamily A, polypeptide 4	0.09	0.1	0.61	0.3	1.03	3.67	0.11	0.07	0.15	0.02
qFM-Chr12-1	+	GH_A12G0458	darkgreen	0.899	30.976	AT5G05010	clathrin adaptor complexes medium subunit family protein	0	0	0	1.83	0.03	5.37	0.03	2.45	0.03	1.04
qFM-Chr12-1	+	GH_A12G0534	darkgreen	0.938	35.787	AT5G38450	cytochrome P450, family 735, subfamily A, polypeptide 1	0.01	0	0.8	1.62	1.17	11.77	0.16	0.12	0.03	0.03
qFM-Chr12-1	+	GH_A12G1298	darkred	0.877	25.293	AT1G01230	ORMDL family protein	4.58	0.06	2.29	0.08	9.32	0.28	11.27	0.25	17.45	0.11
qFM-Chr12-1	+	GH_A12G0434	darkred	0.908	32.189	AT1G09840	shaggy-like protein kinase 41	47.24	40.57	55.54	51.14	82.77	61.31	269.53	181.31	425.04	180.32
qFM-Chr12-1	+	GH_A12G0488	darkred	0.942	34.491	AT1G30900	VACUOLAR SORTING RECEPTOR 6	2.33	0.93	2.27	0.72	5.53	1.36	45.39	2.88	47.19	4.95
qFM-Chr12-1	+	GH_A12G0989	darkturquoise	0.869	25.026	AT2G22620	Rhamnogalacturonate lyase family protein	0.63	1.04	0.69	2.82	12.27	40.66	14.18	65.05	4.87	4.58
qFM-Chr12-1	+	GH_A12G1322	darkturquoise	0.906	30.917	AT2G46760	D-arabinono-1,4-lactone oxidase family protein	0	0.1	0.15	0.81	1.55	201.25	1.9	368.38	1.81	98.99
qFM-Chr12-1	+	GH_A12G1196	darkturquoise	0.91	31.886	AT1G01910	P-loop containing nucleoside triphosphate hydrolases superfamily protein	2.23	3.02	3.51	4.76	3.6	8.41	5	14.63	3.83	7.11
qFM-Chr12-1	+	GH_A12G0317	grey60	0.922	48.795	AT4G38360	Protein of unknown function (DUF300)	4.92	5.52	11.29	16.08	8.23	14.88	6.25	8.99	5.41	6.75
qFM-Chr12-1	+	GH_A12G1337	grey60	0.953	58.29	AT5G54160	O-methyltransferase 1	0	0	0.11	3.72	0.16	3.04	0.08	0.15	0	0
qFM-Chr12-1	+	GH_A12G1386	grey60	0.97	63.889	AT3G12410	Polynucleotidyl transferase, ribonuclease H-like superfamily protein	0.45	3.19	13.59	91.46	20.63	81.66	5.3	22.51	0.49	2.46
qFM-Chr12-1	+	GH_A12G1274	lightcyan	0.865	43.884	AT4G01070	UDP-Glycosyltransferase superfamily protein	0.02	0	0.06	0.01	0.03	0.04	1.18	0.02	20.87	0.02
qFM-Chr12-1	+	GH_A12G1326	lightcyan	0.894	52.008	AT2G46770	NAC (No Apical Meristem) domain transcriptional regulator superfamily protein	0.09	0.05	0.11	0.41	0.7	0.89	39.59	29.79	150.76	56.3
qFM-Chr12-1	+	GH_A12G0584	lightyellow	0.946	49.307	AT5G66060	2-oxoglutarate (2OG) and Fe(II)-dependent oxygenase superfamily protein	8.19	9.26	20.65	14.73	9.98	9.91	7.28	6.52	7.47	4.71
qFM-Chr12-1	+	GH_A12G0537	magenta	0.912	82.306	AT5G38200	Class I glutamine amidotransferase-like superfamily protein	0.03	0.1	0.48	0.31	0.09	0.61	0.08	0.52	0.62	3.83
qFM-Chr12-1	+	GH_A12G0752	magenta	0.945	103.691	AT5G67140	F-box/RNI-like superfamily protein	4	5.12	1.73	1.73	1.73	0.7	2.01	0.78	3.37	52.44
qFM-Chr12-1	+	GH_A12G0350	magenta	0.958	109.715	AT2G16980	Major facilitator superfamily protein	0.98	4.49	1.91	1.05	0.52	0.29	0.76	6.42	4.09	27.62
qFM-Chr12-1	+	GH_A12G1327	midnightblue	0.816	32.319	-	-	0.06	0.08	20.31	4.28	61.87	69.83	65.5	31.61	23.84	7.56
qFM-Chr12-1	+	GH_A12G0395	midnightblue	0.851	39.45	AT4G34750	SAUR-like auxin-responsive protein family	0.05	0.88	40.17	13.67	131.22	25.29	35.96	2.39	2.5	0.34
qFM-Chr12-1	+	GH_A12G0495	midnightblue	0.904	46.525	AT4G20170	Domain of unknown function (DUF23)	3.41	4.07	5.91	9.45	47.19	20.98	12.69	2.3	6.3	4.29
qFM-Chr12-1	+	GH_A12G1100	orange	0.984	246.907	AT3G60660	unknown protein; CONTAINS InterPro DOMAIN/s: Protein of unknown function DUF1395 (InterPro:IPR009829); Has 131 Blast hits to 131 proteins in 44 species: Archae - 0; Bacteria - 0; Metazoa - 83; Fungi - 0; Plants - 45; Viruses - 0; Other Eukaryotes - 3 (source: NCBI BLink).	1.18	4.1	0.03	0.93	0.06	0.51	0.03	0.66	0	0.25
qFM-Chr12-1	+	GH_A12G1007	orange	0.977	249.96	AT4G40060	homeobox protein 16	7.58	25.12	1.18	5.2	0.59	2.05	0.47	1.22	1.8	3.96
qFM-Chr12-1	+	GH_A12G1275	orange	0.987	264.225	AT4G01050	thylakoid rhodanese-like	9.24	29.94	5.41	9.1	1.43	4	0.93	1.87	1.86	1.5
qFM-Chr12-1	+	GH_A12G1238	royalblue	0.829	22.721	AT4G01370	MAP kinase 4	4.35	3.5	7.07	3.35	11.6	4.62	8.35	3.56	5.7	2.6
qFM-Chr14-1	-	GH_D02G0269	black	-0.955	94.871	AT3G25040	endoplasmic reticulum retention defective 2B	6.88	22.54	5.06	20.37	7.56	21.11	6.49	21.61	8.32	26.2
qFM-Chr14-1	-	GH_D02G0288	black	0.954	95.463	AT3G24160	putative type 1 membrane protein	3.7	2.2	10.29	0.75	9.65	0.8	10.67	0.38	9.03	0.19
qFM-Chr14-1	-	GH_D02G0336	black	0.976	107.052	AT3G23600	alpha/beta-Hydrolases superfamily protein	18.32	2.19	35.84	0.99	30.61	0.63	32.68	0.36	24.47	0.62
qFM-Chr14-1	-	GH_D02G0311	blue	0.906	101.683	AT5G22355	Cysteine/Histidine-rich C1 domain family protein	6.03	0.05	2.52	0.05	1.15	0.01	0.7	0.02	0.7	0.02
qFM-Chr14-1	-	GH_D02G0310	blue	0.941	260.833	AT5G22355	Cysteine/Histidine-rich C1 domain family protein	4.16	1.15	1.75	0.52	0.44	0.1	0.04	0.04	0.49	0.03
qFM-Chr14-1	-	GH_D02G0302	blue	0.956	326.9	AT5G35630	glutamine synthetase 2	44.22	9.42	4.82	4.83	0.8	1.19	0.46	0.54	2.22	0.62
qFM-Chr14-1	-	GH_D02G0341	darkgreen	0.921	32.081	AT4G14230	CBS domain-containing protein with a domain of unknown function (DUF21)	1.8	3.63	1.84	8.77	2.19	19.21	0.54	4.09	0.11	0.35
qFM-Chr14-1	-	GH_D02G0317	orange	0.877	136.208	AT2G29420	glutathione S-transferase tau 7	0.03	5.13	0.03	0.06	0	0	0.04	0	1.14	0
qFM-Chr17-1	-	GH_D03G0473	black	0.811	40.185	AT5G09960	FUNCTIONS IN: molecular_function unknown; INVOLVED IN: biological_process unknown; LOCATED IN: plasma membrane; EXPRESSED IN: 22 plant structures; EXPRESSED DURING: 13 growth stages; CONTAINS InterPro DOMAIN/s: RPM1-interacting protein 4, defence response (InterPro:IPR008700); BEST Arabidopsis thaliana protein match is: unknown protein (TAIR:AT5G64850.1); Has 30201 Blast hits to 17322 proteins in…	8.97	0	4.85	0	9.69	0	7.98	0.14	5.19	0
qFM-Chr17-1	-	GH_D03G0344	black	0.914	79.215	AT2G22660	Protein of unknown function (duplicated DUF1399)	12.56	8.7	20.2	4.77	21.78	2.94	18.72	1.5	9.55	0.96
qFM-Chr17-1	-	GH_D03G0649	black	0.933	87.616	AT1G21370	unknown protein; CONTAINS InterPro DOMAIN/s: Protein of unknown function DUF218 (InterPro:IPR003848); Has 35333 Blast hits to 34131 proteins in 2444 species: Archae - 798; Bacteria - 22429; Metazoa - 974; Fungi - 991; Plants - 531; Viruses - 0; Other Eukaryotes - 9610 (source: NCBI BLink).	2.3	0	9.29	0.08	8.53	0.07	8.47	0.09	5.99	0
qFM-Chr17-1	-	GH_D03G0585	blue	0.921	327.616	AT5G17510	unknown protein; BEST Arabidopsis thaliana protein match is: unknown protein (TAIR:AT3G03460.1); Has 1807 Blast hits to 1807 proteins in 277 species: Archae - 0; Bacteria - 0; Metazoa - 736; Fungi - 347; Plants - 385; Viruses - 0; Other Eukaryotes - 339 (source: NCBI BLink).	17.62	12.1	5.78	3.81	2.59	1.96	2.11	1.97	2.13	1.1
qFM-Chr17-1	-	GH_D03G0409	blue	0.913	328.734	AT2G22430	homeobox protein 6	264.3	175.69	41.45	35.96	22.63	14.79	7.95	4.05	7.23	1.6
qFM-Chr17-1	-	GH_D03G0541	blue	0.941	344.609	AT3G02950	Tho complex subunit 7/Mft1p	25.85	16.52	7.88	5.43	3.85	3.47	4.56	2.58	4.03	1.84
qFM-Chr17-1	-	GH_D03G0673	cyan	0.856	33.876	AT1G77100	Peroxidase superfamily protein	0.32	0.27	0.16	0.11	1.12	0.1	5.82	0	1.08	0.07
qFM-Chr17-1	-	GH_D03G0372	cyan	0.936	47.97	AT4G39840	unknown protein; FUNCTIONS IN: molecular_function unknown; INVOLVED IN: biological_process unknown; LOCATED IN: endomembrane system; EXPRESSED IN: 23 plant structures; EXPRESSED DURING: 13 growth stages; Has 20719 Blast hits to 6096 proteins in 607 species: Archae - 22; Bacteria - 3243; Metazoa - 4364; Fungi - 2270; Plants - 237; Viruses - 128; Other Eukaryotes - 10455 (source: NCBI BLink).	9.87	4.72	5.9	2.04	32.96	15.52	58.63	12.65	24.07	6.12
qFM-Chr17-1	-	GH_D03G0423	darkgreen	0.842	19.177	AT2G22475	GRAM domain family protein	15.8	20.7	22.18	20.92	17.77	34.09	16.36	23.46	14.05	19.61
qFM-Chr17-1	-	GH_D03G0330	darkgreen	0.944	37.735	AT4G37850	basic helix-loop-helix (bHLH) DNA-binding superfamily protein	0	0	0.02	0.97	0.68	6.73	0.14	0.34	0.32	0.17
qFM-Chr17-1	-	GH_D03G0710	darkturquoise	0.862	23.627	AT1G77280	Protein kinase protein with adenine nucleotide alpha hydrolases-like domain	7.28	13.57	3.67	4.03	5.26	2.93	10.37	26.04	5.96	7.65
qFM-Chr17-1	-	GH_D03G0550	grey60	0.816	27.652	AT5G19440	NAD(P)-binding Rossmann-fold superfamily protein	11.53	22.82	12.25	26.15	8.36	21.62	5.64	10.03	4.31	9.32
qFM-Chr17-1	-	GH_D03G0400	lightyellow	0.929	47.187	AT5G65270	RAB GTPase homolog A4A	4.85	4.6	20.35	13.53	9.59	6.41	2.59	1.49	0.84	0.49
qFM-Chr17-1	-	GH_D03G0632	magenta	0.922	92.962	AT5G11590	Integrase-type DNA-binding superfamily protein	0.35	0.12	0.07	0.03	0	0.41	0.07	0.3	0.44	6.52
qFM-Chr17-1	-	GH_D03G0591	magenta	0.941	104.386	AT1G17665	unknown protein; FUNCTIONS IN: molecular_function unknown; INVOLVED IN: biological_process unknown; LOCATED IN: endomembrane system; EXPRESSED IN: 15 plant structures; EXPRESSED DURING: 11 growth stages; Has 149 Blast hits to 146 proteins in 39 species: Archae - 0; Bacteria - 4; Metazoa - 21; Fungi - 5; Plants - 30; Viruses - 0; Other Eukaryotes - 89 (source: NCBI BLink).	4.14	3.87	2.97	3.99	6.84	12.07	5.03	24.27	11.21	52.89
qFM-Chr17-1	-	GH_D03G0586	magenta	0.974	124.092	AT1G64940	cytochrome P450, family 87, subfamily A, polypeptide 6	11.94	10.05	11.45	10.97	3.06	2.33	16.13	23.06	110.67	274.15
qFM-Chr17-1	-	GH_D03G0365	midnightblue	0.859	35.656	AT5G65470	O-fucosyltransferase family protein	24.98	33.7	66.33	58.41	91.08	69.82	62.85	14.6	31.01	14.86
qFM-Chr17-1	-	GH_D03G0345	midnightblue	0.838	38.065	AT5G10530	Concanavalin A-like lectin protein kinase family protein	0.24	0.01	1.67	0.13	3.24	0.92	0.42	0.03	0.13	0
qFM-Chr17-1	-	GH_D03G0433	midnightblue	0.876	39.863	AT5G65090	DNAse I-like superfamily protein	0.14	0.7	1.05	0.87	4.37	4.48	2.67	1.59	1.48	1.44
qFM-Chr17-1	-	GH_D03G0546	orange	0.951	236.42	AT1G51410	NAD(P)-binding Rossmann-fold superfamily protein	2.26	5.01	0.25	0.48	0	0.13	0	0.09	0	0
qFM-Chr17-1	-	GH_D03G0363	orange	0.995	267.014	AT4G29090	Ribonuclease H-like superfamily protein	12.05	48.62	3.32	10.55	2.77	7.88	0.82	3.75	1.72	2.94
qFM-Chr17-1	-	GH_D03G0385	orange	0.991	269.503	AT5G10290	leucine-rich repeat transmembrane protein kinase family protein	5.4	18.38	2.14	4.03	0.82	2.71	0.57	0.54	1.04	1.1
qFM-Chr17-1	-	GH_D03G0615	royalblue	0.906	36.844	AT1G15210	pleiotropic drug resistance 7	0.01	0	2.38	0.01	4.02	0	0.35	0.02	0.07	0
qFM-Chr17-2	-	GH_D03G1304	black	-0.864	64.566	AT5G50400	purple acid phosphatase 27	3.09	10.84	0.79	21.86	0.48	20.21	0.46	10.78	0.8	9.81
qFM-Chr17-2	-	GH_D03G1312	black	-0.89	66.831	AT4G29090	Ribonuclease H-like superfamily protein	0.07	10.4	0.01	5.16	0.06	8.57	0.17	6.91	0.11	7.62
qFM-Chr17-2	-	GH_D03G0857	black	-0.894	69.699	AT3G56750	unknown protein; BEST Arabidopsis thaliana protein match is: unknown protein (TAIR:AT2G41150.2); Has 128 Blast hits to 128 proteins in 16 species: Archae - 0; Bacteria - 0; Metazoa - 0; Fungi - 0; Plants - 117; Viruses - 0; Other Eukaryotes - 11 (source: NCBI BLink).	5.27	5.09	3.57	12.63	2.26	12.04	1.72	13.13	1.9	11.9
qFM-Chr17-2	-	GH_D03G1107	blue	0.948	358.126	AT5G08020	RPA70-kDa subunit B	65.7	28.85	5.74	4.9	0.24	0.24	0.16	0.17	0.11	0.08
qFM-Chr17-2	-	GH_D03G1176	blue	0.965	361.964	AT4G13940	S-adenosyl-L-homocysteine hydrolase	8.87	4.51	2.24	1.11	1.28	0.14	0.97	0.3	0.61	0.28
qFM-Chr17-2	-	GH_D03G1260	blue	0.969	365.959	AT3G26744	basic helix-loop-helix (bHLH) DNA-binding superfamily protein	25.72	12.67	7.14	1.67	2.6	0.24	1.07	0.32	1.5	0.43
qFM-Chr17-2	-	GH_D03G1282	cyan	0.88	38.917	AT5G50710	unknown protein; BEST Arabidopsis thaliana protein match is: unknown protein (TAIR:AT5G50610.1); Has 30201 Blast hits to 17322 proteins in 780 species: Archae - 12; Bacteria - 1396; Metazoa - 17338; Fungi - 3422; Plants - 5037; Viruses - 0; Other Eukaryotes - 2996 (source: NCBI BLink).	1.04	2.1	0.33	0.54	3.26	0.44	9.91	1.95	3.35	1.57
qFM-Chr17-2	-	GH_D03G1172	cyan	0.894	40.371	AT2G31880	Leucine-rich repeat protein kinase family protein	1.27	0.51	2.08	0.35	3.57	0.3	4.23	0.45	2.52	0.11
qFM-Chr17-2	-	GH_D03G0881	cyan	0.904	40.628	AT4G11280	1-aminocyclopropane-1-carboxylic acid (acc) synthase 6	0.73	0.58	1.38	0.95	5.26	0.93	6.99	0.61	3.56	0.23
qFM-Chr17-2	-	GH_D03G1096	darkgreen	0.805	16.51	AT1G26610	C2H2-like zinc finger protein	0.11	0.51	1.9	6.27	5.3	8.66	2.14	6.86	0.22	2.73
qFM-Chr17-2	-	GH_D03G0929	darkred	0.808	17.623	AT5G41800	Transmembrane amino acid transporter family protein	0.8	0.66	3.43	0.49	3.33	0.29	4	0.13	6.92	0.38
qFM-Chr17-2	-	GH_D03G1167	darkred	0.869	24.531	AT3G26310	cytochrome P450, family 71, subfamily B, polypeptide 35	1.74	1.95	2.05	2.01	2.94	2.63	3.74	2.25	5.62	2.85
qFM-Chr17-2	-	GH_D03G1085	darkred	0.859	27.179	AT2G03350	Protein of unknown function, DUF538	3.33	1.2	15.28	9.06	24.76	11.78	62.41	29.51	55.77	42.21
qFM-Chr17-2	-	GH_D03G1220	darkturquoise	0.849	22.296	AT3G19930	sugar transporter 4	12.64	16.87	11.38	21	27.55	48.74	27.31	64.72	16.21	19.26
qFM-Chr17-2	-	GH_D03G1457	darkturquoise	0.854	22.793	AT2G28790	Pathogenesis-related thaumatin superfamily protein	0.48	2.49	0.73	1.34	0.21	12.3	0.39	21.17	1.86	5.34
qFM-Chr17-2	-	GH_D03G1518	grey60	0.907	42.615	AT5G21060	Glyceraldehyde-3-phosphate dehydrogenase-like family protein	11.05	9.65	11.74	19.01	8.3	25.68	9.76	11.54	6.52	9.79
qFM-Chr17-2	-	GH_D03G1165	grey60	0.928	48.366	AT3G48310	cytochrome P450, family 71, subfamily A, polypeptide 22	10.46	14.29	16.81	26.14	15.21	25.42	12.87	19.32	8.88	11.62
qFM-Chr17-2	-	GH_D03G1316	grey60	0.925	50.417	AT5G24318	O-Glycosyl hydrolases family 17 protein	0.13	0.16	0.79	3.46	0.95	3.75	0	0.22	0.02	0.04
qFM-Chr17-2	-	GH_D03G1434	lightcyan	0.836	35.683	AT1G07620	GTP-binding protein Obg/CgtA	0.06	0	0.26	0.2	0.19	0.31	2.82	0.94	30.25	17.45
qFM-Chr17-2	-	GH_D03G1178	lightcyan	0.873	47.723	AT1G06990	GDSL-like Lipase/Acylhydrolase superfamily protein	0.33	0.02	0.4	0.99	6.3	2.01	175.55	153.42	405.38	196.18
qFM-Chr17-2	-	GH_D03G1285	lightcyan	0.939	58.137	-	-	0.54	0	0.12	0	0.1	0	1.59	0	7.23	0
qFM-Chr17-2	-	GH_D03G1035	lightyellow	0.904	38.831	AT1G74780	Nodulin-like / Major Facilitator Superfamily protein	3.92	0.65	9.64	7.79	2.7	3.6	2.34	1.91	1.26	0.21
qFM-Chr17-2	-	GH_D03G1039	lightyellow	0.903	41.168	AT3G47890	Ubiquitin carboxyl-terminal hydrolase-related protein	5.05	6.89	9.81	9.66	6.04	6.07	5.03	5.31	4.28	2.42
qFM-Chr17-2	-	GH_D03G0934	lightyellow	0.961	56.211	AT1G64390	glycosyl hydrolase 9C2	8.93	12.23	42.02	30.07	6.73	5.48	0.58	0.79	0.21	0.13
qFM-Chr17-2	-	GH_D03G1373	magenta	0.941	106.768	AT2G26975	Ctr copper transporter family	18.43	21.11	21.82	24.21	54.14	57.45	62.29	106.61	88.47	236.49
qFM-Chr17-2	-	GH_D03G0950	magenta	0.962	112.81	AT1G64405	unknown protein; Has 13 Blast hits to 13 proteins in 7 species: Archae - 0; Bacteria - 0; Metazoa - 0; Fungi - 0; Plants - 13; Viruses - 0; Other Eukaryotes - 0 (source: NCBI BLink).	0.17	0.1	0.23	0	0	0	0.64	2.44	3.28	10.27
qFM-Chr17-2	-	GH_D03G1399	magenta	0.983	126.317	AT3G55530	RING/U-box superfamily protein	6.74	10.65	4.83	5.41	2.57	7.15	2.61	9.99	22.66	73.69
qFM-Chr17-2	-	GH_D03G0984	midnightblue	0.807	33.911	AT4G00910	Aluminium activated malate transporter family protein	0	0	2.65	1.18	6.89	1.53	0.16	0.05	0.06	0.02
qFM-Chr17-2	-	GH_D03G1018	midnightblue	0.93	53.77	AT1G76890	Duplicated homeodomain-like superfamily protein	1.26	1.02	14.64	4.41	33.4	24.44	7.38	1.22	2.94	0.5
qFM-Chr17-2	-	GH_D03G0983	orange	0.957	243.218	AT2G27230	transcription factor-related	2.43	5.45	0.67	1.23	0.16	0.2	0.3	0.03	0.02	0.04
qFM-Chr17-2	-	GH_D03G1281	orange	0.984	247.41	AT5G50580	SUMO-activating enzyme 1B	4.47	13.73	0.86	4.59	0.28	1.72	0.66	2.23	0.7	1.89
qFM-Chr17-2	-	GH_D03G1006	orange	0.972	258.476	AT2G46870	AP2/B3-like transcriptional factor family protein	1.59	4.43	0.22	0.56	0.03	0.09	0.02	0.06	0.21	0.07
qFM-Chr19-1	-	GH_D05G1753	black	0.867	63.097	AT1G11860	Glycine cleavage T-protein family	4.42	3.83	8.51	2.22	11.73	3.83	13.24	3.83	11.26	0.32
qFM-Chr19-1	-	GH_D05G1873	black	-0.891	69.586	AT1G76010	Alba DNA/RNA-binding protein	1.76	7.85	0.58	5.88	0.49	5.6	0.52	4.05	0.77	6.7
qFM-Chr19-1	-	GH_D05G1564	black	0.955	98.072	AT2G34250	SecY protein transport family protein	23.11	7.84	37.88	4.85	38.33	5.21	45.64	10.89	27.44	9.03
qFM-Chr19-1	-	GH_D05G1978	blue	0.979	336.792	AT3G18030	HAL3-like protein A	25.53	5.3	4.69	0.94	1.89	0.46	1.75	0.38	1.98	0.38
qFM-Chr19-1	-	GH_D05G1571	blue	0.929	338.73	AT1G29270	unknown protein; BEST Arabidopsis thaliana protein match is: unknown protein (TAIR:AT2G40435.1); Has 98 Blast hits to 98 proteins in 15 species: Archae - 0; Bacteria - 0; Metazoa - 0; Fungi - 0; Plants - 98; Viruses - 0; Other Eukaryotes - 0 (source: NCBI BLink).	4.77	2.52	0.53	0.48	0	0.04	0.05	0	0	0
qFM-Chr19-1	-	GH_D05G1859	blue	0.963	359.674	AT4G38470	ACT-like protein tyrosine kinase family protein	3.45	1.5	0.49	0.4	0.18	0.05	0.21	0.06	0.41	0
qFM-Chr19-1	-	GH_D05G1979	cyan	0.833	30.69	AT1G75180	Erythronate-4-phosphate dehydrogenase family protein	16.84	14.8	15.39	11.79	27.41	16.41	29.74	10.5	27.24	14.09
qFM-Chr19-1	-	GH_D05G1642	cyan	0.833	33.477	AT2G28510	Dof-type zinc finger DNA-binding family protein	0.41	0.57	0.78	0.24	12.17	0.17	7.38	0.38	2.76	1.36
qFM-Chr19-1	-	GH_D05G1838	cyan	0.928	44.95	AT1G76250	unknown protein; INVOLVED IN: biological_process unknown; LOCATED IN: endomembrane system; EXPRESSED IN: 6 plant structures; EXPRESSED DURING: 4 anthesis, petal differentiation and expansion stage; Has 74 Blast hits to 74 proteins in 16 species: Archae - 0; Bacteria - 0; Metazoa - 1; Fungi - 0; Plants - 69; Viruses - 0; Other Eukaryotes - 4 (source: NCBI BLink).	3.74	1.9	7.04	3.57	8.51	3.44	16.57	4	6.09	2.65
qFM-Chr19-1	-	GH_D05G1951	darkgreen	0.82	18.28	AT2G21520	Sec14p-like phosphatidylinositol transfer family protein	4.33	5.42	26.81	27.77	29.26	47.45	25.87	19.55	15.62	10.01
qFM-Chr19-1	-	GH_D05G1777	darkgreen	0.91	28.708	AT4G04020	fibrillin	10.45	10.83	24.95	23.76	26.74	53.6	21.45	22.99	6.23	4.81
qFM-Chr19-1	-	GH_D05G1852	darkgreen	0.915	31.133	AT1G76160	SKU5 similar 5	1.76	1.72	10.77	50.94	58.99	99.63	21.95	20.48	3.84	1.91
qFM-Chr19-1	-	GH_D05G1371	darkred	0.809	16.965	AT3G13772	transmembrane nine 7	20.28	22.42	35.62	29.82	19.31	28.73	47.36	33.06	76.83	22.27
qFM-Chr19-1	-	GH_D05G1537	darkred	0.86	24.808	AT2G34410	O-acetyltransferase family protein	13.7	13.61	20.82	17.54	29.39	13.59	145.83	132.45	236.9	74.83
qFM-Chr19-1	-	GH_D05G1354	darkred	0.861	25.386	AT1G17730	vacuolar protein sorting 46.1	38.31	31.75	39.92	28.65	56.64	38.7	85.13	49.22	78.18	67.28
qFM-Chr19-1	-	GH_D05G1875	darkred	0.909	29.82	AT5G42180	Peroxidase superfamily protein	0	0.08	0.06	0.02	0.15	0.21	9.77	0.96	9.22	1.55
qFM-Chr19-1	-	GH_D05G2052	darkturquoise	0.929	35.596	AT1G47480	alpha/beta-Hydrolases superfamily protein	0.14	0.59	0.2	0.11	0.12	0.26	0.84	22.35	0.67	2.05
qFM-Chr19-1	-	GH_D05G1340	darkturquoise	0.967	42.684	AT2G30395	ovate family protein 17	0	0.14	0	0	0.42	0.41	16.83	93.75	1.81	0.56
qFM-Chr19-1	-	GH_D05G1880	darkturquoise	0.967	42.862	AT1G75900	GDSL-like Lipase/Acylhydrolase superfamily protein	0.31	0.22	0.78	1.67	4.09	82.54	6.21	977.09	2.47	213.05
qFM-Chr19-1	-	GH_D05G1560	lightyellow	0.869	32.665	AT1G29670	GDSL-like Lipase/Acylhydrolase superfamily protein	26.12	10.45	74.41	67.79	18.07	19.94	10.41	2.9	7.68	0.8
qFM-Chr19-1	-	GH_D05G1512	lightyellow	0.869	38.108	AT2G34590	Transketolase family protein	25.79	26.81	35.04	27.28	17.88	15.04	9.94	4.87	2.8	1.65
qFM-Chr19-1	-	GH_D05G1280	magenta	0.969	120.063	AT1G80360	Pyridoxal phosphate (PLP)-dependent transferases superfamily protein	14.06	13.57	10.01	8	8.5	16.44	28.47	39.4	33.08	105.19
qFM-Chr19-1	-	GH_D05G2004	magenta	0.977	124.9	AT1G75050	Pathogenesis-related thaumatin superfamily protein	7.57	2.43	0.4	4.24	5.06	4.38	11.66	34.75	850.5	3174.26
qFM-Chr19-1	-	GH_D05G1796	magenta	0.984	126.874	AT4G17220	microtubule-associated proteins 70-5	0.3	0.11	0.05	0.14	0.13	0.29	0.61	1.96	3.53	21.55
qFM-Chr19-1	-	GH_D05G1638	midnightblue	0.917	51.74	AT5G49800	Polyketide cyclase/dehydrase and lipid transport superfamily protein	2.47	1.45	11.15	3.11	27.39	14.51	5.55	0.75	0.8	0.37
qFM-Chr19-1	-	GH_D05G1493	midnightblue	0.925	53.419	AT1G30360	Early-responsive to dehydration stress protein (ERD4)	30.95	29.47	134.52	125.09	241.43	204.62	124.59	81.5	46.47	32.63
qFM-Chr19-1	-	GH_D05G1298	midnightblue	0.943	58.844	AT1G79910	Regulator of Vps4 activity in the MVB pathway protein	1.93	1	25.11	6.98	111.89	45.82	25.63	3.41	7.75	3.42
qFM-Chr19-1	-	GH_D05G1534	orange	0.963	227.599	AT1G29950	basic helix-loop-helix (bHLH) DNA-binding superfamily protein	30.22	81	24.63	26.23	14.89	21.22	14.63	19.25	10.28	5.22
qFM-Chr19-1	-	GH_D05G1732	orange	0.97	233.652	AT4G21870	HSP20-like chaperones superfamily protein	0.49	4.43	0.05	0.78	0.11	0	0	0	0.06	0
qFM-Chr19-1	-	GH_D05G1966	orange	0.976	247.314	AT1G47270	tubby like protein 6	1.33	10.41	0.17	1.07	0	0	0.02	0	0	0.04
qFM-Chr19-1	-	GH_D05G1736	royalblue	0.895	34.516	AT1G11655	unknown protein; BEST Arabidopsis thaliana protein match is: unknown protein (TAIR:AT4G21902.1); Has 22 Blast hits to 22 proteins in 6 species: Archae - 0; Bacteria - 0; Metazoa - 0; Fungi - 0; Plants - 22; Viruses - 0; Other Eukaryotes - 0 (source: NCBI BLink).	0.3	0	5.94	0.57	4.22	0.15	0.29	0.07	0.08	0.16
qFM-Chr19-1	-	GH_D05G1346	royalblue	0.933	40.676	AT3G16370	GDSL-like Lipase/Acylhydrolase superfamily protein	68.82	9.44	1642.06	40.59	1632.52	30.58	481.07	14.53	130.23	5.05
qFM-Chr19-1	-	GH_D05G1798	royalblue	0.949	43.04	AT4G16380	Heavy metal transport/detoxification superfamily protein	0.19	0.1	100.48	9.21	106.03	33.3	36.65	9.64	9.08	4.34
qFS-Chr14-3	+	GH_D02G2363	black	0.917	79.076	AT2G21660	cold, circadian rhythm, and rna binding 2	33.83	13.4	42.02	15.53	32.51	12.01	32.05	11.43	26.1	8.59
qFS-Chr14-3	+	GH_D02G2278	blue	0.952	265.918	AT2G01640	unknown protein; FUNCTIONS IN: molecular_function unknown; INVOLVED IN: biological_process unknown; LOCATED IN: cellular_component unknown; EXPRESSED IN: 22 plant structures; EXPRESSED DURING: 13 growth stages.	24.14	7.22	6.84	1.75	6.62	1.46	4.81	1.88	2.97	1.32
qFS-Chr14-3	+	GH_D02G2312	blue	0.913	310.31	AT1G49620	Cyclin-dependent kinase inhibitor family protein	10.25	5.5	1.2	0.51	0.03	0.8	0.11	0.39	0.79	0.83
qFS-Chr14-3	+	GH_D02G2368	blue	0.981	352.67	AT4G34540	NmrA-like negative transcriptional regulator family protein	20.92	10.28	7.24	3.21	5.26	1.77	4.04	0.96	3.41	1.36
qFS-Chr14-3	+	GH_D02G2253	darkred	0.839	19.697	AT2G14880	SWIB/MDM2 domain superfamily protein	22.25	22.53	9.1	8.8	11.01	8.76	33.03	9.67	39.9	15.52
qFS-Chr14-3	+	GH_D02G2307	darkred	0.842	21.105	AT3G19190	autophagy 2	7.3	8.03	5.72	4.42	4.05	4.05	10.36	6.98	14.12	4.73
qFS-Chr14-3	+	GH_D02G2380	darkred	0.892	26.184	AT1G75390	basic leucine-zipper 44	16.75	33.23	16.19	14.09	22.97	16.74	50.72	26.47	84.95	18.53
qFS-Chr14-3	+	GH_D02G2342	darkturquoise	0.935	37.668	AT1G11000	Seven transmembrane MLO family protein	0.17	0.57	2.03	2.2	0.9	2.76	9.77	47.68	5.55	17.38
qFS-Chr14-3	+	GH_D02G2343	lightcyan	0.839	36.911	AT1G60950	2Fe-2S ferredoxin-like superfamily protein	0.13	0	0.23	0.1	0.33	0.33	0.23	0	3.19	0.46
qFS-Chr14-3	+	GH_D02G2255	lightcyan	0.895	52.218	AT3G19540	Protein of unknown function (DUF620)	0.18	0.21	0.16	0.23	0.4	0.4	12.11	13.54	55.98	23.02
qFS-Chr14-3	+	GH_D02G2262	lightyellow	0.88	36.735	AT2G14960	Auxin-responsive GH3 family protein	9.87	9.52	31.34	26.43	9.03	11.47	0.93	0.57	1.72	0.61
qFS-Chr14-3	+	GH_D02G2358	magenta	0.88	69.872	AT4G34500	Protein kinase superfamily protein	8.63	12.78	32.68	42.03	23.75	48.81	21.39	29.36	76.4	125.87
qFS-Chr14-3	+	GH_D02G2243	magenta	0.911	92.227	AT2G14820	Phototropic-responsive NPH3 family protein	0.85	3.31	0.31	1.5	0.85	3	5.69	4.71	11.34	18.48
qFS-Chr14-3	+	GH_D02G2271	orange	0.95	216.814	AT3G19450	GroES-like zinc-binding alcohol dehydrogenase family protein	1.18	3.62	0.03	0.54	0	0.07	0.04	0.24	0.1	0.35
qFS-Chr14-3	+	GH_D02G2345	royalblue	0.832	21.342	AT1G22930	T-complex protein 11	18.23	11.14	40.48	19.83	49.43	33.08	35.12	7.02	29.72	14.27
qFS-Chr14-3	+	GH_D02G2298	royalblue	0.891	31.529	AT4G33985	Protein of unknown function (DUF1685)	0.87	0.27	66.42	30.68	59.07	32.15	9.11	3.06	1.89	0.2
qFS-Chr24-1	+	GH_D08G0797	black	0.898	74.986	AT2G43350	glutathione peroxidase 3	3.15	0.42	12.57	0.24	18.54	0.47	17.94	0.42	14.41	0.59
qFS-Chr24-1	+	GH_D08G0637	blue	0.916	296.952	AT1G02140	mago nashi family protein	15.97	10.91	6.46	5.57	4.34	3.52	5.21	2.82	3.53	3.6
qFS-Chr24-1	+	GH_D08G0777	blue	0.943	320.448	AT4G03150	unknown protein; FUNCTIONS IN: molecular_function unknown; INVOLVED IN: biological_process unknown; LOCATED IN: chloroplast; EXPRESSED IN: 20 plant structures; EXPRESSED DURING: 13 growth stages; Has 30201 Blast hits to 17322 proteins in 780 species: Archae - 12; Bacteria - 1396; Metazoa - 17338; Fungi - 3422; Plants - 5037; Viruses - 0; Other Eukaryotes - 2996 (source: NCBI BLink).	8.96	4.31	2.64	2.52	2.01	1.43	1.07	0.83	1.6	1.11
qFS-Chr24-1	+	GH_D08G0771	blue	0.935	346.616	AT1G54690	gamma histone variant H2AX	91.67	44.73	5.35	5.9	0.28	0.28	0.29	0.16	0.56	0.18
qFS-Chr24-1	+	GH_D08G0680	cyan	0.827	28.292	AT2G30580	DREB2A-interacting protein 2	0.49	0.48	0.42	0.2	2.36	0.63	2.99	0.23	0.29	0.22
qFS-Chr24-1	+	GH_D08G0722	cyan	0.924	45.461	AT1G03140	splicing factor Prp18 family protein	3.94	4.66	5.74	3.22	10.22	3.45	12.89	3.99	7.86	1.07
qFS-Chr24-1	+	GH_D08G0756	darkgreen	0.814	14.441	AT2G48150	glutathione peroxidase 4	5.02	14.22	5.21	20.6	14.17	36.77	24.63	15.01	6.1	6.97
qFS-Chr24-1	+	GH_D08G0793	darkgreen	0.868	27.926	AT1G03010	Phototropic-responsive NPH3 family protein	0.13	0.07	5.31	2.19	15.49	23.62	2.34	1.14	0.94	0.03
qFS-Chr24-1	+	GH_D08G0778	darkred	0.82	20.174	AT5G62000	auxin response factor 2	1.03	0.85	0.31	0.36	0.26	1	15.34	5.3	7.86	0.92
qFS-Chr24-1	+	GH_D08G0677	darkturquoise	0.829	17.706	AT1G06730	pfkB-like carbohydrate kinase family protein	1.98	2.32	1.5	1.57	3.54	3.52	3.1	6.69	2.76	2.26
qFS-Chr24-1	+	GH_D08G0684	darkturquoise	0.83	18.913	AT5G43700	AUX/IAA transcriptional regulator family protein	1.6	1.9	6.83	8.86	5.13	8.6	11.92	26.79	0.87	0.27
qFS-Chr24-1	+	GH_D08G0672	grey60	0.906	44.216	AT2G42430	lateral organ boundaries-domain 16	0.06	0.17	0.25	4.92	0.22	7.05	0.2	1.31	0.08	0.09
qFS-Chr24-1	+	GH_D08G0708	lightcyan	0.876	39.066	AT3G22750	Protein kinase superfamily protein	1.71	1.26	0.79	0.49	0.14	0.12	0.38	0.35	4.42	0.84
qFS-Chr24-1	+	GH_D08G0786	magenta	0.885	75.11	AT5G23660	homolog of Medicago truncatula MTN3	0.29	0.41	2.42	2.37	0.22	1.67	4.81	5.38	14.59	33.89
qFS-Chr24-1	+	GH_D08G0799	orange	0.926	215.902	AT1G58210	kinase interacting family protein	4.03	6.91	1.28	1.54	0.21	0.36	0.05	0.4	0.52	0.08
qFS-Chr24-1	+	GH_D08G0701	orange	0.95	238.226	AT4G14713	TIFY domain/Divergent CCT motif family protein	5	9.72	1.15	2.02	0.08	0.91	0.29	0.04	0.14	0.24
qFS-Chr24-1	+	GH_D08G0698	orange	0.968	248.839	AT4G02670	indeterminate(id)-domain 12	10.29	35.35	1.02	2.27	0.15	0.16	0.16	0.04	0.41	0.27
qFS-Chr24-1	+	GH_D08G0638	royalblue	0.83	22.576	AT3G60280	uclacyanin 3	3.9	1.57	117.35	51.72	79.23	17.38	28.84	10.15	30.04	13.45
qFS-Chr25-1	+	GH_D06G0381	black	-0.908	78.908	AT4G34170	Galactose oxidase/kelch repeat superfamily protein	0.18	14.31	0.2	33.23	0.31	41.32	0.33	45.07	0.29	26.76
qFS-Chr25-1	+	GH_D06G1080	black	-0.918	82.596	AT4G30600	signal recognition particle receptor alpha subunit family protein	10.51	37.02	10.18	63.13	14.32	81.72	16.75	82.48	14.56	64.21
qFS-Chr25-1	+	GH_D06G0608	black	-0.958	101.418	AT5G19990	regulatory particle triple-A ATPase 6A	3	20.79	1.47	21.66	0.85	20.99	0.78	19.35	1.38	15.97
qFS-Chr25-1	+	GH_D06G1317	blue	0.966	378.389	AT4G29090	Ribonuclease H-like superfamily protein	97.63	43.08	14.16	11.41	7.63	6.55	4.98	3.68	11.12	4.74
qFS-Chr25-1	+	GH_D06G1297	blue	0.979	380.948	AT1G48310	chromatin remodeling factor18	20.21	9.26	4.05	1.86	2.53	1.24	2.11	0.83	2.65	0.71
qFS-Chr25-1	+	GH_D06G0565	blue	0.981	385.224	AT3G15790	methyl-CPG-binding domain 11	56.14	20.14	9.3	3.5	1.74	0.51	2.02	0.17	3.24	0.85
qFS-Chr25-1	+	GH_D06G0825	cyan	0.909	41.909	AT2G05840	20S proteasome subunit PAA2	38.28	38.67	52.25	47.62	71.44	50.53	87.54	45.18	50.23	42.24
qFS-Chr25-1	+	GH_D06G0478	cyan	0.915	45.395	AT1G44110	Cyclin A1;1	0.33	0.28	4.99	1.81	8.98	5.71	11.8	3.1	6.53	1.88
qFS-Chr25-1	+	GH_D06G0468	cyan	0.936	49.578	AT1G44170	aldehyde dehydrogenase 3H1	2.04	1.22	2.05	0.81	17.68	7.81	34.01	9.77	7.28	5.56
qFS-Chr25-1	+	GH_D06G1112	darkgreen	0.895	29.019	AT1G80490	TOPLESS-related 1	1.5	2.48	18	20.84	31.81	50.58	24.01	21.78	7.85	3.69
qFS-Chr25-1	+	GH_D06G0339	darkgreen	0.94	34.48	AT1G35220	unknown protein; FUNCTIONS IN: molecular_function unknown; INVOLVED IN: biological_process unknown; LOCATED IN: cellular_component unknown; EXPRESSED IN: 22 plant structures; EXPRESSED DURING: 13 growth stages; Has 313 Blast hits to 185 proteins in 75 species: Archae - 0; Bacteria - 0; Metazoa - 200; Fungi - 0; Plants - 67; Viruses - 0; Other Eukaryotes - 46 (source: NCBI BLink).	0.01	0.02	1.15	2.07	3.68	6.78	1.55	3.26	0.29	0.19
qFS-Chr25-1	+	GH_D06G0377	darkred	0.827	18.393	AT1G22050	membrane-anchored ubiquitin-fold protein 6 precursor	0.74	1.57	1.62	1.99	3.55	1.97	5.6	1.93	8.04	3.55
qFS-Chr25-1	+	GH_D06G0578	darkred	0.817	19.075	AT2G26670	Plant haem oxygenase (decyclizing) family protein	9.8	8.4	8.36	5.85	11.24	9.58	24.06	11.31	19.39	17.96
qFS-Chr25-1	+	GH_D06G0334	darkred	0.807	19.216	AT5G65380	MATE efflux family protein	5.43	3.83	5.92	10.27	36.38	7.68	88.15	22.32	65.63	59.95
qFS-Chr25-1	+	GH_D06G0905	darkturquoise	0.881	28.815	AT1G02180	ferredoxin-related	0.7	1.79	2.48	6.84	57.46	197.08	273.13	955.35	391.83	429.85
qFS-Chr25-1	+	GH_D06G0433	darkturquoise	0.932	34.974	AT1G75710	C2H2-like zinc finger protein	0.83	0.77	0.31	0.6	0.47	0.31	0.02	11.7	0.06	0.09
qFS-Chr25-1	+	GH_D06G1152	darkturquoise	0.944	38.324	AT5G10770	Eukaryotic aspartyl protease family protein	0.6	0.65	1.97	25.36	45.94	144.8	309.94	753.12	110.69	201.41
qFS-Chr25-1	+	GH_D06G0458	grey60	0.887	38.935	AT1G77590	long chain acyl-CoA synthetase 9	17.76	26.45	42.2	56.18	22	47.86	20.95	38.15	11.66	13.4
qFS-Chr25-1	+	GH_D06G1259	grey60	0.879	39.547	AT1G22750	unknown protein; FUNCTIONS IN: molecular_function unknown; INVOLVED IN: biological_process unknown; LOCATED IN: vacuole; EXPRESSED IN: 23 plant structures; EXPRESSED DURING: 15 growth stages; CONTAINS InterPro DOMAIN/s: Protein of unknown function DUF1475 (InterPro:IPR009943); Has 185 Blast hits to 155 proteins in 21 species: Archae - 0; Bacteria - 8; Metazoa - 3; Fungi - 0; Plants - 64; Viruses …	10.42	11.83	7.02	22.63	6.08	17.42	5.28	5.55	2.43	1.61
qFS-Chr25-1	+	GH_D06G0867	grey60	0.903	41.054	AT4G33180	alpha/beta-Hydrolases superfamily protein	1.78	17	2.38	47.38	1.34	45.91	1.17	32.73	0.3	0.93
qFS-Chr25-1	+	GH_D06G0850	lightcyan	0.852	43.323	AT3G43120	SAUR-like auxin-responsive protein family	5.87	5.18	9.32	7.34	9.94	10.94	52.46	54.99	158.22	97.3
qFS-Chr25-1	+	GH_D06G0388	lightcyan	0.931	51.927	AT1G78020	Protein of unknown function (DUF581)	3.15	2.73	4.82	1.41	2.01	2.22	3.92	0.99	13.38	3.26
qFS-Chr25-1	+	GH_D06G0304	lightcyan	0.941	56.991	AT4G24480	Protein kinase superfamily protein	0.59	0.22	2.2	0.71	0.68	0.35	2.67	0.83	9.72	3.65
qFS-Chr25-1	+	GH_D06G0613	lightyellow	0.877	34.743	AT2G26730	Leucine-rich repeat protein kinase family protein	3.11	6.37	17.1	18.26	0.48	1.21	0.11	0.05	0.13	0.07
qFS-Chr25-1	+	GH_D06G1072	lightyellow	0.966	58.302	AT2G24230	Leucine-rich repeat protein kinase family protein	6.42	11.01	35.45	28.64	9.12	8.9	1.93	0.55	0.28	0.08
qFS-Chr25-1	+	GH_D06G0615	lightyellow	0.976	60.313	AT2G26910	pleiotropic drug resistance 4	7.32	8.73	39.17	29.9	12.86	6.82	1.54	0.98	1.79	1.26
qFS-Chr25-1	+	GH_D06G0710	magenta	0.969	120.599	AT5G19740	Peptidase M28 family protein	0.83	0.45	1.52	0.43	0.64	0.16	0.54	2.01	11.55	27.76
qFS-Chr25-1	+	GH_D06G1226	magenta	0.974	121.295	AT5G06720	peroxidase 2	4.22	2.9	1.19	1.81	0.68	0.58	3.52	6.89	42.65	156.65
qFS-Chr25-1	+	GH_D06G0583	magenta	0.99	130.818	AT1G80140	Pectin lyase-like superfamily protein	0.39	0	0	0.02	0.02	0	0.04	2.22	3.13	10.89
qFS-Chr25-1	+	GH_D06G0929	midnightblue	0.88	41.613	AT3G13920	eukaryotic translation initiation factor 4A1	23.99	23.63	44.01	42.73	66.74	43.8	45.56	23.02	17.89	12.79
qFS-Chr25-1	+	GH_D06G0543	midnightblue	0.88	42.094	AT5G20270	heptahelical transmembrane protein1	13.96	16.3	75.36	68.08	123.83	104.2	71.22	60.46	37.37	19.65
qFS-Chr25-1	+	GH_D06G0627	midnightblue	0.923	53.705	AT3G24420	alpha/beta-Hydrolases superfamily protein	0.22	0.16	30.96	8.09	98.73	50.69	16.07	8.5	1.49	1.32
qFS-Chr25-1	+	GH_D06G0554	orange	0.967	244.869	AT3G42170	BED zinc finger ;hAT family dimerisation domain	11.44	24.66	5.8	9.01	3.41	5.36	1.77	1.85	1.72	3.17
qFS-Chr25-1	+	GH_D06G1008	orange	0.973	255.67	AT3G18380	sequence-specific DNA binding transcription factors;sequence-specific DNA binding	7.87	21.9	4.12	5.12	1.6	1.41	1.74	1.36	1.42	1.06
qFS-Chr25-1	+	GH_D06G1215	orange	0.981	271.422	AT3G13560	O-Glycosyl hydrolases family 17 protein	13.73	38.14	3.5	6.57	1.12	2.08	1.12	0.92	1.74	0.66
qFS-Chr25-1	+	GH_D06G0682	royalblue	0.885	28.997	AT4G28880	casein kinase I-like 3	15.64	14.13	24.42	18.45	23.99	20.3	20.38	12.77	14.18	9.98
qFS-Chr25-1	+	GH_D06G0586	royalblue	0.859	29.122	AT2G26690	Major facilitator superfamily protein	1	0.22	51.51	1.29	29.62	0.66	4.49	0.15	1.33	0.13
qFS-Chr25-1	+	GH_D06G1378	royalblue	0.888	30.464	AT5G49810	methionine S-methyltransferase	18.99	15.92	40.12	19.63	28.94	20.75	22.96	11.44	9.73	4.17
qLP-Chr14-2	-	GH_D02G2052	black	0.873	62.011	AT5G23230	nicotinamidase 2	28.53	13.4	51.36	14.42	56.79	19.02	33.06	6.47	32.14	3.08
qLP-Chr14-2	-	GH_D02G2150	black	-0.871	64.46	AT5G64230	unknown protein; FUNCTIONS IN: molecular_function unknown; INVOLVED IN: biological_process unknown; LOCATED IN: endomembrane system; EXPRESSED IN: 9 plant structures; EXPRESSED DURING: 4 anthesis, petal differentiation and expansion stage; BEST Arabidopsis thaliana protein match is: unknown protein (TAIR:AT3G19920.1); Has 35333 Blast hits to 34131 proteins in 2444 species: Archae - 798; Bacteria …	3.08	6.13	0.72	6.67	0.92	6.35	0.74	4.46	0.8	4.46
qLP-Chr14-2	-	GH_D02G2206	black	-0.889	71.115	AT4G36720	HVA22-like protein K	3.27	8.18	0.93	6.36	0.63	6.41	0.65	5.71	0.93	5.4
qLP-Chr14-2	-	GH_D02G2278	blue	0.952	265.918	AT2G01640	unknown protein; FUNCTIONS IN: molecular_function unknown; INVOLVED IN: biological_process unknown; LOCATED IN: cellular_component unknown; EXPRESSED IN: 22 plant structures; EXPRESSED DURING: 13 growth stages.	24.14	7.22	6.84	1.75	6.62	1.46	4.81	1.88	2.97	1.32
qLP-Chr14-2	-	GH_D02G2048	blue	0.965	296.185	AT4G14320	Zinc-binding ribosomal protein family protein	251.83	126.22	103.95	53.95	78.79	54.02	104.06	40.72	63.65	44.77
qLP-Chr14-2	-	GH_D02G2182	blue	0.93	321.619	AT1G09730	Cysteine proteinases superfamily protein	3.96	1.65	0.24	0.27	0.17	0.07	0.02	0.01	0.08	0
qLP-Chr14-2	-	GH_D02G2154	cyan	0.807	26.905	AT1G02170	metacaspase 1	0.16	0.49	1.06	0.26	2.05	0.41	12.37	0.83	2.85	0.6
qLP-Chr14-2	-	GH_D02G2218	cyan	0.863	34.653	AT1G23780	F-box family protein	8.94	6.7	13.66	10.61	18.97	11.99	26.06	10.61	20.89	13.16
qLP-Chr14-2	-	GH_D02G2146	cyan	0.98	61.411	AT5G64210	alternative oxidase 2	4.92	5.75	4.73	1.62	46.52	11.5	66.66	4.34	17.74	2
qLP-Chr14-2	-	GH_D02G2102	darkgreen	0.895	26.061	AT1G76490	hydroxy methylglutaryl CoA reductase 1	9.76	8.45	10.97	19.6	19.99	48.77	28.18	17.12	9.44	6.45
qLP-Chr14-2	-	GH_D02G2055	darkred	0.813	15.218	AT3G19910	RING/U-box superfamily protein	23.19	20.28	21.27	12.48	23.85	18.03	30.77	21.16	28.84	21.35
qLP-Chr14-2	-	GH_D02G2253	darkred	0.839	19.697	AT2G14880	SWIB/MDM2 domain superfamily protein	22.25	22.53	9.1	8.8	11.01	8.76	33.03	9.67	39.9	15.52
qLP-Chr14-2	-	GH_D02G2164	darkred	0.936	33.578	AT2G02220	phytosulfokin receptor 1	1.45	0.02	0.36	0.03	0.25	0.03	3.72	0.47	5.95	0.07
qLP-Chr14-2	-	GH_D02G2094	grey60	0.819	25.341	AT4G35450	ankyrin repeat-containing protein 2	29.36	37.39	45.82	75.29	39.83	87.12	36.63	51.35	39.23	65.85
qLP-Chr14-2	-	GH_D02G2255	lightcyan	0.895	52.218	AT3G19540	Protein of unknown function (DUF620)	0.18	0.21	0.16	0.23	0.4	0.4	12.11	13.54	55.98	23.02
qLP-Chr14-2	-	GH_D02G2124	lightcyan	0.96	68.456	AT5G64570	beta-D-xylosidase 4	114.69	205.8	24.59	32.89	55.08	41.75	313.19	229.82	1191.03	428.09
qLP-Chr14-2	-	GH_D02G2232	lightyellow	0.865	31.698	AT4G33820	Glycosyl hydrolase superfamily protein	12.3	18.18	60.22	18.75	0.62	0.48	0.73	0.71	0.61	0.15
qLP-Chr14-2	-	GH_D02G2262	lightyellow	0.88	36.735	AT2G14960	Auxin-responsive GH3 family protein	9.87	9.52	31.34	26.43	9.03	11.47	0.93	0.57	1.72	0.61
qLP-Chr14-2	-	GH_D02G2061	lightyellow	0.94	51.999	AT5G23280	TCP family transcription factor	6.13	5.94	14.41	13.75	4.16	6.01	1.58	1.06	1.45	0.65
qLP-Chr14-2	-	GH_D02G2243	magenta	0.911	92.227	AT2G14820	Phototropic-responsive NPH3 family protein	0.85	3.31	0.31	1.5	0.85	3	5.69	4.71	11.34	18.48
qLP-Chr14-2	-	GH_D02G2177	magenta	0.971	124.796	AT5G09530	hydroxyproline-rich glycoprotein family protein	17.74	0.31	5.81	33.76	61.33	56.92	2857.32	6425.72	9228.99	21205.8
qLP-Chr14-2	-	GH_D02G2178	magenta	0.984	129.117	-	-	3.64	0	0.69	4.68	7.76	6.43	167.13	266.46	1342.62	4199.53
qLP-Chr14-2	-	GH_D02G2223	midnightblue	0.887	42.937	AT4G33800	unknown protein; Has 30201 Blast hits to 17322 proteins in 780 species: Archae - 12; Bacteria - 1396; Metazoa - 17338; Fungi - 3422; Plants - 5037; Viruses - 0; Other Eukaryotes - 2996 (source: NCBI BLink).	1.04	0.47	2.92	4.88	280.05	250.12	32.6	21.42	2.07	1.49
qLP-Chr14-2	-	GH_D02G2199	orange	0.927	164.246	AT5G61930	Arabidopsis thaliana protein of unknown function (DUF794)	0.11	3.85	0.24	1.11	0.04	0.89	0.02	0.7	0.2	0.42
qLP-Chr14-2	-	GH_D02G2271	orange	0.95	216.814	AT3G19450	GroES-like zinc-binding alcohol dehydrogenase family protein	1.18	3.62	0.03	0.54	0	0.07	0.04	0.24	0.1	0.35
qLP-Chr17-2	-	GH_D03G1304	black	-0.864	64.566	AT5G50400	purple acid phosphatase 27	3.09	10.84	0.79	21.86	0.48	20.21	0.46	10.78	0.8	9.81
qLP-Chr17-2	-	GH_D03G1312	black	-0.89	66.831	AT4G29090	Ribonuclease H-like superfamily protein	0.07	10.4	0.01	5.16	0.06	8.57	0.17	6.91	0.11	7.62
qLP-Chr17-2	-	GH_D03G0857	black	-0.894	69.699	AT3G56750	unknown protein; BEST Arabidopsis thaliana protein match is: unknown protein (TAIR:AT2G41150.2); Has 128 Blast hits to 128 proteins in 16 species: Archae - 0; Bacteria - 0; Metazoa - 0; Fungi - 0; Plants - 117; Viruses - 0; Other Eukaryotes - 11 (source: NCBI BLink).	5.27	5.09	3.57	12.63	2.26	12.04	1.72	13.13	1.9	11.9
qLP-Chr17-2	-	GH_D03G1107	blue	0.948	358.126	AT5G08020	RPA70-kDa subunit B	65.7	28.85	5.74	4.9	0.24	0.24	0.16	0.17	0.11	0.08
qLP-Chr17-2	-	GH_D03G1176	blue	0.965	361.964	AT4G13940	S-adenosyl-L-homocysteine hydrolase	8.87	4.51	2.24	1.11	1.28	0.14	0.97	0.3	0.61	0.28
qLP-Chr17-2	-	GH_D03G1260	blue	0.969	365.959	AT3G26744	basic helix-loop-helix (bHLH) DNA-binding superfamily protein	25.72	12.67	7.14	1.67	2.6	0.24	1.07	0.32	1.5	0.43
qLP-Chr17-2	-	GH_D03G1282	cyan	0.88	38.917	AT5G50710	unknown protein; BEST Arabidopsis thaliana protein match is: unknown protein (TAIR:AT5G50610.1); Has 30201 Blast hits to 17322 proteins in 780 species: Archae - 12; Bacteria - 1396; Metazoa - 17338; Fungi - 3422; Plants - 5037; Viruses - 0; Other Eukaryotes - 2996 (source: NCBI BLink).	1.04	2.1	0.33	0.54	3.26	0.44	9.91	1.95	3.35	1.57
qLP-Chr17-2	-	GH_D03G1172	cyan	0.894	40.371	AT2G31880	Leucine-rich repeat protein kinase family protein	1.27	0.51	2.08	0.35	3.57	0.3	4.23	0.45	2.52	0.11
qLP-Chr17-2	-	GH_D03G0881	cyan	0.904	40.628	AT4G11280	1-aminocyclopropane-1-carboxylic acid (acc) synthase 6	0.73	0.58	1.38	0.95	5.26	0.93	6.99	0.61	3.56	0.23
qLP-Chr17-2	-	GH_D03G1096	darkgreen	0.805	16.51	AT1G26610	C2H2-like zinc finger protein	0.11	0.51	1.9	6.27	5.3	8.66	2.14	6.86	0.22	2.73
qLP-Chr17-2	-	GH_D03G0929	darkred	0.808	17.623	AT5G41800	Transmembrane amino acid transporter family protein	0.8	0.66	3.43	0.49	3.33	0.29	4	0.13	6.92	0.38
qLP-Chr17-2	-	GH_D03G1167	darkred	0.869	24.531	AT3G26310	cytochrome P450, family 71, subfamily B, polypeptide 35	1.74	1.95	2.05	2.01	2.94	2.63	3.74	2.25	5.62	2.85
qLP-Chr17-2	-	GH_D03G1085	darkred	0.859	27.179	AT2G03350	Protein of unknown function, DUF538	3.33	1.2	15.28	9.06	24.76	11.78	62.41	29.51	55.77	42.21
qLP-Chr17-2	-	GH_D03G1220	darkturquoise	0.849	22.296	AT3G19930	sugar transporter 4	12.64	16.87	11.38	21	27.55	48.74	27.31	64.72	16.21	19.26
qLP-Chr17-2	-	GH_D03G1457	darkturquoise	0.854	22.793	AT2G28790	Pathogenesis-related thaumatin superfamily protein	0.48	2.49	0.73	1.34	0.21	12.3	0.39	21.17	1.86	5.34
qLP-Chr17-2	-	GH_D03G1518	grey60	0.907	42.615	AT5G21060	Glyceraldehyde-3-phosphate dehydrogenase-like family protein	11.05	9.65	11.74	19.01	8.3	25.68	9.76	11.54	6.52	9.79
qLP-Chr17-2	-	GH_D03G1165	grey60	0.928	48.366	AT3G48310	cytochrome P450, family 71, subfamily A, polypeptide 22	10.46	14.29	16.81	26.14	15.21	25.42	12.87	19.32	8.88	11.62
qLP-Chr17-2	-	GH_D03G1316	grey60	0.925	50.417	AT5G24318	O-Glycosyl hydrolases family 17 protein	0.13	0.16	0.79	3.46	0.95	3.75	0	0.22	0.02	0.04
qLP-Chr17-2	-	GH_D03G1434	lightcyan	0.836	35.683	AT1G07620	GTP-binding protein Obg/CgtA	0.06	0	0.26	0.2	0.19	0.31	2.82	0.94	30.25	17.45
qLP-Chr17-2	-	GH_D03G1178	lightcyan	0.873	47.723	AT1G06990	GDSL-like Lipase/Acylhydrolase superfamily protein	0.33	0.02	0.4	0.99	6.3	2.01	175.55	153.42	405.38	196.18
qLP-Chr17-2	-	GH_D03G1285	lightcyan	0.939	58.137	-	-	0.54	0	0.12	0	0.1	0	1.59	0	7.23	0
qLP-Chr17-2	-	GH_D03G1035	lightyellow	0.904	38.831	AT1G74780	Nodulin-like / Major Facilitator Superfamily protein	3.92	0.65	9.64	7.79	2.7	3.6	2.34	1.91	1.26	0.21
qLP-Chr17-2	-	GH_D03G1039	lightyellow	0.903	41.168	AT3G47890	Ubiquitin carboxyl-terminal hydrolase-related protein	5.05	6.89	9.81	9.66	6.04	6.07	5.03	5.31	4.28	2.42
qLP-Chr17-2	-	GH_D03G0934	lightyellow	0.961	56.211	AT1G64390	glycosyl hydrolase 9C2	8.93	12.23	42.02	30.07	6.73	5.48	0.58	0.79	0.21	0.13
qLP-Chr17-2	-	GH_D03G1373	magenta	0.941	106.768	AT2G26975	Ctr copper transporter family	18.43	21.11	21.82	24.21	54.14	57.45	62.29	106.61	88.47	236.49
qLP-Chr17-2	-	GH_D03G0950	magenta	0.962	112.81	AT1G64405	unknown protein; Has 13 Blast hits to 13 proteins in 7 species: Archae - 0; Bacteria - 0; Metazoa - 0; Fungi - 0; Plants - 13; Viruses - 0; Other Eukaryotes - 0 (source: NCBI BLink).	0.17	0.1	0.23	0	0	0	0.64	2.44	3.28	10.27
qLP-Chr17-2	-	GH_D03G1399	magenta	0.983	126.317	AT3G55530	RING/U-box superfamily protein	6.74	10.65	4.83	5.41	2.57	7.15	2.61	9.99	22.66	73.69
qLP-Chr17-2	-	GH_D03G0984	midnightblue	0.807	33.911	AT4G00910	Aluminium activated malate transporter family protein	0	0	2.65	1.18	6.89	1.53	0.16	0.05	0.06	0.02
qLP-Chr17-2	-	GH_D03G1018	midnightblue	0.93	53.77	AT1G76890	Duplicated homeodomain-like superfamily protein	1.26	1.02	14.64	4.41	33.4	24.44	7.38	1.22	2.94	0.5
qLP-Chr17-2	-	GH_D03G0983	orange	0.957	243.218	AT2G27230	transcription factor-related	2.43	5.45	0.67	1.23	0.16	0.2	0.3	0.03	0.02	0.04
qLP-Chr17-2	-	GH_D03G1281	orange	0.984	247.41	AT5G50580	SUMO-activating enzyme 1B	4.47	13.73	0.86	4.59	0.28	1.72	0.66	2.23	0.7	1.89
qLP-Chr17-2	-	GH_D03G1006	orange	0.972	258.476	AT2G46870	AP2/B3-like transcriptional factor family protein	1.59	4.43	0.22	0.56	0.03	0.09	0.02	0.06	0.21	0.07
qLP-Chr19-1	-	GH_D05G1753	black	0.867	63.097	AT1G11860	Glycine cleavage T-protein family	4.42	3.83	8.51	2.22	11.73	3.83	13.24	3.83	11.26	0.32
qLP-Chr19-1	-	GH_D05G1873	black	-0.891	69.586	AT1G76010	Alba DNA/RNA-binding protein	1.76	7.85	0.58	5.88	0.49	5.6	0.52	4.05	0.77	6.7
qLP-Chr19-1	-	GH_D05G1564	black	0.955	98.072	AT2G34250	SecY protein transport family protein	23.11	7.84	37.88	4.85	38.33	5.21	45.64	10.89	27.44	9.03
qLP-Chr19-1	-	GH_D05G1978	blue	0.979	336.792	AT3G18030	HAL3-like protein A	25.53	5.3	4.69	0.94	1.89	0.46	1.75	0.38	1.98	0.38
qLP-Chr19-1	-	GH_D05G1571	blue	0.929	338.73	AT1G29270	unknown protein; BEST Arabidopsis thaliana protein match is: unknown protein (TAIR:AT2G40435.1); Has 98 Blast hits to 98 proteins in 15 species: Archae - 0; Bacteria - 0; Metazoa - 0; Fungi - 0; Plants - 98; Viruses - 0; Other Eukaryotes - 0 (source: NCBI BLink).	4.77	2.52	0.53	0.48	0	0.04	0.05	0	0	0
qLP-Chr19-1	-	GH_D05G1859	blue	0.963	359.674	AT4G38470	ACT-like protein tyrosine kinase family protein	3.45	1.5	0.49	0.4	0.18	0.05	0.21	0.06	0.41	0
qLP-Chr19-1	-	GH_D05G1979	cyan	0.833	30.69	AT1G75180	Erythronate-4-phosphate dehydrogenase family protein	16.84	14.8	15.39	11.79	27.41	16.41	29.74	10.5	27.24	14.09
qLP-Chr19-1	-	GH_D05G1642	cyan	0.833	33.477	AT2G28510	Dof-type zinc finger DNA-binding family protein	0.41	0.57	0.78	0.24	12.17	0.17	7.38	0.38	2.76	1.36
qLP-Chr19-1	-	GH_D05G1838	cyan	0.928	44.95	AT1G76250	unknown protein; INVOLVED IN: biological_process unknown; LOCATED IN: endomembrane system; EXPRESSED IN: 6 plant structures; EXPRESSED DURING: 4 anthesis, petal differentiation and expansion stage; Has 74 Blast hits to 74 proteins in 16 species: Archae - 0; Bacteria - 0; Metazoa - 1; Fungi - 0; Plants - 69; Viruses - 0; Other Eukaryotes - 4 (source: NCBI BLink).	3.74	1.9	7.04	3.57	8.51	3.44	16.57	4	6.09	2.65
qLP-Chr19-1	-	GH_D05G1951	darkgreen	0.82	18.28	AT2G21520	Sec14p-like phosphatidylinositol transfer family protein	4.33	5.42	26.81	27.77	29.26	47.45	25.87	19.55	15.62	10.01
qLP-Chr19-1	-	GH_D05G1777	darkgreen	0.91	28.708	AT4G04020	fibrillin	10.45	10.83	24.95	23.76	26.74	53.6	21.45	22.99	6.23	4.81
qLP-Chr19-1	-	GH_D05G1852	darkgreen	0.915	31.133	AT1G76160	SKU5 similar 5	1.76	1.72	10.77	50.94	58.99	99.63	21.95	20.48	3.84	1.91
qLP-Chr19-1	-	GH_D05G1537	darkred	0.86	24.808	AT2G34410	O-acetyltransferase family protein	13.7	13.61	20.82	17.54	29.39	13.59	145.83	132.45	236.9	74.83
qLP-Chr19-1	-	GH_D05G1354	darkred	0.861	25.386	AT1G17730	vacuolar protein sorting 46.1	38.31	31.75	39.92	28.65	56.64	38.7	85.13	49.22	78.18	67.28
qLP-Chr19-1	-	GH_D05G1875	darkred	0.909	29.82	AT5G42180	Peroxidase superfamily protein	0	0.08	0.06	0.02	0.15	0.21	9.77	0.96	9.22	1.55
qLP-Chr19-1	-	GH_D05G2052	darkturquoise	0.929	35.596	AT1G47480	alpha/beta-Hydrolases superfamily protein	0.14	0.59	0.2	0.11	0.12	0.26	0.84	22.35	0.67	2.05
qLP-Chr19-1	-	GH_D05G1340	darkturquoise	0.967	42.684	AT2G30395	ovate family protein 17	0	0.14	0	0	0.42	0.41	16.83	93.75	1.81	0.56
qLP-Chr19-1	-	GH_D05G1880	darkturquoise	0.967	42.862	AT1G75900	GDSL-like Lipase/Acylhydrolase superfamily protein	0.31	0.22	0.78	1.67	4.09	82.54	6.21	977.09	2.47	213.05
qLP-Chr19-1	-	GH_D05G1560	lightyellow	0.869	32.665	AT1G29670	GDSL-like Lipase/Acylhydrolase superfamily protein	26.12	10.45	74.41	67.79	18.07	19.94	10.41	2.9	7.68	0.8
qLP-Chr19-1	-	GH_D05G1512	lightyellow	0.869	38.108	AT2G34590	Transketolase family protein	25.79	26.81	35.04	27.28	17.88	15.04	9.94	4.87	2.8	1.65
qLP-Chr19-1	-	GH_D05G1280	magenta	0.969	120.063	AT1G80360	Pyridoxal phosphate (PLP)-dependent transferases superfamily protein	14.06	13.57	10.01	8	8.5	16.44	28.47	39.4	33.08	105.19
qLP-Chr19-1	-	GH_D05G2004	magenta	0.977	124.9	AT1G75050	Pathogenesis-related thaumatin superfamily protein	7.57	2.43	0.4	4.24	5.06	4.38	11.66	34.75	850.5	3174.26
qLP-Chr19-1	-	GH_D05G1796	magenta	0.984	126.874	AT4G17220	microtubule-associated proteins 70-5	0.3	0.11	0.05	0.14	0.13	0.29	0.61	1.96	3.53	21.55
qLP-Chr19-1	-	GH_D05G1638	midnightblue	0.917	51.74	AT5G49800	Polyketide cyclase/dehydrase and lipid transport superfamily protein	2.47	1.45	11.15	3.11	27.39	14.51	5.55	0.75	0.8	0.37
qLP-Chr19-1	-	GH_D05G1493	midnightblue	0.925	53.419	AT1G30360	Early-responsive to dehydration stress protein (ERD4)	30.95	29.47	134.52	125.09	241.43	204.62	124.59	81.5	46.47	32.63
qLP-Chr19-1	-	GH_D05G1298	midnightblue	0.943	58.844	AT1G79910	Regulator of Vps4 activity in the MVB pathway protein	1.93	1	25.11	6.98	111.89	45.82	25.63	3.41	7.75	3.42
qLP-Chr19-1	-	GH_D05G1534	orange	0.963	227.599	AT1G29950	basic helix-loop-helix (bHLH) DNA-binding superfamily protein	30.22	81	24.63	26.23	14.89	21.22	14.63	19.25	10.28	5.22
qLP-Chr19-1	-	GH_D05G1732	orange	0.97	233.652	AT4G21870	HSP20-like chaperones superfamily protein	0.49	4.43	0.05	0.78	0.11	0	0	0	0.06	0
qLP-Chr19-1	-	GH_D05G1966	orange	0.976	247.314	AT1G47270	tubby like protein 6	1.33	10.41	0.17	1.07	0	0	0.02	0	0	0.04
qLP-Chr19-1	-	GH_D05G1736	royalblue	0.895	34.516	AT1G11655	unknown protein; BEST Arabidopsis thaliana protein match is: unknown protein (TAIR:AT4G21902.1); Has 22 Blast hits to 22 proteins in 6 species: Archae - 0; Bacteria - 0; Metazoa - 0; Fungi - 0; Plants - 22; Viruses - 0; Other Eukaryotes - 0 (source: NCBI BLink).	0.3	0	5.94	0.57	4.22	0.15	0.29	0.07	0.08	0.16
qLP-Chr19-1	-	GH_D05G1346	royalblue	0.933	40.676	AT3G16370	GDSL-like Lipase/Acylhydrolase superfamily protein	68.82	9.44	1642.06	40.59	1632.52	30.58	481.07	14.53	130.23	5.05
qLP-Chr19-1	-	GH_D05G1798	royalblue	0.949	43.04	AT4G16380	Heavy metal transport/detoxification superfamily protein	0.19	0.1	100.48	9.21	106.03	33.3	36.65	9.64	9.08	4.34
qLP-Chr24-2	-	GH_D08G0797	black	0.898	74.986	AT2G43350	glutathione peroxidase 3	3.15	0.42	12.57	0.24	18.54	0.47	17.94	0.42	14.41	0.59
qLP-Chr24-2	-	GH_D08G0777	blue	0.943	320.448	AT4G03150	unknown protein; FUNCTIONS IN: molecular_function unknown; INVOLVED IN: biological_process unknown; LOCATED IN: chloroplast; EXPRESSED IN: 20 plant structures; EXPRESSED DURING: 13 growth stages; Has 30201 Blast hits to 17322 proteins in 780 species: Archae - 12; Bacteria - 1396; Metazoa - 17338; Fungi - 3422; Plants - 5037; Viruses - 0; Other Eukaryotes - 2996 (source: NCBI BLink).	8.96	4.31	2.64	2.52	2.01	1.43	1.07	0.83	1.6	1.11
qLP-Chr24-2	-	GH_D08G0595	blue	0.933	334.923	AT3G63540	Mog1/PsbP/DUF1795-like photosystem II reaction center PsbP family protein	15.91	9.77	5.02	2.91	1.63	2.12	0.97	0.65	2.23	2.02
qLP-Chr24-2	-	GH_D08G0771	blue	0.935	346.616	AT1G54690	gamma histone variant H2AX	91.67	44.73	5.35	5.9	0.28	0.28	0.29	0.16	0.56	0.18
qLP-Chr24-2	-	GH_D08G0680	cyan	0.827	28.292	AT2G30580	DREB2A-interacting protein 2	0.49	0.48	0.42	0.2	2.36	0.63	2.99	0.23	0.29	0.22
qLP-Chr24-2	-	GH_D08G0722	cyan	0.924	45.461	AT1G03140	splicing factor Prp18 family protein	3.94	4.66	5.74	3.22	10.22	3.45	12.89	3.99	7.86	1.07
qLP-Chr24-2	-	GH_D08G0756	darkgreen	0.814	14.441	AT2G48150	glutathione peroxidase 4	5.02	14.22	5.21	20.6	14.17	36.77	24.63	15.01	6.1	6.97
qLP-Chr24-2	-	GH_D08G0793	darkgreen	0.868	27.926	AT1G03010	Phototropic-responsive NPH3 family protein	0.13	0.07	5.31	2.19	15.49	23.62	2.34	1.14	0.94	0.03
qLP-Chr24-2	-	GH_D08G0510	darkgreen	0.923	35.227	AT4G02900	ERD (early-responsive to dehydration stress) family protein	0.2	0.39	0.69	0.64	9.09	17.74	1.5	1.4	0.31	0.06
qLP-Chr24-2	-	GH_D08G0778	darkred	0.82	20.174	AT5G62000	auxin response factor 2	1.03	0.85	0.31	0.36	0.26	1	15.34	5.3	7.86	0.92
qLP-Chr24-2	-	GH_D08G0677	darkturquoise	0.829	17.706	AT1G06730	pfkB-like carbohydrate kinase family protein	1.98	2.32	1.5	1.57	3.54	3.52	3.1	6.69	2.76	2.26
qLP-Chr24-2	-	GH_D08G0684	darkturquoise	0.83	18.913	AT5G43700	AUX/IAA transcriptional regulator family protein	1.6	1.9	6.83	8.86	5.13	8.6	11.92	26.79	0.87	0.27
qLP-Chr24-2	-	GH_D08G0533	grey60	0.809	24.781	AT3G07020	UDP-Glycosyltransferase superfamily protein	7.74	10.07	8.32	10.51	5.8	14.93	5.5	10.09	4.6	6.16
qLP-Chr24-2	-	GH_D08G0672	grey60	0.906	44.216	AT2G42430	lateral organ boundaries-domain 16	0.06	0.17	0.25	4.92	0.22	7.05	0.2	1.31	0.08	0.09
qLP-Chr24-2	-	GH_D08G0708	lightcyan	0.876	39.066	AT3G22750	Protein kinase superfamily protein	1.71	1.26	0.79	0.49	0.14	0.12	0.38	0.35	4.42	0.84
qLP-Chr24-2	-	GH_D08G0593	lightcyan	0.856	39.486	AT2G44500	O-fucosyltransferase family protein	0.12	0.25	0.15	0.17	1.27	1.77	2.35	1.91	7.86	0.33
qLP-Chr24-2	-	GH_D08G0577	lightcyan	0.897	52.437	AT5G15630	COBRA-like extracellular glycosyl-phosphatidyl inositol-anchored protein family	0.12	0.07	0.14	0.23	0.26	0.53	31.69	21.76	85.72	42.56
qLP-Chr24-2	-	GH_D08G0786	magenta	0.885	75.11	AT5G23660	homolog of Medicago truncatula MTN3	0.29	0.41	2.42	2.37	0.22	1.67	4.81	5.38	14.59	33.89
qLP-Chr24-2	-	GH_D08G0560	magenta	0.942	108.309	AT2G04780	FASCICLIN-like arabinoogalactan 7	9.62	0.07	3.93	15.53	27.58	24.64	463.85	852.4	6181.8	10298.2
qLP-Chr24-2	-	GH_D08G0701	orange	0.95	238.226	AT4G14713	TIFY domain/Divergent CCT motif family protein	5	9.72	1.15	2.02	0.08	0.91	0.29	0.04	0.14	0.24
qLP-Chr24-2	-	GH_D08G0698	orange	0.968	248.839	AT4G02670	indeterminate(id)-domain 12	10.29	35.35	1.02	2.27	0.15	0.16	0.16	0.04	0.41	0.27
qLP-Chr24-2	-	GH_D08G0540	orange	0.982	261.707	AT3G25110	fatA acyl-ACP thioesterase	29.39	79.26	13.36	25.89	4.41	12.26	1.96	2.18	2.21	2.5
qLP-Chr24-2	-	GH_D08G0638	royalblue	0.83	22.576	AT3G60280	uclacyanin 3	3.9	1.57	117.35	51.72	79.23	17.38	28.84	10.15	30.04	13.45
qLP-Chr24-2	-	GH_D08G0557	royalblue	0.876	29.54	AT3G07810	RNA-binding (RRM/RBD/RNP motifs) family protein	7.14	9.09	26.46	9.12	20.15	8.82	14.44	10.04	10.56	7.14
a+,Positive additive effects indicated that Pima S-7 alleles increased the phenotypic value; -, Negative additive effects indicated that CCRI35 alleles increased the phenotypic value
bMM, module correlation degree
CK.in, Intramodular connectivity
